# Supplementary material for: Rh-catalyzed chemodivergent [4+1]-annulation/allylation of sulfoxonium ylides with α-methylene-β-lactones: access to α-indanonyl/α-benzyl acrylates
Source: Royal Society of Chemistry journal article supplement (doi:10.1039/d5cc05716g), 2025-12-02

Supporting Information

**Rh-catalyzed chemodivergent [4+1]-annulation/allylation of sulfoxonium ylides with  $\alpha$ -methylene- $\beta$ -lactones: access to  $\alpha$ -indanonyl/ $\alpha$ -benzyl acrylates**

**Table of Contents**

|    |                                                                                                                                                    |        |
|----|----------------------------------------------------------------------------------------------------------------------------------------------------|--------|
| 1  | General Information                                                                                                                                | S2     |
| 2  | Crystal Structure and Data of <b>5ae</b> and <b>5ia</b>                                                                                            | S2-5   |
| 3  | Biologically Important Indanonyl motifs                                                                                                            | S5     |
| 4  | Optimization Studies                                                                                                                               | S5-6   |
| 5  | General Procedure for the Preparation of Sulfoxonium Ylides                                                                                        | S7     |
| 6  | General Procedure for the Preparation of $\alpha$ -Methylene- $\beta$ -lactones                                                                    | S7-8   |
| 7  | General Procedure for the Preparation of Methylene- $\beta$ -lactam                                                                                | S8     |
| 8  | General Procedure for the Rh-Catalyzed C-H Annulation of Sulfoxonium Ylides with $\alpha$ -Methylene- $\beta$ -lactones and Scale-up of <b>3aa</b> | S9     |
| 9  | General Procedure for the Rh-Catalyzed C-H Allylation of Sulfoxonium Ylides with $\alpha$ -Methylene- $\beta$ -lactones and Scale-up of <b>4aa</b> | S10    |
| 10 | Post-Synthetic Modifications                                                                                                                       | S11-13 |
| 11 | Characterization Data                                                                                                                              | S13-29 |
| 12 | Mechanistic Investigation                                                                                                                          | S29-39 |
| 13 | References                                                                                                                                         | S39    |
| 14 | NMR ( $^1\text{H}$ , $^{13}\text{C}$ and $^{19}\text{F}$ ) Spectra                                                                                 | S40-82 |

**General Information.** [Cp\*RhCl<sub>2</sub>]<sub>2</sub> (97%), AgSbF<sub>6</sub> (98%), Cu(OAc)<sub>2</sub> (98%), Zn(OAc)<sub>2</sub> (>98%), AgOAc (≥99.99%), CsOAc (98%), NaOAc (>98%), PivOH (>98%), MesCO<sub>2</sub>H (>98%), 1-AdCO<sub>2</sub>H (>98%), 1,1,1,3,3,3-hexafluoroisopropanol (HFIP) (>99%), trifluoroethanol (TFE) (>99%) and carboxylic acids of Sigma-Aldrich, BLD Pharm and TCI chemicals used as received, while [Cp\*Rh(CH<sub>3</sub>CN)<sub>3</sub>](SbF<sub>6</sub>)<sub>2</sub> was prepared according reported procedure.<sup>1</sup> Acetonitrile (CH<sub>3</sub>CN), toluene, methanol (MeOH), tetrahydrofuran (THF), 1,2-dichloroethane (CH<sub>2</sub>Cl)<sub>2</sub> and dichloromethane (CH<sub>2</sub>Cl<sub>2</sub>) were dried prior to use as per the standard procedure. Silica gel-G/GF254 plates (Merck) used for TLC analysis with a mixture of EtOAc and n-hexane as the eluent. Column chromatography was carried out using Rankem silica gel (60-120 mesh). Bruker Avance III 400, 500 and 600 MHz NMR spectrometers used to record (<sup>1</sup>H, <sup>13</sup>C and <sup>19</sup>F) spectra using CDCl<sub>3</sub> and DMSO-*d*<sub>6</sub> as solvent and tetramethylsilane (TMS) as an internal standard. Chemical shifts (δ) and spin-spin coupling constant (*J*) reported in parts per million and hertz (Hz), respectively, and to describe peak patterns following abbreviations used when appropriate: s = singlet, d = doublet, t = triplet, q = quartet, dd = doublet of doublets and m = multiplet. Melting point of the products was measured on Büchi melting point apparatus, MPB-540. Mestre nova software was used for the spectral analysis. Q-ToF ESI-MS instrument (model HAB273) was used for recording HRMS. Infrared spectra recorded on Perkin Elmer FT-IR instrument. Single crystal X-ray data collected on a Bruker SMART APEX equipped with a CCD area detector using Mo/*K*α radiation and the structures solved by direct method using SHELXL-18 and SHELXL-19 (Göttingen, Germany).

**Sample Preparation for Crystal Growth.** The compounds **5ae** and **5ia** were dissolved in a 1:1 mixture of CH<sub>2</sub>Cl<sub>2</sub> and n-hexane (1 mL) and kept at room temperature for slow evaporation (2 days). Needle and block shaped crystals were formed, which were subjected to X-ray diffraction.

#### Crystal Structure and Data of **5ae**.

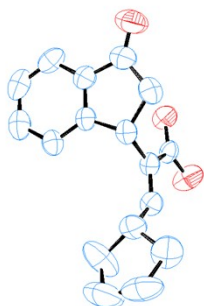

**Figure S1.** ORTEP diagram of **5ae** (CCDC No 2420493) with 50% ellipsoid. H-Atoms are omitted for clarity.

|                                                   |                                                                                                                                                                  |
|---------------------------------------------------|------------------------------------------------------------------------------------------------------------------------------------------------------------------|
| CCDC No.                                          | 2420493                                                                                                                                                          |
| Identification code                               | <b>5ae</b>                                                                                                                                                       |
| Empirical formula                                 | $C_{17}H_{18}O_3$                                                                                                                                                |
| Formula weight                                    | 270.31                                                                                                                                                           |
| Crystal habit, colour                             | Needle, Colourless                                                                                                                                               |
| Temperature, $T/K$                                | 295K                                                                                                                                                             |
| Wavelength, $\lambda/\text{\AA}$                  | 0.71073 $\text{\AA}$                                                                                                                                             |
| Crystal system                                    | Triclinic                                                                                                                                                        |
| Space group                                       | P -1                                                                                                                                                             |
| Unit cell dimensions                              | $a = 8.4589(6) \text{\AA}$<br>$b = 9.2758(6) \text{\AA}$<br>$c = 9.7016(6) \text{\AA}$<br>$\alpha = 93.006(2)$<br>$\beta = 108.3900(10)$<br>$\gamma = 93.186(2)$ |
| Volume, $V/\text{\AA}^3$                          | 719.26(8) $\text{\AA}^3$                                                                                                                                         |
| $Z$                                               | 2                                                                                                                                                                |
| Calculated density, $\text{Mg}\cdot\text{m}^{-3}$ | 1.248                                                                                                                                                            |
| Absorption coefficient, $\mu/\text{mm}^{-1}$      | 0.085                                                                                                                                                            |
| $F(000)$                                          | 288                                                                                                                                                              |
| $\theta$ range for data collection                | 2.205 to 25.340                                                                                                                                                  |
| Limiting indices                                  | $-10 \leq h \leq 10, -11 \leq k \leq 11, -11 \leq l \leq 11$                                                                                                     |
| Reflection collected / unique                     | 2611/2136                                                                                                                                                        |
| Completeness to $\theta$                          | 99.2 %                                                                                                                                                           |
| Absorption correction                             | Multi-scan                                                                                                                                                       |
| Refinement method                                 | 'SHELXL 2019/1 (Sheldrick, 2015)'                                                                                                                                |
| Data / restraints / parameters                    | 2611/ 0 / 182                                                                                                                                                    |
| Goodness-of-fit on $F^2$                          | 0.1479                                                                                                                                                           |
| Final $R$ indices [ $I > 2\sigma(I)$ ]            | $R1 = 0.0612, wR2 = 0.1479$                                                                                                                                      |
| $R$ indices (all data)                            | $R1 = 0.0754, wR2 = 0.1587$                                                                                                                                      |

## Crystal Structure and Data of **5ia**.

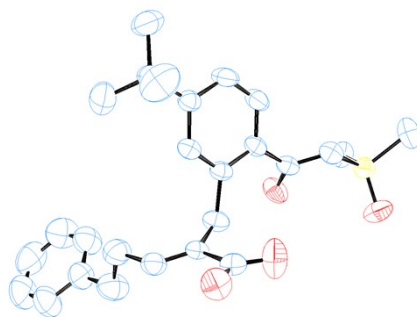

**Figure S2.** ORTEP diagram of **5ia** (CCDC No 2420491) with 50% ellipsoid. H-Atoms are omitted for clarity.

|                                              |                                                                                                                           |
|----------------------------------------------|---------------------------------------------------------------------------------------------------------------------------|
| CCDC No.                                     | 2420491                                                                                                                   |
| Identification code                          | <b>5ia</b>                                                                                                                |
| Empirical formula                            | C <sub>26</sub> H <sub>32</sub> O <sub>4</sub> S                                                                          |
| Formula weight                               | 440.57                                                                                                                    |
| Crystal habit, colour                        | Block, Light yellow                                                                                                       |
| Temperature, <i>T</i> /K                     | 295K                                                                                                                      |
| Wavelength, $\lambda$ /Å                     | 0.71073 Å                                                                                                                 |
| Crystal system                               | Monoclinic                                                                                                                |
| Space group                                  | P 21/c                                                                                                                    |
| Unit cell dimensions                         | $a = 21.4284(15)$ Å<br>$b = 10.2324(7)$ Å<br>$c = 11.5649(8)$ Å<br>$\alpha = 90$<br>$\beta = 105.207(2)$<br>$\gamma = 90$ |
| Volume, $V/\text{Å}^3$                       | 2447.0(3) Å <sup>3</sup>                                                                                                  |
| <i>Z</i>                                     | 4                                                                                                                         |
| Calculated density, Mg·m <sup>-3</sup>       | 1.196                                                                                                                     |
| Absorption coefficient, $\mu/\text{mm}^{-1}$ | 0.160                                                                                                                     |
| <i>F</i> (000)                               | 944                                                                                                                       |
| $\theta$ range for data collection           | 1.970 to 24.999                                                                                                           |
| Limiting indices                             | $-25 \leq h \leq 25$ , $-12 \leq k \leq 12$ , $-13 \leq l \leq 13$                                                        |
| Reflection collected / unique                | 4301/2704                                                                                                                 |
| Completeness to $\theta$                     | 99.9 %                                                                                                                    |



|                                        |                                   |
|----------------------------------------|-----------------------------------|
| Absorption correction                  | Multi-scan                        |
| Refinement method                      | 'SHELXL 2018/3 (Sheldrick, 2015)' |
| Data / restraints / parameters         | 4301/ 0 / 286                     |
| Goodness-of-fit on $F^2$               | 0.1257                            |
| Final $R$ indices [ $I > 2\sigma(I)$ ] | $R1 = 0.0774$ , $wR2 = 0.1257$    |
| $R$ indices (all data)                 | $R1 = 0.1380$ , $wR2 = 0.1575$    |

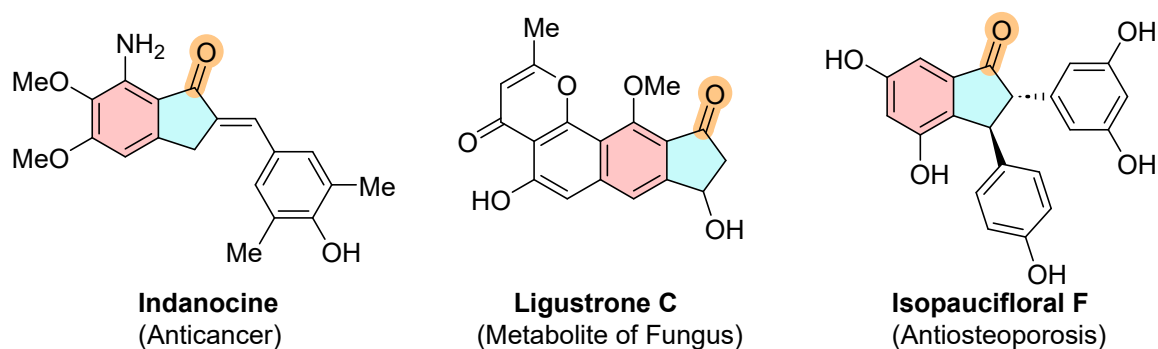

**Figure S3. Examples of Biologically Important Indanonyl Motifs**

**Table S1. Optimization of the Reaction Conditions<sup>a</sup>**

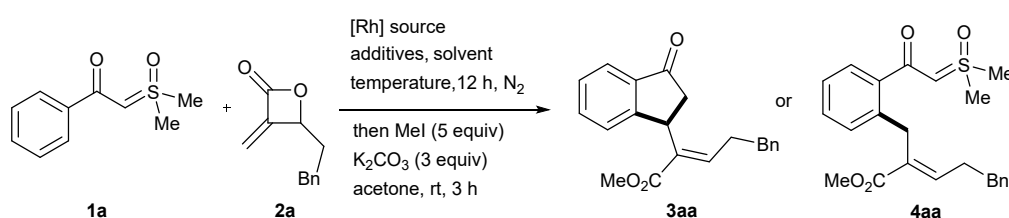

| entry | [Rh] source                   | additive I  | additive II | solvent      | yield (%) <sup>b</sup> |      |
|-------|-------------------------------|-------------|-------------|--------------|------------------------|------|
|       |                               |             |             |              | 3aa                    | 4aa  |
| 1     | $[Cp^*RhCl_2]_2$              | $Cu(OAc)_2$ | $AgSbF_6$   | $(CH_2Cl)_2$ | 17                     | n.d. |
| 2     | $[Cp^*RhCl_2]_2$              | $Zn(OAc)_2$ | $AgSbF_6$   | $(CH_2Cl)_2$ | 25                     | n.d. |
| 3     | $[Cp^*RhCl_2]_2$              | $AgOAc$     | $AgSbF_6$   | $(CH_2Cl)_2$ | 20                     | n.d. |
| 4     | $[Cp^*RhCl_2]_2$              | $CsOAc$     | $AgSbF_6$   | $(CH_2Cl)_2$ | trace                  | n.d. |
| 5     | $[Cp^*RhCl_2]_2$              | $NaOAc$     | $AgSbF_6$   | $(CH_2Cl)_2$ | trace                  | n.d. |
| 6     | $[Cp^*RhCl_2]_2$              | $Zn(OAc)_2$ | $AgNTf_2$   | $(CH_2Cl)_2$ | 21                     | n.d. |
| 7     | $[Cp^*RhCl_2]_2$              | $Zn(OAc)_2$ | $AgBF_4$    | $(CH_2Cl)_2$ | trace                  | n.d. |
| 8     | $[Cp^*Rh(CH_3CN)_3](SbF_6)_2$ | $Zn(OAc)_2$ | -           | $(CH_2Cl)_2$ | 45                     | n.d. |

|                       |                                                                           |                            |                       |                                   |             |             |
|-----------------------|---------------------------------------------------------------------------|----------------------------|-----------------------|-----------------------------------|-------------|-------------|
| 9                     | [Cp*Rh(CH <sub>3</sub> CN) <sub>3</sub> ](SbF <sub>6</sub> ) <sub>2</sub> | Zn(OAc) <sub>2</sub>       | -                     | CH <sub>2</sub> Cl <sub>2</sub>   | 23          | n.d.        |
| 10                    | [Cp*Rh(CH <sub>3</sub> CN) <sub>3</sub> ](SbF <sub>6</sub> ) <sub>2</sub> | Zn(OAc) <sub>2</sub>       | -                     | THF                               | trace       | n.d.        |
| 11                    | [Cp*Rh(CH <sub>3</sub> CN) <sub>3</sub> ](SbF <sub>6</sub> ) <sub>2</sub> | Zn(OAc) <sub>2</sub>       | -                     | toluene                           | trace       | n.d.        |
| 12                    | [Cp*Rh(CH <sub>3</sub> CN) <sub>3</sub> ](SbF <sub>6</sub> ) <sub>2</sub> | Zn(OAc) <sub>2</sub>       | -                     | CH <sub>3</sub> CN                | 18          | n.d.        |
| 13                    | [Cp*Rh(CH <sub>3</sub> CN) <sub>3</sub> ](SbF <sub>6</sub> ) <sub>2</sub> | Zn(OAc) <sub>2</sub>       | -                     | MeOH                              | n.d.        | n.d.        |
| 14                    | [Cp*Rh(CH <sub>3</sub> CN) <sub>3</sub> ](SbF <sub>6</sub> ) <sub>2</sub> | Zn(OAc) <sub>2</sub>       | -                     | HFIP                              | 23          | n.d.        |
| <b>15</b>             | <b>[Cp*Rh(CH<sub>3</sub>CN)<sub>3</sub>](SbF<sub>6</sub>)<sub>2</sub></b> | <b>Zn(OAc)<sub>2</sub></b> | <b>-</b>              | <b>TFE</b>                        | <b>75</b>   | <b>n.d.</b> |
| 16 <sup>c</sup>       | [Cp*Rh(CH <sub>3</sub> CN) <sub>3</sub> ](SbF <sub>6</sub> ) <sub>2</sub> | Zn(OAc) <sub>2</sub>       | -                     | TFE                               | 65          | n.d.        |
| 17 <sup>d</sup>       | [Cp*Rh(CH <sub>3</sub> CN) <sub>3</sub> ](SbF <sub>6</sub> ) <sub>2</sub> | Zn(OAc) <sub>2</sub>       | -                     | TFE                               | 25          | n.d.        |
| 18 <sup>e</sup>       | [Cp*Rh(CH <sub>3</sub> CN) <sub>3</sub> ](SbF <sub>6</sub> ) <sub>2</sub> | Zn(OAc) <sub>2</sub>       | -                     | TFE                               | trace       | n.d.        |
| 19                    | Rh <sub>2</sub> (OAc) <sub>4</sub>                                        | Zn(OAc) <sub>2</sub>       | -                     | TFE                               | trace       | n.d.        |
| 20 <sup>f</sup>       | [Cp*Rh(CH <sub>3</sub> CN) <sub>3</sub> ](SbF <sub>6</sub> ) <sub>2</sub> | Zn(OAc) <sub>2</sub>       | PivOH                 | TFE                               | n.d.        | 52          |
| <b>21<sup>f</sup></b> | <b>[Cp*RhCl<sub>2</sub>]<sub>2</sub></b>                                  | <b>Zn(OAc)<sub>2</sub></b> | <b>PivOH</b>          | <b>TFE</b>                        | <b>n.d.</b> | <b>80</b>   |
| 22 <sup>f</sup>       | [Cp*RhCl <sub>2</sub> ] <sub>2</sub>                                      | Zn(OAc) <sub>2</sub>       | MesCO <sub>2</sub> H  | TFE                               | n.d.        | 64          |
| 23 <sup>f</sup>       | [Cp*RhCl <sub>2</sub> ] <sub>2</sub>                                      | Zn(OAc) <sub>2</sub>       | 1-AdCO <sub>2</sub> H | TFE                               | n.d.        | 53          |
| 24 <sup>f,g</sup>     | [Cp*RhCl <sub>2</sub> ] <sub>2</sub>                                      | Zn(OAc) <sub>2</sub>       | PivOH                 | TFE                               | n.d.        | 74          |
| 25                    | [Cp*RhCl <sub>2</sub> ] <sub>2</sub>                                      | Zn(OAc) <sub>2</sub>       | AgSbF <sub>6</sub>    | TFE                               | n.d.        | 10          |
| 26 <sup>f</sup>       | [Cp*RhCl <sub>2</sub> ] <sub>2</sub>                                      | -                          | PivOH                 | TFE                               | n.d.        | 40          |
| 27 <sup>f</sup>       | [Cp*RhCl <sub>2</sub> ] <sub>2</sub>                                      | Zn(OAc) <sub>2</sub>       | PivOH                 | (CH <sub>2</sub> Cl) <sub>2</sub> | n.d.        | trace       |
| 28 <sup>f</sup>       | [Cp*RhCl <sub>2</sub> ] <sub>2</sub>                                      | Zn(OAc) <sub>2</sub>       | PivOH                 | CH <sub>3</sub> CN                | n.d.        | n.d.        |
| 29 <sup>f</sup>       | [Cp*RhCl <sub>2</sub> ] <sub>2</sub>                                      | Zn(OAc) <sub>2</sub>       | PivOH                 | HFIP                              | n.d.        | trace       |
| 30 <sup>f</sup>       | -                                                                         | Zn(OAc) <sub>2</sub>       | PivOH                 | TFE                               | n.d.        | n.d.        |

<sup>a</sup>Reaction conditions: **1a** (0.1 mmol), **2a** (0.15 mmol), [Rh] (2.5 mol %), additive I (1 equiv), additive II (20 mol %), solvent (1 mL), 80 °C, 12 h, N<sub>2</sub> atmosphere, then MeI (5 equiv), K<sub>2</sub>CO<sub>3</sub> (3 equiv), acetone (2 mL), rt, 3 h. <sup>b</sup>Isolated yield. <sup>c</sup>At 100 °C. <sup>d</sup>At room temperature. <sup>e</sup>Under air. <sup>f</sup>Additive II (1 equiv), <sup>g</sup>AgSbF<sub>6</sub> (20 mol %). n.d. = not detected. TFE = 2,2,2-trifluoroethanol. HFIP = 1,1,1,3,3,3-hexafluoroisopropanol.

## General Procedure for the Preparation of Sulfoxonium Ylides 1.<sup>2</sup>

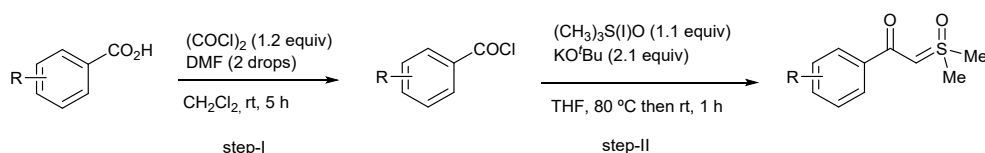

**Step-I:** To a stirred solution of carboxylic acid (5 mmol, 1.0 equiv) in  $\text{CH}_2\text{Cl}_2$  (10 mL), DMF (2 drops) was added followed by the dropwise addition of  $(\text{COCl})_2$  (6 mmol, 0.51 mL, 1.2 equiv). The reaction was allowed to stir at room temperature for 5 h. Evaporation of the solvent gave a residue, which was dissolved in THF (5 mL). The resulting solution was used as acid chloride solution in subsequent reactions.

**Step-II:** To a stirred solution of potassium *tert*-butoxide (10.5 mmol, 1.1 g, 2.1 equiv) in THF (10 mL), trimethylsulfoxonium iodide (5.5 mmol, 1.2 g, 1.1 equiv) was added under  $\text{N}_2$  atmosphere and it was allowed to stir at 80 °C for 30 minutes. The reaction mixture was then cooled to 0 °C and acid chloride solution (obtained by **step-I**) was added dropwise. The reaction mixture was allowed to stir at room temperature for an additional 1 h. After completion (monitored by TLC), the solvent was evaporated and the residue was treated with water (10 mL). The resultant solution was extracted using EtOAc (3 x 10 mL) and washed with water (10 mL). Drying ( $\text{Na}_2\text{SO}_4$ ) and evaporation of the solvent gave a residue that was purified on silica gel column chromatography (EtOAc : MeOH = 20:1) to afford the sulfoxonium ylides **1a-r**.

## General Procedure for the Preparation of $\alpha$ -Methylene- $\beta$ -lactones 2.<sup>3b-d</sup>

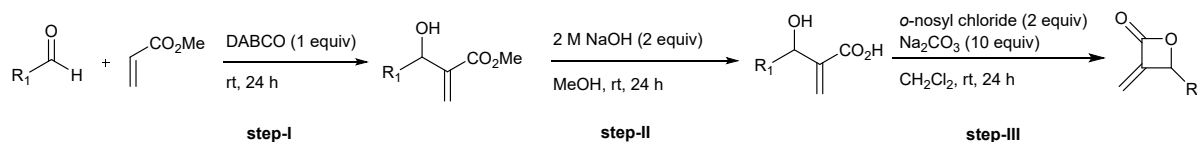

**Step-I.** Aldehyde (20 mmol, 1.0 equiv), methyl acrylate (60 mmol, 5.4 mL, 3.0 equiv) and DABCO (20 mmol, 2.24 mg, 1.0 equiv) were stirred at room temperature for 24 h. After completion (monitored by TLC), the reaction mixture was diluted with EtOAc (10 mL) and washed with saturated  $\text{NaHCO}_3$  (5 mL). The residue was extracted with EtOAc (3 x 10 mL). The combined organic part was washed with water (10 mL) and dried ( $\text{Na}_2\text{SO}_4$ ). Evaporation of the solvent gave MBH adduct, which was used for the next step without further purification.

**Step-II.** To a stirred solution of MBH adduct (obtained by **step-I**) (20 mmol, 1.0 equiv) in MeOH (10 mL), 2 M NaOH (20 mL, 2 equiv) was added dropwise and the resultant mixture was allowed to stir at room temperature for 24 h. After completion (monitored by TLC), the solvent was evaporated and the resulting residue was acidified using 1 N HCl until pH = 1 and extracted using EtOAc (3 x 10 mL). The combined organic part was washed with water (10

mL) and dried (Na<sub>2</sub>SO<sub>4</sub>). Evaporation of the solvent gave a residue that was purified on silica gel column chromatography (EtOAc : n-hexane = 1:1) to afford  $\alpha$ -methylene- $\beta$ -hydroxyacids.

**Step-III.** To a stirred solution of the acid (obtained by **step-II**) (10 mmol, 1.0 equiv) in CH<sub>2</sub>Cl<sub>2</sub> (50 mL), Na<sub>2</sub>CO<sub>3</sub> (100 mmol, 10.6 g, 10 equiv) was added and allowed to stir at room temperature. After 0.5 h, *o*-nosyl chloride (20 mmol, 4.42 g, 2 equiv) was added and the stirring was continued for an additional 24 h. After completion (monitored by TLC), the reaction mixture was treated with CH<sub>2</sub>Cl<sub>2</sub> (20 mL) and water (10 mL), and stirred for 15 mins. The organic layer was separated and the aqueous solution was extracted using CH<sub>2</sub>Cl<sub>2</sub> (3 x 20 mL). The combined organic part was washed with water (10 mL) and dried (Na<sub>2</sub>SO<sub>4</sub>). Evaporation of the solvent gave a residue, which was purified using silica gel column chromatography (EtOAc : n-hexane = 1:9) to afford  $\alpha$ -methylene- $\beta$ -lactones **2a-f**.

### General Procedure for the Preparation of Methylene- $\beta$ -lactam **2g**.<sup>3a</sup>

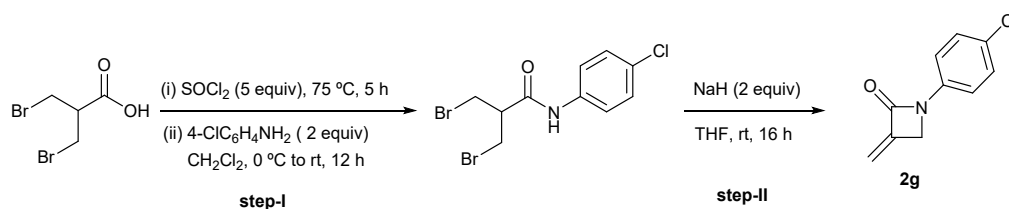

**Step-I.** 3-Bromo-2-bromomethylpropanoic acid (2 mmol, 500 mg, 1.0 equiv) was allowed to stir in SOCl<sub>2</sub> (10 mmol, 1 mL, 5 equiv) at 75 °C for 5 h. The resultant mixture was cooled to room temperature and the volatiles were evaporated. The residue was dissolved in CH<sub>2</sub>Cl<sub>2</sub> (5 mL) and the solution of 4-chloroaniline (4 mmol, 510 mg, 2.0 equiv) was added dropwise at 0 °C. The resultant mixture was allowed to stir at room temperature for 12 h. After completion (monitored by TLC), the reaction mixture was diluted with CH<sub>2</sub>Cl<sub>2</sub> (10 mL) and washed with 2 N HCl (2 mL). The residue was extracted with CH<sub>2</sub>Cl<sub>2</sub> (3 x 10 mL). The combined organic part was washed with water (10 mL) and dried (Na<sub>2</sub>SO<sub>4</sub>). Evaporation of the solvent gave a residue, which was purified using silica gel column chromatography (EtOAc: n-hexane = 1:4) to afford 3-bromo-2-bromomethylpropionamide in 55% (410 mg) yield.

**Step-II.** To a stirred solution of 3-bromo-2-(bromomethyl)-*N*-(4-chlorophenyl)propanamide (1.1 mmol, 400 mg, 1.0 equiv) in THF (5 mL), NaH (2.2 mmol, 88 mg, 60% dispersion in mineral oil, 2.0 equiv) was added portion wise at room temperature. The resultant mixture was allowed to stir for 16 h. After completion (monitored by TLC), the reaction mixture was quenched with saturated NH<sub>4</sub>Cl (3 mL). The solvent was evaporated and the residue was extracted with EtOAc (3 x 10 mL). The combined organic part was washed with water (10 mL)

and dried (Na<sub>2</sub>SO<sub>4</sub>). Evaporation of the solvent gave a residue that was purified using silica gel column chromatography (EtOAc : n-hexane = 1:9) to afford **2g** in 57% (124 mg) yield.

### General Procedure for the Rh-Catalyzed C-H Annulation of Sulfoxonium Ylides with $\alpha$ -Methylene- $\beta$ -lactones.

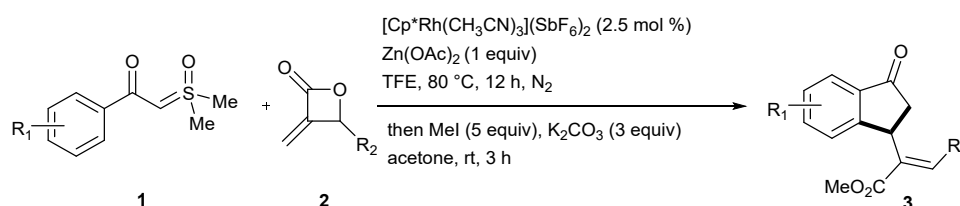

Sulfoxonium ylide **1** (0.1 mmol, 1.0 equiv),  $\alpha$ -methylene- $\beta$ -lactones **2** (0.15 mmol, 1.5 equiv), [Cp\*Rh(CH<sub>3</sub>CN)<sub>3</sub>](SbF<sub>6</sub>)<sub>2</sub> (0.0025 mmol, 2.1 mg, 0.025 equiv) and Zn(OAc)<sub>2</sub> (0.1 mmol, 18 mg, 1 equiv) were stirred in TFE (1 mL) at 80 °C for 12 h under N<sub>2</sub> atmosphere. After completion (monitored by TLC), the reaction mixture was cooled to room temperature and the solvent was evaporated under reduced pressure. The residue was treated with EtOAc (10 mL) and was washed with water (5 mL). Drying (Na<sub>2</sub>SO<sub>4</sub>) and evaporation of the solvent gave a residue that was stirred with K<sub>2</sub>CO<sub>3</sub> (0.3 mmol, 41 mg, 3.0 equiv) and MeI (0.5 mmol, 33  $\mu$ L, 5.0 equiv) in acetone (2 mL) at room temperature for 3 h. After completion (monitored by TLC), the solvent was evaporated and the residue was extracted using EtOAc (2 x 10 mL). The combined organic part was washed with water (10 mL). Drying (Na<sub>2</sub>SO<sub>4</sub>) and evaporated to give a residue that was purified on silica gel column chromatography (EtOAc : n-hexane = 1:9) to afford the annulated **3**.

**Scale-up Synthesis of 3aa.** 2-(Dimethyl(oxo)-l6-sulfaneylidene)-1-phenylethan-1-one **1a** (2 mmol, 392 mg, 1.0 equiv), 3-methylene-4-phenethyloxetan-2-one **2a** (3 mmol, 564 mg, 1.5 equiv), [Cp\*Rh(CH<sub>3</sub>CN)<sub>3</sub>](SbF<sub>6</sub>)<sub>2</sub> (0.05 mmol, 42 mg, 0.025 equiv) and Zn(OAc)<sub>2</sub> (2 mmol, 366 mg, 1 equiv) were stirred in TFE (15 mL) at 80 °C for 12 h under N<sub>2</sub> atmosphere. After completion (monitored by TLC), the reaction mixture was cooled to room temperature and the solvent was evaporated under reduced pressure. The residue was treated with EtOAc (50 mL) and was washed with water (10 mL). Drying (Na<sub>2</sub>SO<sub>4</sub>) and evaporation of the solvent gave a residue that was stirred with K<sub>2</sub>CO<sub>3</sub> (6 mmol, 828 mg, 3.0 equiv) and MeI (10 mmol, 0.6 mL, 5.0 equiv) in acetone (30 mL) at room temperature for 3 h. The purification was carried out as described in the above general procedure to furnish **3aa** in 69% (441 mg) yield.

## General Procedure for the Rh-Catalyzed C-H Allylation of Sulfoxonium Ylides with $\alpha$ -Methylene- $\beta$ -lactones.

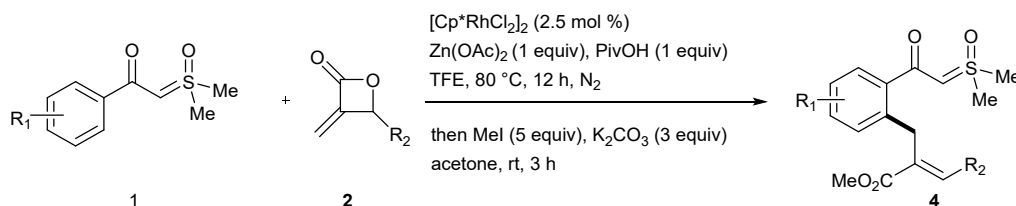

Sulfoxonium ylide **1** (0.1 mmol, 1.0 equiv),  $\alpha$ -methylene- $\beta$ -lactones **2** (0.15 mmol, 1.5 equiv),  $[Cp^*RhCl_2]_2$  (0.0025 mmol, 1.5 mg, 0.025 equiv),  $Zn(OAc)_2$  (0.1 mmol, 18 mg, 1 equiv) and PivOH (0.1 mmol, 10 mg, 1 equiv) were stirred in TFE (1 mL) at 80 °C for 12 h under  $N_2$  atmosphere. After completion (monitored by TLC), the reaction mixture was cooled to room temperature and the solvent was evaporated under reduced pressure. The residue was treated with EtOAc (10 mL) and was washed with water (5 mL). Drying ( $Na_2SO_4$ ) and evaporation of the solvent gave a residue that was stirred with  $K_2CO_3$  (0.3 mmol, 41 mg, 3.0 equiv) and MeI (0.5 mmol, 33  $\mu$ L, 5.0 equiv) in acetone (2 mL) at room temperature for 3 h. After completion (monitored by TLC), the solvent was evaporated and the residue was extracted using EtOAc (2 x 10 mL). The combined organic was washed with water (10 mL), dried ( $Na_2SO_4$ ) and evaporated to give a residue that was purified on silica gel column chromatography (EtOAc : n-hexane = 3:1) to afford the allylated **4**.

**Scale-up Synthesis of 4aa.** 2-(Dimethyl(oxo)-16-sulfaneylidene)-1-phenylethan-1-one **1a** (2 mmol, 392 mg, 1.0 equiv), 3-methylene-4-phenethyloxetan-2-one **2a** (3 mmol, 564 mg, 1.5 equiv),  $[Cp^*RhCl_2]_2$  (0.05 mmol, 31 mg, 0.025 equiv),  $Zn(OAc)_2$  (2 mmol, 366 mg, 1 equiv) and PivOH (2 mmol, 204 mg, 1 equiv) were stirred in TFE (15 mL) at 80 °C for 12 h under  $N_2$  atmosphere. Evaporation of the solvent gave a residue was treated with EtOAc (50 mL) and washed with water (10 mL). Drying ( $Na_2SO_4$ ) and evaporation of the solvent gave a residue that was stirred with  $K_2CO_3$  (6 mmol, 828 mg, 3.0 equiv) and MeI (10 mmol, 0.6 mL, 5.0 equiv) in acetone (30 mL) at room temperature for 3 h. The purification was performed as described in the above general procedure to furnish **4aa** in 73% (581 mg) yield.

### Synthesis of **6**.<sup>4b</sup>

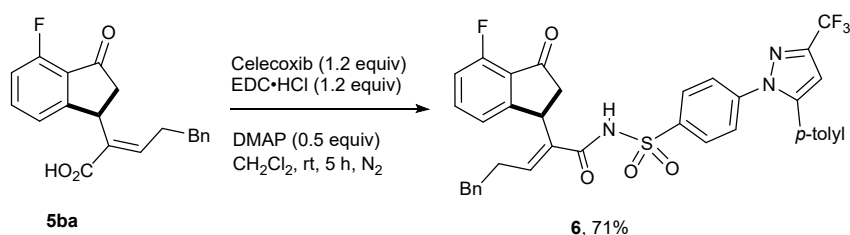

To a stirred solution of **5ba** (0.1 mmol, 33 mg, 1 equiv) in  $\text{CH}_2\text{Cl}_2$  (1.5 mL) under  $\text{N}_2$  atmosphere, celecoxib (0.12 mmol, 46 mg, 1.2 equiv), EDC·HCl (0.12 mmol, 23 mg, 1.2 equiv) and DMAP (0.05 mmol, 6 mg, 0.5 equiv) were added and the stirring was continued for 5 h at room temperature. After completion (monitored by TLC), the reaction mixture was quenched with 1 N HCl (1 mL). The organic layer was separated and the aqueous solution was extracted using EtOAc (2 x 10 mL). The combined organic solution was washed with saturated  $\text{NaHCO}_3$  (5 mL) and water (5 mL). Drying ( $\text{Na}_2\text{SO}_4$ ) and evaporation of the solvent gave a residue that was purified on silica gel column chromatography (EtOAc : n-hexane = 4:1) to afford **6** in 71% (48 mg) yield.

### Synthesis of **7a**.<sup>4c</sup>

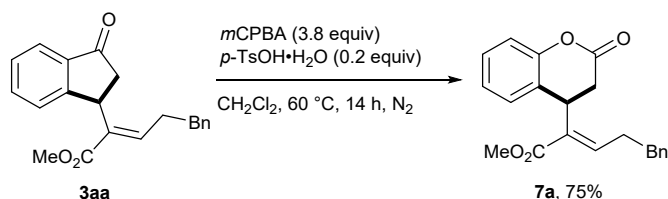

Compound **3aa** (0.1 mmol, 32 mg, 1 equiv), *m*CPBA (0.38 mmol, 65 mg, 3.8 equiv) and *p*-TsOH·H<sub>2</sub>O (0.02 mmol, 4 mg, 0.2 equiv) in  $\text{CH}_2\text{Cl}_2$  (1.5 mL) were stirred at 60 °C for 12 h under  $\text{N}_2$  atmosphere. After completion (monitored by TLC), the reaction mixture was quenched using saturated  $\text{NaHCO}_3$  (1 mL) and saturated  $\text{Na}_2\text{S}_2\text{O}_3$  (1 mL). The residue was extracted with  $\text{CH}_2\text{Cl}_2$  (2 x 10 mL). The combined organic part was washed with water (5 mL) and dried ( $\text{Na}_2\text{SO}_4$ ). Evaporation of the solvent gave a residue that was purified using silica gel column chromatography (EtOAc : n-hexane = 1:9) to afford **7a** in 75% (25 mg) yield.

### Synthesis of **7b**.<sup>4c</sup>

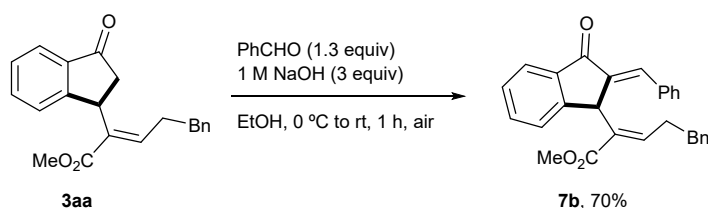

To a stirred solution of 1 M NaOH (0.3 mmol, 20  $\mu$ L, 3 equiv) and EtOH (1 mL), **3aa** (0.1 mmol, 32 mg, 1 equiv) and benzaldehyde (0.13 mmol, 14 mg, 1.3 equiv) were added at 0 °C and the resultant mixture was stirred for 1 h at room temperature under air. After completion (monitored by TLC), evaporation of the solvent gave a residue that was extracted using EtOAc (2 x 10 mL). The combined organic solution was washed with water (5 mL) and dried ( $\text{Na}_2\text{SO}_4$ ). Evaporation of the solvent gave a residue that was purified using silica gel column chromatography (EtOAc : n-hexane = 1:9) to afford **7b** in 70% (29 mg) yield.

#### Synthesis of **7c**.<sup>4c</sup>

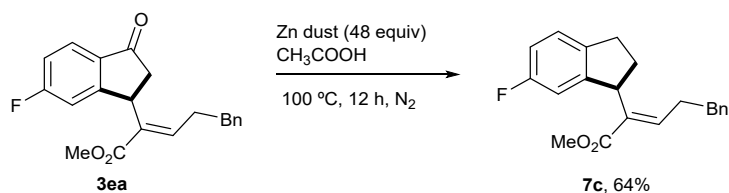

Compound **3ea** (0.1 mmol, 34 mg, 1 equiv), Zn dust (4.8 mmol, 314 mg, 48 equiv) and  $\text{CH}_3\text{COOH}$  (0.5 mL), were stirred at 100 °C for 12 h under  $\text{N}_2$  atmosphere. After completion (monitored by TLC), the resultant mixture was cooled to room temperature and diluted with EtOAc (10 mL), and passed through a short pad of celite. Evaporation of the solvent gave a residue that was purified on silica gel column chromatography (EtOAc : n-hexane = 1:9) to afford **7c** in 64% (21 mg) yield.

#### Synthesis of **8**.<sup>4d</sup>

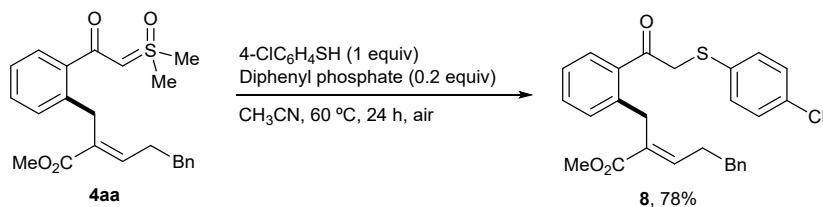

To a stirred solution of **4aa** (0.1 mmol, 40 mg, 1 equiv) in  $\text{CH}_3\text{CN}$  (1.5 mL), 4-chlorothiophenol (0.1 mmol, 14 mg, 1 equiv) and diphenyl phosphate (0.02 mmol, 5 mg, 0.2 equiv) were added and the resultant mixture was allowed to stir at 60 °C for 24 h under air. After completion (monitored by TLC), the reaction mixture was allowed to cool to room temperature, diluted with EtOAc (10 mL) and passed through a short celite pad. Evaporation of the solvent gave a residue that was purified using silica gel column chromatography (EtOAc : n-hexane = 1:7) to afford **8** in 78% (36 mg) yield.



## Synthesis of 9.<sup>4a</sup>

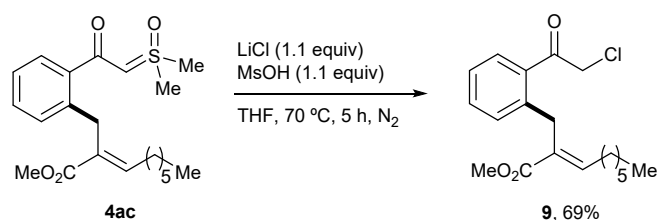

To a stirred solution of **4ac** (0.1 mmol, 38 mg, 1 equiv) in THF (1.5 mL), LiCl (0.11 mmol, 6 mg, 1.1 equiv) and MsOH (0.11 mmol, 11 mg, 1.1 equiv) were added at 0 °C under N<sub>2</sub> atmosphere. The resultant mixture was allowed to stir at 70 °C for 5 h. After completion (monitored by TLC), the reaction mixture was cooled to room temperature and the solvent was evaporated. The residue was extracted using EtOAc (2 x 10 mL) and the combined organic part was washed with water (5 mL) and dried (Na<sub>2</sub>SO<sub>4</sub>). Evaporation of the solvent gave a residue, which was purified using silica gel column chromatography (EtOAc : n-hexane = 1:7) to afford **9** in 69% (23 mg) yield.

## Characterization Data of the Products

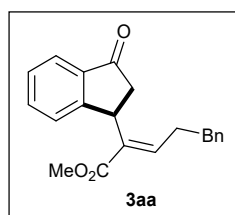

### Methyl (E)-2-(3-oxo-2,3-dihydro-1H-inden-1-yl)-5-phenylpent-2-

**enoate 3aa.** Analytical TLC on silica gel, 1:9 EtOAc : n-hexane  $R_f$  = 0.40; colorless liquid; yield 75% (25 mg); <sup>1</sup>H NMR (400 MHz, CDCl<sub>3</sub>)  $\delta$  7.75 (d,  $J$  = 7.6 Hz, 1H), 7.50-7.46 (m, 1H), 7.35 (t,  $J$  = 7.6 Hz, 1H), 7.32-7.28 (m, 2H), 7.25-7.21 (m, 1H), 7.17 (d,  $J$  = 6.8 Hz, 2H), 7.04 (t,  $J$  = 7.6 Hz, 1H), 6.98 (d,  $J$  = 7.6 Hz, 1H), 4.44-4.41 (m, 1H), 3.50 (s, 3H), 2.88-2.79 (m, 2H), 2.73-2.62 (m, 3H), 2.59 (dd,  $J$  = 19.2, 4.0 Hz, 1H); <sup>13</sup>C NMR (100 MHz, CDCl<sub>3</sub>)  $\delta$  205.9, 166.7, 156.7, 144.2, 140.6, 137.0, 134.7, 132.9, 128.7, 128.6, 127.6, 126.5, 125.0, 123.6, 51.7, 42.8, 36.7, 35.1, 30.8; FT-IR (neat) 1743, 1721, 1373, 1236, 1045 cm<sup>-1</sup>; HRMS (ESI-TOF)  $m/z$  [M+H]<sup>+</sup> calcd for C<sub>21</sub>H<sub>21</sub>O<sub>3</sub>: 321.1485; Found 321.1488.

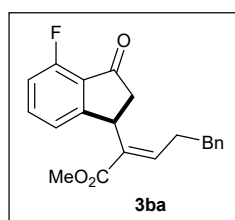

### Methyl (E)-2-(4-fluoro-3-oxo-2,3-dihydro-1H-inden-1-yl)-5-phenyl-

**pent-2-enoate 3ba.** Analytical TLC on silica gel, 1:9 EtOAc : n-hexane  $R_f$  = 0.42; yellow liquid; yield 81% (28 mg); <sup>1</sup>H NMR (400 MHz, CDCl<sub>3</sub>)  $\delta$  7.45-7.40 (m, 1H), 7.30 (t,  $J$  = 7.6

Hz, 2H), 7.25-7.21 (m, 1H), 7.18 (d,  $J = 7.2$  Hz, 2H), 7.06 (t,  $J = 8.0$  Hz, 1H), 6.95 (t,  $J = 8.8$  Hz, 1H), 6.68 (d,  $J = 7.6$  Hz, 1H), 4.39-4.36 (m, 1H), 3.52 (s, 3H), 2.89-2.81 (m, 2H), 2.71-2.62 (m, 3H), 2.61 (dd,  $J = 13.6, 4.4$  Hz, 1H);  $^{13}\text{C}$  NMR (100 MHz,  $\text{CDCl}_3$ )  $\delta$  202.0, 166.4, 160.2 ( $J_{\text{C-F}} = 242.9$  Hz), 159.0 ( $J_{\text{C-F}} = 2.3$  Hz), 144.6, 140.6, 136.6 ( $J_{\text{C-F}} = 8.2$  Hz), 132.3, 128.8, 128.6, 126.6, 124.7 ( $J_{\text{C-F}} = 12.9$  Hz), 120.8 ( $J_{\text{C-F}} = 4.1$  Hz), 114.7 ( $J_{\text{C-F}} = 19.3$  Hz), 51.8, 43.2, 36.7, 35.0, 30.8;  $^{19}\text{F}$  NMR (470 MHz,  $\text{CDCl}_3$ )  $\delta$  -115.1; FT-IR (neat) 1765, 1745, 1342, 1232, 1029  $\text{cm}^{-1}$ ; HRMS (ESI-TOF)  $m/z$   $[\text{M}+\text{H}]^+$  calcd for  $\text{C}_{21}\text{H}_{20}\text{FO}_3$ : 339.1391; Found 339.1376.

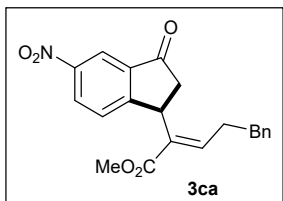

**Methyl (*E*)-2-(5-nitro-3-oxo-2,3-dihydro-1H-inden-1-yl)-5-phenylpent-2-enoate 3ca.** Analytical TLC on silica gel, 1:9 EtOAc : n-hexane  $R_f = 0.38$ ; colorless liquid; yield 77% (29 mg);  $^1\text{H}$  NMR (400 MHz,  $\text{CDCl}_3$ )  $\delta$  8.52 (s, 1H), 8.27 (d,  $J = 8.4$  Hz, 1H), 7.34-7.27 (m, 3H), 7.20 (d,  $J = 7.2$  Hz, 2H), 7.12 (t,  $J = 7.6$  Hz, 1H), 6.84 (d,  $J = 8.4$  Hz, 1H), 4.42-4.38 (m, 1H), 3.51 (s, 3H), 2.91 (t,  $J = 6.8$  Hz, 2H), 2.77-2.70 (m, 3H), 2.64 (dd,  $J = 19.2, 4.0$  Hz, 1H);  $^{13}\text{C}$  NMR (100 MHz,  $\text{CDCl}_3$ )  $\delta$  203.4, 166.0, 162.3, 148.0, 145.3, 140.5, 138.0, 131.6, 128.9, 128.8, 126.8, 126.0, 119.0, 51.9, 43.1, 37.0, 35.0, 31.1; FT-IR (neat) 1766, 1747, 1369, 1226, 1040  $\text{cm}^{-1}$ ; HRMS (ESI-TOF)  $m/z$   $[\text{M}+\text{H}]^+$  calcd for  $\text{C}_{21}\text{H}_{20}\text{NO}_5$ : 366.1336; Found 366.1316.

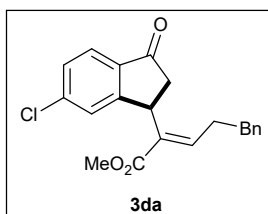

**Methyl (*E*)-2-(6-chloro-3-oxo-2,3-dihydro-1H-inden-1-yl)-5-phenylpent-2-enoate 3da.** Analytical TLC on silica gel, 1:9 EtOAc : n-hexane  $R_f = 0.40$ ; colorless liquid; yield 70% (25 mg);  $^1\text{H}$  NMR (400 MHz,  $\text{CDCl}_3$ )  $\delta$  7.67 (d,  $J = 8.0$  Hz, 1H), 7.33-7.30 (m, 3H), 7.27-7.25 (m, 1H), 7.18 (d,  $J = 7.2$  Hz, 2H), 7.07 (t,  $J = 8.0$  Hz, 1H), 6.86 (s, 1H), 4.34-4.31 (m, 1H), 3.52 (s, 3H), 2.86 (t,  $J = 8.0$  Hz, 2H), 2.70-2.63 (m, 3H), 2.57 (dd,  $J = 19.2, 4.0$  Hz, 1H);  $^{13}\text{C}$  NMR (100 MHz,  $\text{CDCl}_3$ )  $\delta$  204.4, 166.3, 158.2, 144.8, 141.2, 140.5, 135.5, 132.2, 128.8, 128.6, 128.4, 126.8, 125.2, 124.7, 51.8, 42.8, 36.5, 35.0, 30.9; FT-IR (neat) 1778, 1745, 1368, 1230, 1029  $\text{cm}^{-1}$ ; HRMS (ESI-TOF)  $m/z$   $[\text{M}+\text{H}]^+$  calcd for  $\text{C}_{21}\text{H}_{20}\text{ClO}_3$ : 355.1095; Found 355.1080.

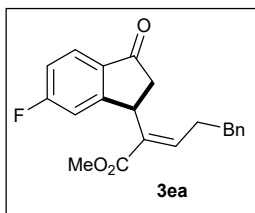

**Methyl (E)-2-(6-fluoro-3-oxo-2,3-dihydro-1H-inden-1-yl)-5-phenylpent-2-enoate 3ea.** Analytical TLC on silica gel, 1:9 EtOAc : n-hexane  $R_f$  = 0.40; yellow sticky liquid; yield 68% (23 mg);  $^1\text{H}$  NMR (400 MHz,  $\text{CDCl}_3$ )  $\delta$  7.74-7.71 (m, 1H), 7.31 (t,  $J$  = 6.8 Hz, 2H), 7.24-7.22 (m, 1H), 7.17 (d,  $J$  = 7.2 Hz, 2H), 7.06 (t,  $J$  = 7.6 Hz, 1H), 7.02-6.99 (m, 1H), 6.51 (d,  $J$  = 8.0 Hz, 1H), 4.35-4.32 (m, 1H), 3.52 (s, 3H), 2.85 (t,  $J$  = 6.8 Hz, 2H), 2.72-2.67 (m, 2H), 2.63-2.55 (m, 2H);  $^{13}\text{C}$  NMR (125 MHz,  $\text{CDCl}_3$ )  $\delta$  204.0, 168.2 ( $J_{\text{C-F}}$  = 203.7 Hz), 166.4, 159.8 ( $J_{\text{C-F}}$  = 7.5 Hz), 144.7, 140.5, 133.3, 132.2, 128.8, 128.6, 126.8, 125.9 ( $J_{\text{C-F}}$  = 8.3 Hz), 115.89 ( $J_{\text{C-F}}$  = 18.9 Hz), 111.8 ( $J_{\text{C-F}}$  = 17.8 Hz), 51.8, 43.0, 36.6, 35.0, 30.9;  $^{19}\text{F}$  NMR (470 MHz,  $\text{CDCl}_3$ )  $\delta$  -102.9; FT-IR (neat) 1784, 1744, 1362, 1239, 1039  $\text{cm}^{-1}$ ; HRMS (ESI-TOF)  $m/z$   $[\text{M}+\text{H}]^+$  calcd for  $\text{C}_{21}\text{H}_{20}\text{FO}_3$ : 339.1391; Found 339.1382.

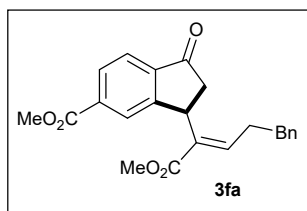

**Methyl (E)-3-(1-methoxy-1-oxo-5-phenylpent-2-en-2-yl)-1-oxo-2,3-dihydro-1H-indene-5-carboxylate 3fa.** Analytical TLC on silica gel, 1:9 EtOAc : n-hexane  $R_f$  = 0.43; yellow liquid; yield 73% (27 mg);  $^1\text{H}$  NMR (400 MHz,  $\text{CDCl}_3$ )  $\delta$  8.03 (d,  $J$  = 8.0 Hz, 1H), 7.80-7.78 (m, 2H), 7.31 (t,  $J$  = 7.2 Hz, 2H), 7.24-7.20 (m, 1H), 7.18 (d,  $J$  = 7.2 Hz, 2H), 7.08 (t,  $J$  = 8.0 Hz, 1H), 4.43-4.41 (m, 1H), 3.94 (s, 3H), 3.49 (s, 3H), 2.95-2.88 (m, 1H), 2.84-2.77 (m, 1H), 2.72-2.64 (m, 3H), 2.59 (dd,  $J$  = 18.8, 4.0 Hz, 1H);  $^{13}\text{C}$  NMR (100 MHz,  $\text{CDCl}_3$ )  $\delta$  205.2, 166.5, 166.4, 156.5, 144.7, 140.5, 140.3, 135.6, 132.4, 129.0, 128.8, 128.6, 126.6, 126.4, 123.6, 52.6, 51.7, 43.1, 36.8, 35.0, 30.8; FT-IR (neat) 1782, 1741, 1753, 1372, 1231, 1038  $\text{cm}^{-1}$ ; HRMS (ESI-TOF)  $m/z$   $[\text{M}+\text{H}]^+$  calcd for  $\text{C}_{23}\text{H}_{23}\text{O}_5$ : 379.1540; Found 379.1521.

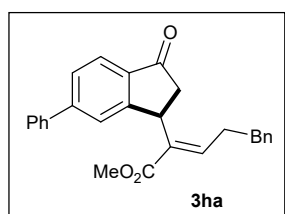

**Methyl (E)-2-(3-oxo-6-phenyl-2,3-dihydro-1H-inden-1-yl)-5-phenylpent-2-enoate 3ha.** Analytical TLC on silica gel, 1:9 EtOAc : n-hexane  $R_f$  = 0.35; yellow liquid; yield 69% (27 mg);  $^1\text{H}$  NMR (500 MHz,  $\text{CDCl}_3$ )  $\delta$  7.79 (d,  $J$  = 7.5 Hz, 1H), 7.57-7.56 (m, 1H), 7.54-7.52 (m, 2H), 7.43 (t,  $J$  = 7.0 Hz, 2H), 7.40-7.36 (m, 1H), 7.24-7.23

(m, 3H), 7.14-7.13 (m, 3H), 7.04 (t,  $J = 7.5$  Hz, 1H), 4.46-4.44 (m, 1H), 3.50 (s, 3H), 2.86-2.78 (m, 2H), 2.74-2.69 (m, 1H), 2.65-2.56 (m, 3H);  $^{13}\text{C}$  NMR (125 MHz,  $\text{CDCl}_3$ )  $\delta$  205.4, 166.7, 157.5, 147.8, 144.3, 140.6, 140.2, 135.9, 132.9, 129.0, 128.7, 128.5, 128.4, 127.7, 127.1, 126.6, 124.0, 123.4, 51.7, 43.2, 36.8, 35.0, 30.8; FT-IR (neat) 1784, 1738, 1365, 1236, 1042  $\text{cm}^{-1}$ ; HRMS (ESI-TOF)  $m/z$   $[\text{M}+\text{H}]^+$  calcd for  $\text{C}_{27}\text{H}_{25}\text{O}_3$ : 397.1798; Found 397.1780.

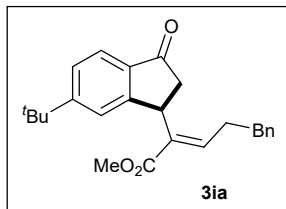

**Methyl (E)-2-(6-(tert-butyl)-3-oxo-2,3-dihydro-1H-inden-1-yl)-5-phenylpent-2-enoate 3ia.** Analytical TLC on silica gel, 1:9 EtOAc : n-hexane  $R_f = 0.42$ ; colorless liquid; yield 63% (24 mg);  $^1\text{H}$  NMR (400 MHz,  $\text{CDCl}_3$ )  $\delta$  7.70 (d,  $J = 8.0$  Hz, 1H), 7.43 (d,  $J = 8.0$  Hz, 1H), 7.29 (t,  $J = 6.8$  Hz, 2H), 7.23-7.19 (m, 1H), 7.17 (s, 1H), 7.13 (d,  $J = 7.2$  Hz, 2H), 7.03 (t,  $J = 8.0$  Hz, 1H), 4.46-4.43 (m, 1H), 3.52 (s, 3H), 2.86-2.79 (m, 1H), 2.77-2.69 (m, 2H), 2.59-2.50 (m, 3H), 1.30 (s, 9H);  $^{13}\text{C}$  NMR (125 MHz,  $\text{CDCl}_3$ )  $\delta$  205.5, 167.1, 159.1, 157.1, 144.1, 140.7, 134.7, 133.2, 128.7, 128.5, 126.6, 125.4, 123.4, 121.5, 51.7, 43.5, 36.9, 35.6, 35.1, 31.4, 30.8; FT-IR (neat) 1781, 1742, 1365, 1239, 1041  $\text{cm}^{-1}$ ; HRMS (ESI-TOF)  $m/z$   $[\text{M}+\text{H}]^+$  calcd for  $\text{C}_{25}\text{H}_{29}\text{O}_3$ : 377.2111; Found 377.2092.

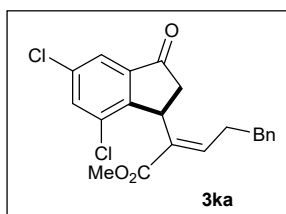

**Methyl (E)-2-(5,7-dichloro-3-oxo-2,3-dihydro-1H-inden-1-yl)-5-phenylpent-2-enoate 3ka.** Analytical TLC on silica gel, 1:9 EtOAc : n-hexane  $R_f = 0.45$ ; yellow liquid; yield 80% (32 mg);  $^1\text{H}$  NMR (400 MHz,  $\text{CDCl}_3$ )  $\delta$  7.64-7.63 (m, 1H), 7.54-7.53 (m, 1H), 7.28 (s, 1H), 7.24 (s, 1H), 7.20-7.17 (m, 1H), 7.13 (d,  $J = 6.8$  Hz, 2H), 5.89 (t,  $J = 7.2$  Hz, 1H), 4.36-4.33 (m, 1H), 3.64 (s, 3H), 3.04 (dd,  $J = 20.0, 8.4$  Hz, 1H), 2.85-2.79 (m, 2H), 2.73-2.69 (m, 2H), 2.62 (dd,  $J = 19.2, 2.4$  Hz, 1H);  $^{13}\text{C}$  NMR (100 MHz,  $\text{CDCl}_3$ )  $\delta$  203.2, 166.7, 150.5, 144.7, 141.0, 140.7, 135.4, 134.8, 134.0, 131.5, 128.6, 128.5, 126.2, 122.1, 51.6, 45.5, 42.4, 35.2, 31.4; FT-IR (neat) 1764, 1726, 1365, 1232, 1055  $\text{cm}^{-1}$ ; HRMS (ESI-TOF)  $m/z$   $[\text{M}+\text{H}]^+$  calcd for  $\text{C}_{21}\text{H}_{19}\text{Cl}_2\text{O}_3$ : 389.0706; Found 389.0684.

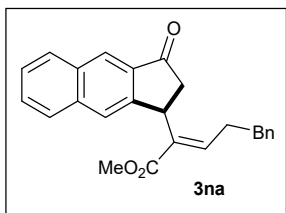

**Methyl (E)-2-(3-oxo-2,3-dihydro-1H-cyclopenta[b]naphthalen-1-yl)-5-phenylpent-2-enoate 3na.** Analytical TLC on silica gel, 1:9 EtOAc : n-hexane  $R_f$  = 0.35; colorless liquid; yield 60% (23 mg);  $^1\text{H}$  NMR (400 MHz,  $\text{CDCl}_3$ )  $\delta$  8.30 (s, 1H), 7.98 (d,  $J$  = 8.4 Hz, 1H), 7.77 (d,  $J$  = 8.0 Hz, 1H), 7.58-7.53 (m 1H), 7.50-7.46 (m, 1H), 7.34-7.30 (m, 4H), 7.20 (d,  $J$  = 7.2 Hz, 2H), 7.08 (t,  $J$  = 8.0 Hz, 1H), 4.59-4.56 (m, 1H), 3.45 (s, 3H), 2.92-2.87 (m, 2H), 2.83-2.72 (m, 3H), 2.70 (dd,  $J$  = 18.8, 4.4 Hz, 1H);  $^{13}\text{C}$  NMR (125 MHz,  $\text{CDCl}_3$ )  $\delta$  206.3, 166.7, 149.9, 143.8, 140.7, 137.2, 134.8, 133.6, 132.6, 130.6, 128.8, 128.7, 128.6, 128.0, 126.6, 126.3, 124.3, 123.4, 51.7, 43.4, 36.3, 35.2, 30.9; FT-IR (neat) 1772, 1735, 1361, 1234, 1041  $\text{cm}^{-1}$ ; HRMS (ESI-TOF)  $m/z$   $[\text{M}+\text{H}]^+$  calcd for  $\text{C}_{25}\text{H}_{23}\text{O}_3$ : 371.1642; Found 371.1620.

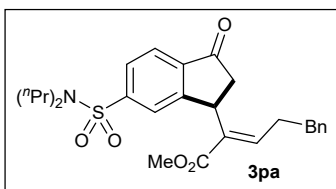

**Methyl (E)-2-(6-(N,N-dipropylsulfamoyl)-3-oxo-2,3-dihydro-1H-inden-1-yl)-5-phenylpent-2-enoate 3pa.** Analytical TLC on silica gel, 1:9 EtOAc : n-hexane  $R_f$  = 0.34; yellow liquid; yield 71% (34 mg);  $^1\text{H}$  NMR (400 MHz,  $\text{CDCl}_3$ )  $\delta$  7.86-7.84 (m, 1H), 7.81-7.79 (m, 2H), 7.30 (t,  $J$  = 7.6 Hz, 2H), 7.22 (d,  $J$  = 7.2 Hz, 1H), 7.18 (d,  $J$  = 7.2 Hz, 2H), 6.11 (t,  $J$  = 7.2 Hz, 1H), 4.29-4.26 (m, 1H), 3.55 (s, 3H), 3.13-3.06 (m, 4H), 3.04-2.99 (m, 1H), 2.87-2.82 (m, 2H), 2.77-2.74 (m, 2H), 2.71 (dd,  $J$  = 19.6, 3.6 Hz, 1H), 1.52 (q,  $J$  = 7.2 Hz, 4H), 0.86 (t,  $J$  = 7.2 Hz, 6H);  $^{13}\text{C}$  NMR (100 MHz,  $\text{CDCl}_3$ )  $\delta$  204.4, 166.6, 156.7, 146.1, 145.1, 140.9, 139.7, 132.8, 128.6, 128.7, 126.5, 126.4, 124.9, 124.4, 51.5, 49.9, 44.5, 44.0, 35.4, 31.5, 21.9, 11.3; FT-IR (neat) 1772, 1733, 1365, 1240, 1044, 852  $\text{cm}^{-1}$ ; HRMS (ESI-TOF)  $m/z$   $[\text{M}+\text{H}]^+$  calcd for  $\text{C}_{27}\text{H}_{34}\text{NO}_5\text{S}$ : 484.2152; Found 484.2138.

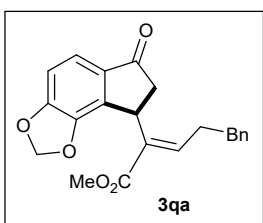

**Methyl (E)-2-(6-oxo-7,8-dihydro-6H-indeno[4,5-d][1,3]dioxol-8-yl)-5-phenylpent-2-enoate 3qa.** Analytical TLC on silica gel, 1:9 EtOAc : n-hexane  $R_f$  = 0.38; colorless liquid; yield 67% (24 mg);  $^1\text{H}$  NMR (400 MHz,  $\text{CDCl}_3$ )  $\delta$  7.40 (d,  $J$  = 8.0 Hz, 1H), 7.29 (t,  $J$  = 7.2 Hz, 2H), 7.23-7.20 (m, 1H), 7.17 (d,  $J$  = 6.8 Hz, 2H), 7.01 (t,  $J$  = 8.0 Hz, 1H), 6.86 (d,  $J$  = 8.0 Hz, 1H), 6.00-5.99 (m, 2H), 4.48-4.45 (m, 1H), 3.57 (s, 3H), 2.91-2.83 (m,

1H), 2.79-2.64 (m, 4H), 2.54 (dd,  $J = 18.8, 3.2$  Hz, 1H);  $^{13}\text{C}$  NMR (100 MHz,  $\text{CDCl}_3$ )  $\delta$  203.6, 166.7, 152.8, 144.3, 143.7, 140.9, 135.6, 133.1, 131.3, 128.7, 128.5, 126.5, 119.0, 108.9, 102.3, 51.8, 43.2, 34.9, 33.4, 30.7; FT-IR (neat) 1763, 1735, 1372, 1235, 1043  $\text{cm}^{-1}$ ; HRMS (ESI-TOF)  $m/z$   $[\text{M}+\text{H}]^+$  calcd for  $\text{C}_{22}\text{H}_{21}\text{O}_5$ : 365.1384; Found 365.1363.

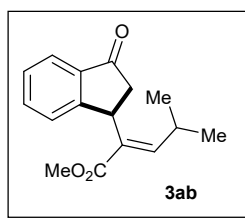

**Methyl (E)-4-methyl-2-(3-oxo-2,3-dihydro-1H-inden-1-yl)pent-2-**

**enoate 3ab.** Analytical TLC on silica gel, 1:9 EtOAc : n-hexane  $R_f = 0.48$ ; colorless liquid; yield 78% (20 mg);  $^1\text{H}$  NMR (400 MHz,  $\text{CDCl}_3$ )  $\delta$  7.79 (d,  $J = 7.6$  Hz, 1H), 7.55 (t,  $J = 7.6$  Hz, 1H), 7.38 (t,  $J = 7.6$  Hz, 1H), 7.27-7.25 (m, 1H), 6.84 (d,  $J = 10.0$  Hz, 1H), 4.57-4.54 (m, 1H), 3.51 (s, 3H), 2.96 (dd,  $J = 18.8, 8.0$  Hz, 1H), 2.77-2.73 (m, 2H), 1.18 (d,  $J = 6.4$  Hz, 3H), 1.06 (d,  $J = 6.4$  Hz, 3H);  $^{13}\text{C}$  NMR (100 MHz,  $\text{CDCl}_3$ )  $\delta$  206.0, 167.1, 157.0, 152.2, 137.0, 134.8, 129.9, 127.7, 125.0, 123.8, 51.7, 43.3, 36.9, 28.1, 22.8, 22.4; FT-IR (neat) 1964, 1742, 1372, 1234, 1041  $\text{cm}^{-1}$ ; HRMS (ESI-TOF)  $m/z$   $[\text{M}+\text{H}]^+$  calcd for  $\text{C}_{16}\text{H}_{19}\text{O}_3$ : 259.1329; Found 259.1323.

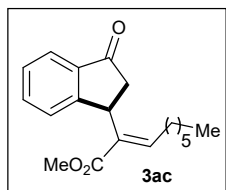

**Methyl (E)-2-(3-oxo-2,3-dihydro-1H-inden-1-yl)non-2-enoate 3ac.**

Analytical TLC on silica gel, 1:9 EtOAc : n-hexane  $R_f = 0.40$ ; colorless liquid; yield 88% (27 mg);  $^1\text{H}$  NMR (500 MHz,  $\text{CDCl}_3$ )  $\delta$  7.78 (d,  $J = 7.0$  Hz, 1H), 7.55 (t,  $J = 7.5$  Hz, 1H), 7.37 (t,  $J = 7.0$  Hz, 1H), 7.26 (s, 1H), 7.01 (t,  $J = 7.5$  Hz, 1H), 4.58-4.56 (m, 1H), 3.51 (s, 3H), 2.93 (dd,  $J = 19.0, 8.0$  Hz, 1H), 2.76 (d,  $J = 19.5$  Hz, 1H), 2.32-2.25 (m, 2H), 1.49 (q,  $J = 7.5$  Hz, 2H), 1.33-1.25 (m, 6H), 0.89 (t,  $J = 6.0$  Hz, 3H);  $^{13}\text{C}$  NMR (125 MHz,  $\text{CDCl}_3$ )  $\delta$  206.0, 166.9, 157.0, 146.0, 137.0, 134.8, 132.1, 127.7, 125.0, 123.7, 51.7, 43.1, 36.7, 31.7, 29.2, 29.0, 28.8, 22.7, 14.2; FT-IR (neat) 1738, 1719, 1370, 1246, 1054  $\text{cm}^{-1}$ ; HRMS (ESI-TOF)  $m/z$   $[\text{M}+\text{H}]^+$  calcd for  $\text{C}_{19}\text{H}_{25}\text{O}_3$ : 301.1798; Found 301.1790.

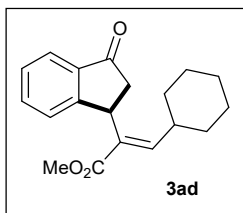

**Methyl (*E*)-3-cyclohexyl-2-(3-oxo-2,3-dihydro-1H-inden-1-yl)acrylate**

**3ad.** Analytical TLC on silica gel, 1:9 EtOAc : n-hexane  $R_f$  = 0.43; yellow liquid; yield 75% (23 mg);  $^1\text{H}$  NMR (400 MHz,  $\text{CDCl}_3$ )  $\delta$  7.79 (d,  $J$  = 7.6 Hz, 1H), 7.57-7.53 (m, 1H), 7.38 (t,  $J$  = 7.2 Hz, 1H), 7.27-7.25 (m, 1H), 6.85 (d,  $J$  = 10.0 Hz, 1H), 4.57-4.54 (m, 1H), 3.50 (s, 3H), 2.94 (dd,  $J$  = 18.8, 8.4 Hz, 1H), 2.77 (dd,  $J$  = 18.8, 4.0 Hz, 1H), 2.47-2.41 (m, 1H), 1.80-1.75 (m, 3H), 1.70-1.69 (m, 1H), 1.64-1.59 (m, 2H), 1.34-1.30 (m, 2H), 1.25 (s, 2H);  $^{13}\text{C}$  NMR (100 MHz,  $\text{CDCl}_3$ )  $\delta$  206.0, 167.1, 157.0, 150.8, 137.1, 134.7, 130.3, 127.7, 125.0, 123.7, 51.6, 43.4, 37.9, 37.0, 32.9, 32.4, 25.8, 25.6, 25.5; FT-IR (neat) 1775, 1736, 1373, 1236, 1044  $\text{cm}^{-1}$ ; HRMS (ESI-TOF)  $m/z$   $[\text{M}+\text{H}]^+$  calcd for  $\text{C}_{19}\text{H}_{23}\text{O}_3$ : 299.1642; Found 299.1635.

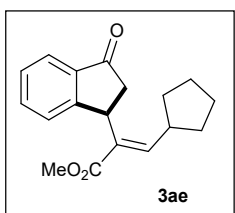

**Methyl (*E*)-3-cyclopentyl-2-(3-oxo-2,3-dihydro-1H-inden-1-yl)acrylate**

**3ae.** Analytical TLC on silica gel, 1:9 EtOAc : n-hexane  $R_f$  = 0.43; colorless liquid; yield 71% (21 mg);  $^1\text{H}$  NMR (400 MHz,  $\text{CDCl}_3$ )  $\delta$  7.78 (d,  $J$  = 7.6 Hz, 1H), 7.55 (t,  $J$  = 7.2 Hz, 1H), 7.37 (t,  $J$  = 7.6 Hz, 1H), 7.28 (s, 1H), 6.94 (d,  $J$  = 10.0 Hz, 1H), 4.61-4.58 (m, 1H), 3.51 (s, 3H), 2.94 (dd,  $J$  = 18.8, 8.0 Hz, 1H), 2.86-2.80 (m, 1H), 2.77 (dd,  $J$  = 18.8, 4.0 Hz, 1H), 1.99-1.92 (m, 1H), 1.84-1.73 (m, 3H), 1.69-1.62 (m, 2H), 1.55-1.48 (m, 1H), 1.44-1.37 (m, 1H);  $^{13}\text{C}$  NMR (100 MHz,  $\text{CDCl}_3$ )  $\delta$  206.1, 167.1, 157.1, 150.9, 137.0, 134.7, 130.5, 127.6, 125.1, 123.7, 51.7, 43.4, 39.4, 37.0, 34.0, 33.6, 25.8; FT-IR (neat) 1752, 1720, 1363, 1235, 1043  $\text{cm}^{-1}$ ; HRMS (ESI-TOF)  $m/z$   $[\text{M}+\text{H}]^+$  calcd for  $\text{C}_{18}\text{H}_{21}\text{O}_3$ : 285.1485; Found 285.1478.

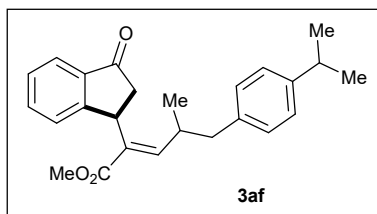

**Methyl (*E*)-5-(4-isopropylphenyl)-4-methyl-2-(3-oxo-2,3-**

**dihydro-1H-inden-1-yl)pent-2-enoate 3af.** Analytical TLC on silica gel, 1:9 EtOAc : n-hexane  $R_f$  = 0.41; colorless liquid; yield 73% (28 mg);  $^1\text{H}$  NMR (400 MHz,  $\text{CDCl}_3$ )  $\delta$  7.71 (d,  $J$  = 7.6 Hz, 1H), 7.35-7.29 (m, 2H), 7.18 (d,  $J$  = 7.6 Hz, 2H), 7.10 (d,  $J$  = 7.6 Hz, 2H), 6.85 (d,  $J$  = 10.4 Hz, 1H), 6.40 (d,  $J$  = 7.2 Hz, 1H), 4.36-4.33 (m, 1H), 3.47 (s, 3H), 2.95-2.88 (m, 2H), 2.84-2.77 (m, 2H), 2.69-2.63 (m, 1H), 2.55-2.50 (m, 1H), 1.28-1.25 (m, 6H), 1.12 (d,  $J$  = 7.2

Hz, 3H);  $^{13}\text{C}$  NMR (100 MHz,  $\text{CDCl}_3$ )  $\delta$  206.0, 166.9, 156.8, 150.4, 147.2, 137.3, 136.9, 134.5, 131.0, 129.1, 127.5, 126.8, 125.0, 123.4, 51.6, 43.3, 43.1, 36.8, 36.4, 33.9, 24.3, 24.2, 20.9; FT-IR (neat) 1763, 1732, 1371, 1236, 1045  $\text{cm}^{-1}$ ; HRMS (ESI-TOF)  $m/z$   $[\text{M}+\text{H}]^+$  calcd for  $\text{C}_{25}\text{H}_{29}\text{O}_3$ : 377.2111; Found 377.2101.

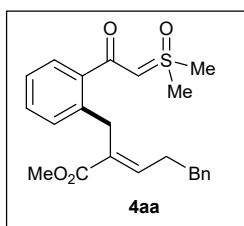

**Methyl (*E*)-2-(2-(2-(dimethyl(oxo)-16-sulfaneylidene)acetyl)benzyl)-5-**

**phenylpent-2-enoate 4aa.** Analytical TLC on silica gel, 3:1 EtOAc : n-hexane  $R_f$  = 0.30; yellow liquid; yield 80% (32 mg);  $^1\text{H}$  NMR (600 MHz,  $\text{CDCl}_3$ )  $\delta$  7.40 (d,  $J$  = 7.2 Hz, 1H), 7.27-7.24 (m, 2H), 7.18 (t,  $J$  = 6 Hz, 2H), 7.15-7.12 (m, 3H), 7.00 (t,  $J$  = 7.8 Hz, 1H), 6.94 (d,  $J$  = 7.2 Hz, 1H), 4.68 (s, 1H), 3.94 (s, 2H), 3.66 (s, 3H), 3.47 (s, 6H), 2.71 (t,  $J$  = 6.6 Hz, 2H), 2.51 (q,  $J$  = 7.8 Hz, 2H);  $^{13}\text{C}$  NMR (125 MHz,  $\text{CDCl}_3$ )  $\delta$  187.0, 168.4, 143.8, 141.2, 140.9, 137.1, 131.5, 129.2, 128.6, 128.5, 128.0, 127.5, 126.2, 125.7, 71.6, 51.9, 42.4, 34.9, 30.8, 29.5; FT-IR (neat) 1755, 1737, 1372, 1234, 1043  $\text{cm}^{-1}$ ; HRMS (ESI-TOF)  $m/z$   $[\text{M}+\text{H}]^+$  calcd for  $\text{C}_{23}\text{H}_{27}\text{O}_4\text{S}$ : 399.1625; Found 399.1625.

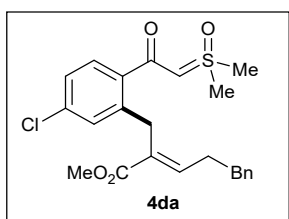

**Methyl (*E*)-2-(5-chloro-2-(2-(dimethyl(oxo)-16-sulfaneylidene)**

**acetyl)benzyl)-5-phenylpent-2-enoate 4da.** Analytical TLC on silica gel, 3:1 EtOAc : n-hexane  $R_f$  = 0.38; colorless liquid; yield 72% (31 mg);  $^1\text{H}$  NMR (400 MHz,  $\text{CDCl}_3$ )  $\delta$  7.34 (d,  $J$  = 8.4 Hz, 1H), 7.28-7.27 (m, 1H), 7.25 (s, 1H), 7.20 (d,  $J$  = 7.2 Hz, 1H), 7.14-7.11 (m, 3H), 7.03 (t,  $J$  = 7.6 Hz, 1H), 6.96-6.95 (m, 1H), 4.67 (s, 1H), 3.91 (s, 2H), 3.68 (s, 3H), 3.46 (s, 6H), 2.73 (t,  $J$  = 8.0 Hz, 2H), 2.50 (q,  $J$  = 7.6 Hz, 2H);  $^{13}\text{C}$  NMR (100 MHz,  $\text{CDCl}_3$ )  $\delta$  185.7, 168.1, 144.5, 141.0, 139.4, 139.3, 135.1, 130.8, 128.9, 128.6, 128.5, 128.1, 126.3, 125.9, 72.0, 52.0, 42.3, 34.8, 30.8, 29.4; FT-IR (neat) 1757, 1737, 1375, 1234, 1043  $\text{cm}^{-1}$ ; HRMS (ESI-TOF)  $m/z$   $[\text{M}+\text{H}]^+$  calcd for  $\text{C}_{23}\text{H}_{26}\text{ClO}_4\text{S}$ : 433.1235; Found 433.1233.



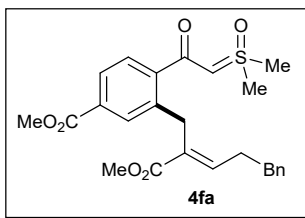

**Methyl (E)-4-(2-(dimethyloxylidene)acetyl)-3-(2-methoxycarbonyl)-5-phenylpent-2-en-1-yl benzoate 4fa.** Analytical TLC on silica gel, 3:1 EtOAc : n-hexane  $R_f$  = 0.35; yellow liquid; yield 76% (35 mg);  $^1\text{H}$  NMR (400 MHz,  $\text{CDCl}_3$ )  $\delta$  7.84 (d,  $J$  = 8.0 Hz, 1H), 7.70 (s, 1H), 7.45 (d,  $J$  = 8.0 Hz, 1H), 7.25-7.23 (m, 2H), 7.18 (d,  $J$  = 6.8 Hz, 1H), 7.14 (d,  $J$  = 7.6 Hz, 2H), 7.05 (t,  $J$  = 7.2 Hz, 1H), 4.70 (s, 1H), 3.93 (s, 2H), 3.88 (s, 3H), 3.67 (s, 3H), 3.49 (s, 6H), 2.74 (t,  $J$  = 7.6 Hz, 2H), 2.52 (q,  $J$  = 7.6 Hz, 2H);  $^{13}\text{C}$  NMR (100 MHz,  $\text{CDCl}_3$ )  $\delta$  185.8, 168.2, 166.9, 145.4, 144.3, 141.2, 137.5, 131.0, 130.6, 129.4, 128.6, 128.5, 127.5, 127.3, 126.3, 72.3, 52.2, 51.9, 42.5, 34.9, 30.9, 29.6; FT-IR (neat) 1765, 1736, 1723, 1372, 1234, 1043  $\text{cm}^{-1}$ ; HRMS (ESI-TOF)  $m/z$   $[\text{M}+\text{H}]^+$  calcd for  $\text{C}_{25}\text{H}_{29}\text{O}_6\text{S}$ : 457.1679; Found 457.1676.

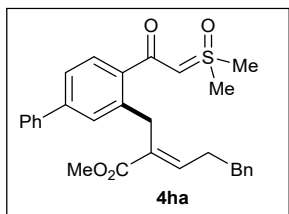

**Methyl (E)-2-((4-(2-(dimethyloxylidene)acetyl)-[1,1'-biphenyl]-3-yl)methyl)-5-phenylpent-2-enoate 4ha.** Analytical TLC on silica gel, 3:1 EtOAc : n-hexane  $R_f$  = 0.30; yellow liquid; yield 67% (33 mg);  $^1\text{H}$  NMR (400 MHz,  $\text{CDCl}_3$ )  $\delta$  7.51-7.48 (m, 2H), 7.41 (t,  $J$  = 7.2 Hz, 3H), 7.37-7.32 (m, 2H), 7.25-7.24 (m, 1H), 7.23 (d,  $J$  = 7.6 Hz, 2H), 7.16-7.14 (m, 1H), 7.13-7.11 (m, 2H), 7.03 (t,  $J$  = 7.2 Hz, 1H), 4.73 (s, 1H), 4.03 (s, 2H), 3.68 (s, 3H), 3.49 (s, 6H), 2.72 (t,  $J$  = 7.2 Hz, 2H), 2.54 (q,  $J$  = 7.6 Hz, 2H);  $^{13}\text{C}$  NMR (100 MHz,  $\text{CDCl}_3$ )  $\delta$  186.7, 168.5, 143.9, 142.0, 141.2, 140.9, 139.8, 137.8, 131.5, 128.9, 128.6, 128.5, 128.3, 127.6, 127.3, 127.0, 126.2, 124.6, 71.6, 52.0, 42.5, 34.9, 30.8, 29.8; FT-IR (neat) 1771, 1737, 1373, 1234, 1043  $\text{cm}^{-1}$ ; HRMS (ESI-TOF)  $m/z$   $[\text{M}+\text{H}]^+$  calcd for  $\text{C}_{29}\text{H}_{31}\text{O}_4\text{S}$ : 475.1938; Found 475.1920.

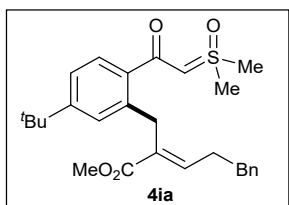

**Methyl (E)-2-(5-(tert-butyl)-2-(2-(dimethyloxylidene)acetyl)benzyl)-5-phenylpent-2-enoate 4ia.** Analytical TLC on silica gel, 3:1 EtOAc : n-hexane  $R_f$  = 0.32; light yellow liquid; yield 65% (29 mg);  $^1\text{H}$  NMR (500 MHz,  $\text{CDCl}_3$ )  $\delta$  7.37 (d,  $J$  = 8.0 Hz, 1H), 7.24 (s, 2H), 7.17 (t,  $J$  = 7.0 Hz, 2H), 7.13 (d,  $J$  = 9.0 Hz, 3H), 6.98 (t,  $J$  =

7.5 Hz, 1H), 4.69 (s, 1H), 3.98 (s, 2H), 3.68 (s, 3H), 3.45 (s, 6H), 2.69 (t,  $J = 7.5$  Hz, 2H), 2.50 (q,  $J = 7.5$  Hz, 2H), 1.25 (s, 9H);  $^{13}\text{C}$  NMR (125 MHz,  $\text{CDCl}_3$ )  $\delta$  187.1, 168.7, 152.3, 143.3, 141.3, 138.0, 136.9, 131.9, 128.6, 128.5, 127.6, 126.2, 125.5, 122.6, 71.3, 51.9, 42.4, 35.0, 34.8, 31.3, 30.8, 29.9; FT-IR (neat) 1770, 1735, 1372, 1236, 1043  $\text{cm}^{-1}$ ; HRMS (ESI-TOF)  $m/z$   $[\text{M}+\text{H}]^+$  calcd for  $\text{C}_{27}\text{H}_{35}\text{O}_4\text{S}$ : 455.2251; Found 455.2255.

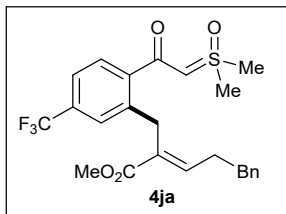

**Methyl (E)-2-(2-(2-(dimethyl(oxo)-16-sulfaneylidene)acetyl)-5-(trifluoromethyl)benzyl)-5-phenylpent-2-enoate 4ja.** Analytical TLC on silica gel, 3:1 EtOAc : n-hexane  $R_f = 0.30$ ; yellow liquid; yield 80% (38 mg);  $^1\text{H}$  NMR (600 MHz,  $\text{CDCl}_3$ )  $\delta$  7.49 (d,  $J = 7.8$  Hz, 1H), 7.42 (d,  $J = 7.8$  Hz, 1H), 7.27 (s, 1H), 7.25 (s, 2H), 7.18 (t,  $J = 7.2$  Hz, 1H), 7.14 (d,  $J = 7.8$  Hz, 2H), 7.05 (t,  $J = 7.8$  Hz, 1H), 4.69 (s, 1H), 3.94 (s, 2H), 3.68 (s, 3H), 3.49 (s, 6H), 2.73 (t,  $J = 7.8$  Hz, 2H), 2.51 (q,  $J = 7.8$  Hz, 2H);  $^{13}\text{C}$  NMR (100 MHz,  $\text{CDCl}_3$ )  $\delta$  185.3, 168.1, 144.6, 144.4, 141.0, 138.1, 131.2 ( $J_{\text{C-F}} = 31.9$  Hz), 130.6 ( $J_{\text{C-F}} = 279.1$  Hz), 128.6, 128.5, 126.3, 125.5, 124.9 ( $J_{\text{C-F}} = 3.5$  Hz), 122.9 ( $J_{\text{C-F}} = 3.9$  Hz), 72.3, 52.1, 42.4, 34.8, 30.9, 29.5;  $^{19}\text{F}$  NMR (470 MHz,  $\text{CDCl}_3$ )  $\delta$  -62.7; FT-IR (neat) 1765, 1737, 1373, 1234, 1043  $\text{cm}^{-1}$ ; HRMS (ESI-TOF)  $m/z$   $[\text{M}+\text{H}]^+$  calcd for  $\text{C}_{24}\text{H}_{26}\text{F}_3\text{O}_4\text{S}$ : 467.1498; Found 467.1477.

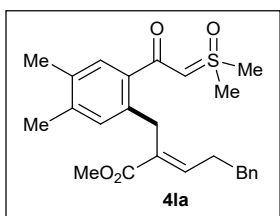

**Methyl (E)-2-(2-(2-(dimethyl(oxo)-16-sulfaneylidene)acetyl)-4,5-dimethylbenzyl)-5-phenylpent-2-enoate 4la.** Analytical TLC on silica gel, 3:1 EtOAc : n-hexane  $R_f = 0.31$ ; colorless liquid; yield 77% (34 mg);  $^1\text{H}$  NMR (400 MHz,  $\text{CDCl}_3$ )  $\delta$  7.28 (s, 1H), 7.24 (s, 1H), 7.20 (s, 1H), 7.18-7.16 (m, 2H), 7.14 (d,  $J = 7.2$  Hz, 2H), 6.98 (t,  $J = 7.2$  Hz, 1H), 6.75 (s, 1H), 3.91 (s, 2H), 3.68 (s, 3H), 3.46 (s, 6H), 2.71 (t,  $J = 7.2$  Hz, 2H), 2.51 (q,  $J = 7.6$  Hz, 2H), 2.20 (s, 3H), 2.17 (s, 3H);  $^{13}\text{C}$  NMR (100 MHz,  $\text{CDCl}_3$ )  $\delta$  187.1, 168.6, 143.5, 141.3, 138.3, 137.7, 134.4, 133.8, 131.8, 129.4, 129.1, 128.5, 128.4, 126.2, 71.4, 51.9, 42.4, 34.9, 30.7, 29.1, 19.8, 19.3; FT-IR (neat) 1763, 1737, 1374, 1234, 1043  $\text{cm}^{-1}$ ; HRMS (ESI-TOF)  $m/z$   $[\text{M}+\text{H}]^+$  calcd for  $\text{C}_{25}\text{H}_{31}\text{O}_4\text{S}$ : 427.1938; Found 427.1933.

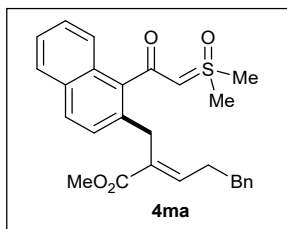

**Methyl (E)-2-((1-(2-(dimethyl(oxo)-16-sulfaneylidene)acetyl)**

**naphthalen-2-yl)methyl)-5-phenylpent-2-enoate 4ma.** Analytical TLC on silica gel, 3:1 EtOAc : n-hexane  $R_f$  = 0.30; yellow liquid; yield 81% (37 mg);  $^1\text{H}$  NMR (400 MHz,  $\text{CDCl}_3$ )  $\delta$  8.01 (d,  $J$  = 8.4 Hz, 1H), 7.76 (d,  $J$  = 8.4 Hz, 1H), 7.65 (d,  $J$  = 8.4 Hz, 1H), 7.47-7.38 (m, 2H), 7.25-7.21 (m, 2H), 7.18-7.15 (m, 1H), 7.11 (d,  $J$  = 6.8 Hz, 2H), 7.08 (d,  $J$  = 7.2 Hz, 1H), 7.04 (d,  $J$  = 8.4 Hz, 1H), 4.78 (s, 1H), 3.93 (s, 2H), 3.67 (s, 3H), 3.59 (s, 6H), 2.73 (t,  $J$  = 7.2 Hz, 2H), 2.56 (q,  $J$  = 7.6 Hz, 2H);  $^{13}\text{C}$  NMR (100 MHz,  $\text{CDCl}_3$ )  $\delta$  186.5, 168.4, 144.5, 141.1, 138.8, 132.3, 132.1, 131.2, 130.4, 128.6, 128.2, 127.9, 126.3, 126.2, 125.5, 125.3, 74.4, 52.0, 42.4, 34.8, 30.8, 29.7; FT-IR (neat) 1766, 1737, 1375, 1234, 1040  $\text{cm}^{-1}$ ; HRMS (ESI-TOF)  $m/z$   $[\text{M}+\text{H}]^+$  calcd for  $\text{C}_{27}\text{H}_{29}\text{O}_4\text{S}$ : 449.1781; Found 449.1776.

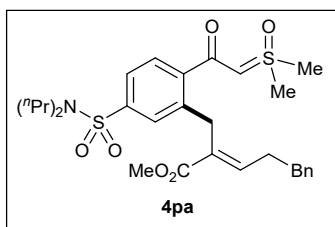

**Methyl (E)-2-((2-(2-(dimethyl(oxo)-16-sulfaneylidene) acetyl)-5-**

**(N, N-dipropylsulfamoyl)benzyl)-5-phenylpent-2-enoate 4pa.** Analytical TLC on silica gel, 3:1 EtOAc : n-hexane  $R_f$  = 0.28; yellow liquid; yield 69% (39 mg);  $^1\text{H}$  NMR (400 MHz,  $\text{CDCl}_3$ )  $\delta$  7.61-7.59 (m, 1H), 7.50-7.48 (m, 2H), 7.29-7.27 (m, 1H), 7.25 (s, 1H), 7.20 (d,  $J$  = 7.2 Hz, 1H), 7.16 (d,  $J$  = 7.2 Hz, 2H), 7.05 (t,  $J$  = 7.6 Hz, 1H), 4.71 (s, 1H), 3.94 (s, 2H), 3.66 (s, 3H), 3.48 (s, 6H), 2.98 (t,  $J$  = 7.6 Hz, 4H), 2.74 (t,  $J$  = 7.2 Hz, 2H), 2.50 (q,  $J$  = 7.2 Hz, 2H), 1.49 (q,  $J$  = 7.6 Hz, 4H), 0.83 (t,  $J$  = 7.6 Hz, 6H);  $^{13}\text{C}$  NMR (100 MHz,  $\text{CDCl}_3$ )  $\delta$  185.1, 167.9, 144.7, 144.6, 140.9, 140.3, 138.5, 130.5, 128.7, 128.5, 128.0, 126.6, 126.3, 124.7, 72.6, 52.0, 50.2, 42.3, 34.8, 30.9, 29.7, 22.1, 11.3; FT-IR (neat) 1768, 1733, 1372, 1231, 1045, 809  $\text{cm}^{-1}$ ; HRMS (ESI-TOF)  $m/z$   $[\text{M}+\text{H}]^+$  calcd for  $\text{C}_{29}\text{H}_{40}\text{NO}_6\text{S}_2$ : 562.2292; Found 562.2273.

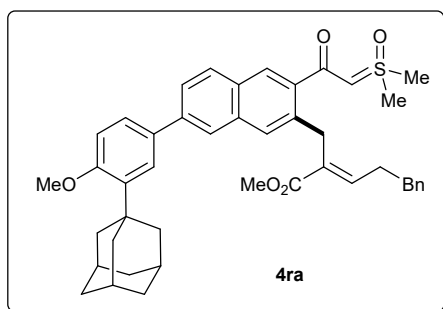

**Methyl (E)-2-((7-(3-((3*r*,5*r*,7*r*)-adamantan-1-yl)-4-methoxyphenyl)-3-(2-(dimethyl(oxo)-16-sulfaneylidene)acetyl)naphthalen-2-yl)methyl) - 5-phenylpent-2-enoate 4ra.** Analytical TLC on silica gel, 3:1 EtOAc : n-hexane  $R_f$  = 0.32; colorless liquid; yield 75% (52 mg);  $^1\text{H}$  NMR (400 MHz,  $\text{CDCl}_3$ )  $\delta$  8.00 (d,  $J$  = 9.2 Hz, 1H), 7.96-7.95 (m, 1H), 7.77 (d,  $J$  = 8.8 Hz, 1H), 7.72-7.69 (m, 1H), 7.59-7.58 (m, 1H), 7.54-7.51 (m, 2H), 7.16 (t,  $J$  = 6.8 Hz, 2H), 7.12-7.09 (m, 1H), 7.00 (d,  $J$  = 8.4 Hz, 1H), 6.85 (d,  $J$  = 6.8 Hz, 2H), 6.79 (t,  $J$  = 7.6 Hz, 1H), 4.65 (s, 1H), 4.46 (s, 2H), 3.90 (s, 3H), 3.71 (s, 3H), 3.48 (s, 6H), 2.36 (t,  $J$  = 7.2 Hz, 2H), 2.21-2.16 (m, 8H), 2.10 (s, 3H), 1.80 (s, 6H);  $^{13}\text{C}$  NMR (100 MHz,  $\text{CDCl}_3$ )  $\delta$  187.4, 169.0, 158.8, 142.8, 141.3, 139.1, 139.0, 138.9, 134.4, 133.6, 132.8, 131.9, 131.4, 128.4, 128.3, 127.1, 126.1, 126.0, 125.9, 125.8, 125.7, 125.63, 125.61, 112.2, 72.1, 55.3, 52.1, 42.4, 40.8, 37.34, 37.29, 34.6, 30.0, 29.3, 28.3; FT-IR (neat) 1777, 1735, 1373, 1234, 1042  $\text{cm}^{-1}$ ; HRMS (ESI-TOF)  $m/z$   $[\text{M}+\text{H}]^+$  calcd for  $\text{C}_{44}\text{H}_{49}\text{O}_5\text{S}$ : 689.3295; Found 689.3282.

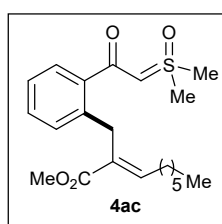

**Methyl (E)-2-(2-(2-(dimethyl(oxo)-16-sulfaneylidene)acetyl)benzyl)non - 2-enoate 4ac.** Analytical TLC on silica gel, 3:1 EtOAc : n-hexane  $R_f$  = 0.40; colorless liquid; yield 85% (33 mg);  $^1\text{H}$  NMR (600 MHz,  $\text{CDCl}_3$ )  $\delta$  7.41 (d,  $J$  = 7.2 Hz, 1H), 7.22 (t,  $J$  = 7.2 Hz, 1H), 7.15 (t,  $J$  = 7.2 Hz, 1H), 7.03 (d,  $J$  = 7.8 Hz, 1H), 6.99 (t,  $J$  = 7.6 Hz, 1H), 4.72 (s, 1H), 3.95 (s, 2H), 3.66 (s, 3H), 3.53 (s, 6H), 2.19 (q,  $J$  = 7.8 Hz, 2H), 1.43-1.38 (m, 2H), 1.30-1.22 (m, 6H), 0.86 (t,  $J$  = 6.6 Hz, 3H);  $^{13}\text{C}$  NMR (125 MHz,  $\text{CDCl}_3$ )  $\delta$  187.2, 168.6, 145.4, 141.1, 137.2, 130.7, 129.2, 127.9, 127.5, 125.7, 71.5, 51.9, 42.5, 31.8, 29.6, 29.2, 29.0, 28.8, 22.7, 14.2; FT-IR (neat) 1768, 1737, 1372, 1232, 1043  $\text{cm}^{-1}$ ; HRMS (ESI-TOF)  $m/z$   $[\text{M}+\text{H}]^+$  calcd for  $\text{C}_{21}\text{H}_{31}\text{O}_4\text{S}$ : 379.1938; Found 379.1936.

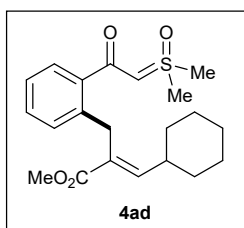

**Methyl (E)-3-cyclohexyl-2-(2-(2-(dimethyl(oxo)-16-sulfaneylidene)**

**acetyl)benzyl)acrylate 4ad.** Analytical TLC on silica gel, 3:1 EtOAc : n-hexane  $R_f$  = 0.37; yellow liquid; yield 74% (28 mg);  $^1\text{H}$  NMR (400 MHz,  $\text{CDCl}_3$ )  $\delta$  7.41 (d,  $J$  = 7.6 Hz, 1H), 7.24-7.20 (m, 1H), 7.14 (t,  $J$  = 7.2 Hz, 1H), 7.03 (d,  $J$  = 7.6 Hz, 1H), 6.82 (d,  $J$  = 10.0 Hz, 1H), 4.74 (s, 1H), 3.94 (s, 2H), 3.64 (s, 3H), 3.53 (s, 6H), 2.39-2.32 (m, 1H), 1.72-1.67 (m, 2H), 1.62 (t,  $J$  = 9.6 Hz, 3H), 1.20 (t,  $J$  = 6.4 Hz, 4H), 1.15-1.12 (m, 1H);  $^{13}\text{C}$  NMR (100 MHz,  $\text{CDCl}_3$ )  $\delta$  187.1, 168.7, 150.0, 141.0, 137.4, 129.2, 128.7, 127.7, 127.5, 125.7, 71.7, 51.9, 42.5, 37.8, 32.2, 29.8, 25.9, 25.5; FT-IR (neat) 1776, 1738, 1370, 1234, 1043  $\text{cm}^{-1}$ ; HRMS (ESI-TOF)  $m/z$   $[\text{M}+\text{H}]^+$  calcd for  $\text{C}_{21}\text{H}_{29}\text{O}_4\text{S}$ : 377.1781; Found 377.1780.

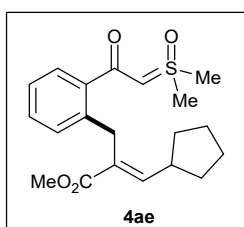

**Methyl (E)-3-cyclopentyl-2-(2-(2-(dimethyl(oxo)-16-sulfaneylidene)**

**acetyl)benzyl)acrylate 4ae.** Analytical TLC on silica gel, 3:1 EtOAc : n-hexane  $R_f$  = 0.35; yellow liquid; yield 78% (29 mg);  $^1\text{H}$  NMR (500 MHz,  $\text{CDCl}_3$ )  $\delta$  7.40 (d,  $J$  = 7.5 Hz, 1H), 7.21 (t,  $J$  = 7.0 Hz, 1H), 7.14 (t,  $J$  = 7.0 Hz, 1H), 7.04 (d,  $J$  = 7.5 Hz, 1H), 6.91 (d,  $J$  = 10.0 Hz, 1H), 4.73 (s, 1H), 3.96 (s, 2H), 3.64 (s, 3H), 3.52 (s, 6H), 2.76-2.70 (m, 1H), 1.88 (s, 1H), 1.77-1.74 (m, 3H), 1.70-1.67 (m, 1H), 1.56-1.52 (m, 1H), 1.37-1.30 (m, 2H);  $^{13}\text{C}$  NMR (125 MHz,  $\text{CDCl}_3$ )  $\delta$  187.1, 168.6, 150.2, 141.0, 137.4, 129.1, 128.8, 127.7, 127.4, 125.7, 71.7, 51.8, 42.4, 39.6, 33.3, 29.6, 25.7; FT-IR (neat) 1778, 1737, 1372, 1233, 1043  $\text{cm}^{-1}$ ; HRMS (ESI-TOF)  $m/z$   $[\text{M}+\text{H}]^+$  calcd for  $\text{C}_{20}\text{H}_{27}\text{O}_4\text{S}$ : 363.1625; Found 363.1624.

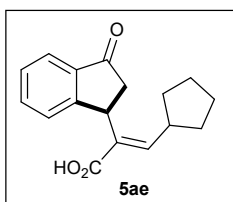

**(E)-3-cyclopentyl-2-(3-oxo-2,3-dihydro-1H-inden-1-yl)acrylic acid 5ae.**

Analytical TLC on silica gel, 1:1 EtOAc: n-Hexane  $R_f$  = 0.43; colorless solid; mp 167-168  $^{\circ}\text{C}$ ; yield 71% (20 mg);  $^1\text{H}$  NMR (600 MHz,  $\text{CDCl}_3$ )  $\delta$  7.75 (d,  $J$  = 7.2 Hz, 1H), 7.54 (t,  $J$  = 7.2 Hz, 1H), 7.36 (t,  $J$  = 7.2 Hz, 1H), 7.25 (s, 1H), 7.03 (d,  $J$  = 10.2 Hz, 1H), 4.57-4.55 (m, 1H), 2.91 (dd,  $J$  = 19.2, 7.8 Hz, 1H), 2.82-2.74 (m, 2H), 1.96-1.90 (m, 1H), 1.77-1.72 (m, 3H), 1.64-1.58

(m, 3H), 1.50-1.47 (m, 1H), 1.39-1.35 (m, 1H);  $^{13}\text{C}$  NMR (125 MHz,  $\text{CDCl}_3$ )  $\delta$  206.1, 171.1, 157.0, 153.4, 136.9, 134.8, 129.7, 127.7, 125.0, 123.8, 43.2, 39.5, 36.8, 33.9, 33.5, 25.8; FT-IR (neat) 2982, 1720, 1363, 1235, 1043  $\text{cm}^{-1}$ ; H RMS (ESI-TOF)  $m/z$   $[\text{M}+\text{H}]^+$  calcd for  $\text{C}_{17}\text{H}_{19}\text{O}_3$ : 271.1329; Found 271.1328.

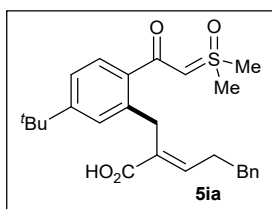

**(E)-2-(5-(*tert*-butyl)-2-(2-(dimethyl(oxo)-16-sulfaneylidene)acetyl)**

**benzyl)-5-phenylpent-2-enoic acid 5ia.** Analytical TLC on silica gel, 4:1:0.1 EtOAc: n-Hexane: AcOH  $R_f$  = 0.32; light yellow solid; mp >200 °C; yield 65% (28 mg);  $^1\text{H}$  NMR (400 MHz,  $\text{DMSO}-d_6$ )  $\delta$  12.38 (s, 1H), 7.25 (t,  $J$  = 7.6 Hz, 3H), 7.18-7.17 (m, 1H), 7.14 (t,  $J$  = 6.4 Hz, 3H), 7.03-7.02 (m, 1H), 6.85 (t,  $J$  = 7.2 Hz, 1H), 5.05 (s, 1H), 3.82 (s, 2H), 3.52 (s, 6H), 2.63 (t,  $J$  = 7.6 Hz, 2H), 2.42 (q,  $J$  = 7.6 Hz, 2H), 1.20 (s, 9H);  $^{13}\text{C}$  NMR (100 MHz,  $\text{DMSO}-d_6$ )  $\delta$  185.1, 168.7, 150.8, 142.4, 141.0, 138.6, 136.5, 131.9, 128.3, 128.2, 126.9, 125.9, 124.4, 122.1, 75.3, 40.4, 34.3, 34.0, 31.0, 30.0, 28.9; FT-IR (neat) 2984, 1735, 1372, 1236, 1043  $\text{cm}^{-1}$ ; HRMS (ESI-TOF)  $m/z$   $[\text{M}+\text{H}]^+$  calcd for  $\text{C}_{26}\text{H}_{33}\text{O}_4\text{S}$ : 441.2094; Found 441.2095.

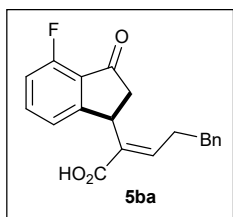

**(E)-2-(4-fluoro-3-oxo-2,3-dihydro-1H-inden-1-yl)-5-phenylpent-2-**

**enoic acid 5ba.** Analytical TLC on silica gel, 1:1 EtOAc: n-Hexane  $R_f$  = 0.42; colorless solid; mp 170-171 °C; yield 81% (27 mg);  $^1\text{H}$  NMR (500 MHz,  $\text{CDCl}_3$ )  $\delta$  7.43-7.38 (m, 1H), 7.30 (t,  $J$  = 7.5 Hz, 2H), 7.23 (t,  $J$  = 7.5 Hz, 1H), 7.15-7.12 (m, 3H), 6.94 (t,  $J$  = 8.5 Hz, 1H), 6.61 (d,  $J$  = 7.5 Hz, 1H), 4.34-4.31 (m, 1H), 2.87-2.80 (m, 2H), 2.66-2.55 (m, 4H);  $^{13}\text{C}$  NMR (125 MHz,  $\text{CDCl}_3$ )  $\delta$  202.0, 170.6, 159.9 ( $J_{\text{C-F}}$  = 262.1 Hz), 158.7, 147.1, 140.4, 136.6 ( $J_{\text{C-F}}$  = 8.3 Hz), 131.6, 128.8, 128.6, 126.7, 124.7 ( $J_{\text{C-F}}$  = 12.9 Hz), 120.7 ( $J_{\text{C-F}}$  = 3.8 Hz), 114.8 ( $J_{\text{C-F}}$  = 19.3 Hz), 43.0, 36.5, 34.9, 31.0;  $^{19}\text{F}$  NMR (470 MHz,  $\text{CDCl}_3$ )  $\delta$  -115.0; FT-IR (neat) 2983, 1736, 1372, 1245, 1030  $\text{cm}^{-1}$ ; HRMS (ESI-TOF)  $m/z$   $[\text{M}+\text{H}]^+$  calcd for  $\text{C}_{20}\text{H}_{18}\text{FO}_3$ : 325.1234; Found 325.1217.

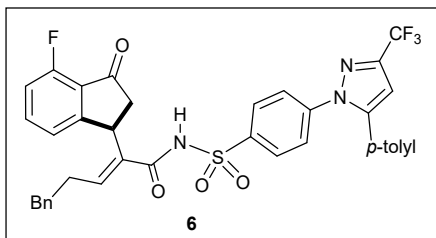

**(E)-2-(4-fluoro-3-oxo-2,3-dihydro-1H-inden-1-yl)-5-**

**phenyl-N-((4-(5-(p-tolyl)-3-(trifluoromethyl)-1H-pyrazol-1-yl)phenyl)sulfonyl)pent-2-**

**enamide 6.** Analytical TLC on silica gel, 4:1 EtOAc : n-hexane  $R_f$  = 0.30; colorless solid; mp 197-198 °C; yield 71% (48 mg);  $^1\text{H}$  NMR (400 MHz, DMSO- $d_6$ )  $\delta$  7.68 (d,  $J$  = 8.4 Hz, 2H), 7.49-7.44 (m, 1H), 7.40 (d,  $J$  = 8.8 Hz, 2H), 7.30-7.27 (m, 2H), 7.25-7.23 (m, 2H), 7.22-7.18 (m, 4H), 7.16-7.14 (m, 2H), 6.98 (t,  $J$  = 9.2 Hz, 1H), 6.76-6.72 (m, 2H), 4.42-4.39 (m, 1H), 2.82-2.73 (m, 2H), 2.67-2.54 (m, 3H), 2.35-2.29 (m, 4H);  $^{13}\text{C}$  NMR (100 MHz, DMSO- $d_6$ )  $\delta$  201.5, 168.1 ( $J_{\text{C-F}}$  = 7.3 Hz), 159.9, 158.9 ( $J_{\text{C-F}}$  = 258.4 Hz), 145.2, 142.7, 142.4, 142.0, 141.6 ( $J_{\text{C-F}}$  = 29.0 Hz), 141.1, 140.6 ( $J_{\text{C-F}}$  = 7.2 Hz), 139.1, 136.7 ( $J_{\text{C-F}}$  = 8.1 Hz), 135.7 ( $J_{\text{C-F}}$  = 3.0 Hz), 129.4 ( $J_{\text{C-F}}$  = 74.6 Hz), 128.5, 128.3, 128.2 ( $J_{\text{C-F}}$  = 4.7 Hz), 128.1, 126.0, 125.4, 125.3, 123.9 ( $J_{\text{C-F}}$  = 12.9 Hz), 122.7, 120.9 ( $J_{\text{C-F}}$  = 3.3 Hz), 120.0, 113.8 ( $J_{\text{C-F}}$  = 19.1 Hz), 106.0, 43.0, 36.6, 34.3, 30.0, 20.8;  $^{19}\text{F}$  NMR (376 MHz,  $\text{CDCl}_3$ )  $\delta$  -117.4, -60.9; FT-IR (neat) 2995, 1737, 1372, 1323, 1234, 1043  $\text{cm}^{-1}$ ; HRMS (ESI-TOF)  $m/z$   $[\text{M}+\text{H}]^+$  calcd for  $\text{C}_{37}\text{H}_{30}\text{F}_4\text{N}_3\text{O}_4\text{S}$ : 688.1888; Found 688.1858.

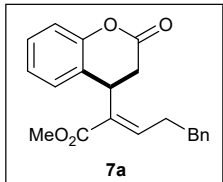

**Methyl (E)-2-(2-oxochroman-4-yl)-5-phenylpent-2-enoate 7a.** Analytical

TLC on silica gel, 1:9 EtOAc : n-hexane  $R_f$  = 0.52; colorless liquid; yield 75% (25 mg);  $^1\text{H}$  NMR (400 MHz,  $\text{CDCl}_3$ )  $\delta$  7.27 (s, 1H), 7.25-7.23 (m, 2H), 7.19 (d,  $J$  = 6.8 Hz, 2H), 7.16-7.13 (m, 2H), 7.09-7.07 (m, 1H), 7.05-7.04 (m, 1H), 7.03-7.00 (m, 1H), 4.21 (t,  $J$  = 6.8 Hz, 1H), 3.60 (s, 3H), 2.84-2.79 (m, 2H), 2.69-2.63 (m, 2H), 2.49 (dd,  $J$  = 15.6, 7.6 Hz, 1H), 2.33 (dd,  $J$  = 15.6, 6.4 Hz, 1H);  $^{13}\text{C}$  NMR (100 MHz,  $\text{CDCl}_3$ )  $\delta$  171.0, 164.0, 150.5, 146.1, 140.5, 129.0, 128.7, 128.6, 128.1, 127.8, 126.6, 124.7, 124.5, 117.4, 51.9, 41.6, 34.6, 34.5, 30.7; FT-IR (neat) 1763, 1727, 1556, 1454, 1174, 1023  $\text{cm}^{-1}$ ; HRMS (ESI-TOF)  $m/z$   $[\text{M}+\text{H}]^+$  calcd for  $\text{C}_{21}\text{H}_{21}\text{O}_4$ : 337.1434; Found 337.1415.

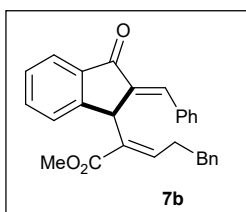

**Methyl (*E*)-2-(2-((*E*)-benzylidene)-3-oxo-2,3-dihydro-1H-inden-1-yl)-5-phenylpent-2-enoate 7b.**

Analytical TLC on silica gel, 3:7 EtOAc : n-hexane  $R_f = 0.40$ ; colorless liquid; yield 70% (29 mg);  $^1\text{H}$  NMR (400 MHz,  $\text{CDCl}_3$ )  $\delta$  7.92 (d,  $J = 7.6$  Hz, 1H), 7.76-7.75 (m, 1H), 7.60-7.56 (m, 1H), 7.55-7.53 (m, 2H), 7.45 (d,  $J = 7.6$  Hz, 1H), 7.41-7.36 (m, 4H), 7.20-7.13 (m, 3H), 6.97 (d,  $J = 8.0$  Hz, 2H), 6.03 (t,  $J = 7.2$  Hz, 1H), 5.31-5.30 (m, 1H), 3.71 (s, 3H), 2.68-2.60 (m, 1H), 2.57-2.49 (m, 1H), 2.42-2.38 (m, 2H);  $^{13}\text{C}$  NMR (125 MHz,  $\text{CDCl}_3$ )  $\delta$  194.3, 167.6, 153.7, 143.9, 141.1, 138.0, 136.6, 135.1, 135.0, 134.5, 133.7, 131.3, 131.2, 129.8, 129.0, 128.8, 128.7, 128.6, 128.5, 128.4, 128.1, 126.1, 125.3, 124.4, 51.8, 46.3, 35.1, 31.5; FT-IR (neat) 1738, 1718, 1552, 1370, 1245, 1054  $\text{cm}^{-1}$ ; HRMS (ESI-TOF)  $m/z$   $[\text{M}+\text{H}]^+$  calcd for  $\text{C}_{28}\text{H}_{25}\text{O}_3$ : 409.1798; Found 409.1798.

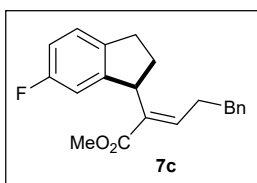

**Methyl (*E*)-2-(6-fluoro-2,3-dihydro-1H-inden-1-yl)-5-phenylpent-2-enoate 7c.**

Analytical TLC on silica gel, 1:9 EtOAc : n-hexane  $R_f = 0.45$ ; colorless liquid; yield 64% (21 mg);  $^1\text{H}$  NMR (400 MHz,  $\text{CDCl}_3$ )  $\delta$  7.29-7.27 (m, 1H), 7.26 (s, 1H), 7.22-7.18 (m, 1H), 7.13-7.09 (m, 3H), 6.96 (t,  $J = 8.0$  Hz, 1H), 6.83-6.78 (m, 1H), 6.50 (d,  $J = 8.8$  Hz, 1H), 4.34 (t,  $J = 9.2$  Hz, 1H), 3.63 (s, 3H), 3.01-2.95 (m, 1H), 2.88-2.80 (m, 1H), 2.76-2.72 (m, 2H), 2.48-2.42 (m, 2H), 2.29-2.21 (m, 1H), 2.13-2.03 (m, 1H);  $^{13}\text{C}$  NMR (100 MHz,  $\text{CDCl}_3$ )  $\delta$  167.7, 163.5 ( $J_{\text{C-F}} = 241.0$  Hz), 148.0 ( $J_{\text{C-F}} = 7.5$  Hz), 143.8, 141.0, 138.9 ( $J_{\text{C-F}} = 2.3$  Hz), 134.2, 128.6, 128.5, 126.4, 125.3 ( $J_{\text{C-F}} = 8.6$  Hz), 113.3 ( $J_{\text{C-F}} = 22.3$  Hz), 110.3 ( $J_{\text{C-F}} = 22.1$  Hz), 51.7, 44.0, 35.1, 32.4, 31.3, 30.8;  $^{19}\text{F}$  NMR (376 MHz,  $\text{CDCl}_3$ )  $\delta$  -117.9; FT-IR (neat) 1725, 1371, 1249, 1054  $\text{cm}^{-1}$ ; HRMS (ESI-TOF)  $m/z$   $[\text{M}+\text{H}]^+$  calcd for  $\text{C}_{21}\text{H}_{22}\text{FO}_2$ : 325.1598; Found 325.1579.

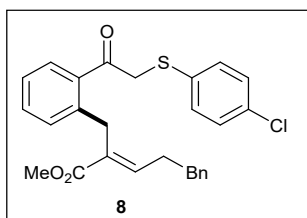

**Methyl (*E*)-2-(2-(2-((4-chlorophenyl)thio)acetyl)benzyl)-5-phenylpent-2-enoate 8.**

Analytical TLC on silica gel, 1:7 EtOAc : n-hexane  $R_f = 0.40$ ; colorless liquid; yield 78% (36 mg);  $^1\text{H}$  NMR (400 MHz,  $\text{CDCl}_3$ )  $\delta$  7.54-7.52 (m, 1H), 7.34-7.28 (m, 4H), 7.25-7.24 (m, 1H), 7.23-7.21 (m, 2H), 7.20-7.17 (m, 2H), 7.14-7.12 (m, 2H), 7.03 (t,  $J =$



7.6 Hz, 1H), 6.99 (d,  $J = 7.6$  Hz, 1H), 4.24 (s, 2H), 3.81 (s, 2H), 3.63 (s, 3H), 2.73 (t,  $J = 7.6$  Hz, 2H), 2.46 (q,  $J = 7.6$  Hz, 2H);  $^{13}\text{C}$  NMR (100 MHz,  $\text{CDCl}_3$ )  $\delta$  198.1, 168.0, 144.4, 141.0, 139.9, 136.6, 133.7, 133.1, 131.9, 131.7, 130.7, 129.3, 128.9, 128.6, 128.5, 128.4, 126.3, 125.9, 51.9, 44.1, 34.8, 30.8, 30.1; FT-IR (neat) 1764, 1737, 1375, 1234, 1040  $\text{cm}^{-1}$ ; HRMS (ESI-TOF)  $m/z$   $[\text{M}+\text{H}]^+$  calcd for  $\text{C}_{27}\text{H}_{26}\text{ClO}_3\text{S}$ : 465.1286; Found 465.1277.

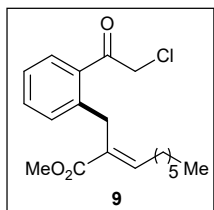

**Methyl (*E*)-2-(2-(2-chloroacetyl)benzyl)non-2-enoate 9.** Analytical TLC

on silica gel, 1:7 EtOAc : n-hexane  $R_f = 0.49$ ; colorless liquid; yield 69% (23 mg);  $^1\text{H}$  NMR (400 MHz,  $\text{CDCl}_3$ )  $\delta$  7.65-7.63 (m, 1H), 7.41-7.37 (m, 1H), 7.28-7.24 (m, 1H), 7.16 (d,  $J = 7.6$  Hz, 1H), 7.04 (t,  $J = 7.2$  Hz, 1H), 4.40 (s, 2H), 3.91 (s, 2H), 3.66 (s, 3H), 2.18 (q,  $J = 7.6$  Hz, 2H), 1.41 (q,  $J = 7.6$  Hz, 1H), 1.30-1.23 (m, 7H), 0.86 (t,  $J = 7.6$  Hz, 3H);  $^{13}\text{C}$  NMR (100 MHz,  $\text{CDCl}_3$ )  $\delta$  196.4, 168.3, 146.1, 140.6, 135.0, 132.2, 129.9, 129.0, 128.6, 126.0, 52.0, 31.8, 30.1, 29.2, 29.1, 28.7, 22.7, 14.2, 6.5; FT-IR (neat) 1769, 1737, 1373, 1234, 1041  $\text{cm}^{-1}$ ; HRMS (ESI-TOF)  $m/z$   $[\text{M}+\text{H}]^+$  calcd for  $\text{C}_{19}\text{H}_{26}\text{ClO}_3$ : 337.1565; Found 337.1547.

## Mechanistic investigation

### Scheme S1. Radical Trapping Experiments

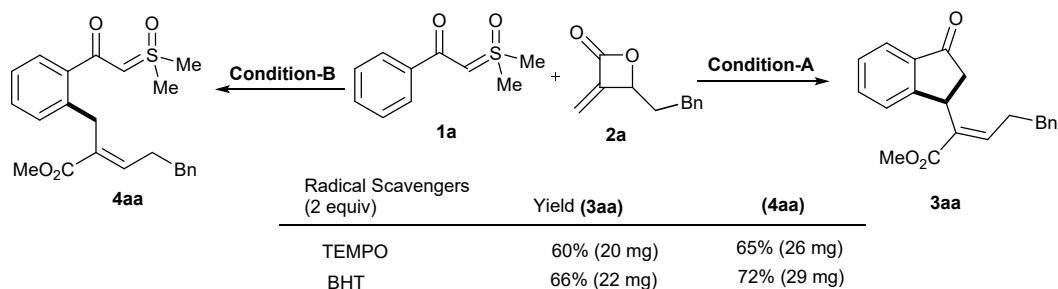

**C-H Annulation.** Substrate **1a** (0.1 mmol, 20 mg, 1 equiv), **2a** (0.15 mmol, 28 mg, 1.5 equiv),  $[\text{Cp}^*\text{Rh}(\text{CH}_3\text{CN})_3](\text{SbF}_6)_2$  (0.0025 mmol, 2.1 mg, 0.025 equiv),  $\text{Zn}(\text{OAc})_2$  (0.1 mmol, 18 mg, 1 equiv) and TEMPO or BHT (0.2 mmol, 2 equiv) were stirred in TFE (1 mL) at 80 °C for 12 h under  $\text{N}_2$  atmosphere. Evaporation of the solvent gave a residue that was extracted with EtOAc (10 mL) and washed with water (5 mL). Drying ( $\text{Na}_2\text{SO}_4$ ) and evaporation of the solvent gave a residue that was stirred with  $\text{K}_2\text{CO}_3$  (0.3 mmol, 41 mg, 3.0 equiv) and MeI (0.5 mmol, 33  $\mu\text{L}$ , 5.0 equiv) in acetone (2 mL) at room temperature for 3 h. After completion (monitored by TLC), evaporation of the solvent provided a residue that was extracted with EtOAc (2 x 10 mL) and was washed with water (10 mL). Drying ( $\text{Na}_2\text{SO}_4$ ) and evaporation of the solvent

gave a residue that was purified on silica gel column chromatography as described in the general procedure to afford **3aa**.

**C-H Allylation.** Substrate **1a** (0.1 mmol, 20 mg, 1 equiv), **2a** (0.15 mmol, 28 mg, 1.5 equiv),  $[\text{Cp}^*\text{RhCl}_2]_2$  (0.0025 mmol, 1.5 mg, 0.025 equiv),  $\text{Zn}(\text{OAc})_2$  (0.1 mmol, 18 mg, 1 equiv), PivOH (0.1 mmol, 10 mg, 1 equiv) and TEMPO or BHT (2 equiv) were stirred in TFE (1 mL) at 80 °C for 12 h under  $\text{N}_2$  atmosphere. Evaporation of the solvent gave a residue that was extracted with EtOAc (10 mL) and washed with water (5 mL). Drying ( $\text{Na}_2\text{SO}_4$ ) and evaporation of the solvent gave a residue that was stirred with  $\text{K}_2\text{CO}_3$  (0.3 mmol, 41 mg, 3.0 equiv) and MeI (0.5 mmol, 33  $\mu\text{L}$ , 5.0 equiv) in acetone (2 mL) at room temperature for 3 h. After completion (monitored by TLC), evaporation of the solvent provided a residue that was extracted with EtOAc (2 x 10 mL) and was washed with water (10 mL). Drying ( $\text{Na}_2\text{SO}_4$ ) and evaporation of the solvent gave a residue that was purified on silica gel column chromatography as described in the general procedure to afford **4aa**.

#### Scheme S2. Control Experiments

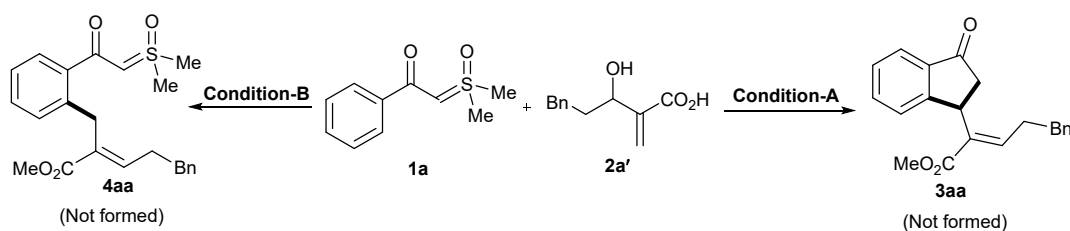

**C-H Annulation.** Substrate **1a** (0.1 mmol, 20 mg, 1 equiv), 3-hydroxy-2-methylene-5-phenylpentanoic acid **2a'** (0.15 mmol, 31 mg, 1.5 equiv),  $[\text{Cp}^*\text{Rh}(\text{CH}_3\text{CN})_3](\text{SbF}_6)_2$  (0.0025 mmol, 2.1 mg, 0.025 equiv) and  $\text{Zn}(\text{OAc})_2$  (0.1 mmol, 18 mg, 1 equiv) were stirred in TFE (1 mL) at 80 °C for 12 h under  $\text{N}_2$  atmosphere. The formation of **3aa** was not observed.

**C-H Allylation.** Substrate **1a** (0.1 mmol, 20 mg, 1 equiv), **2a'** (0.15 mmol, 31 mg, 1.5 equiv),  $[\text{Cp}^*\text{RhCl}_2]_2$  (0.0025 mmol, 1.5 mg, 0.025 equiv),  $\text{Zn}(\text{OAc})_2$  (0.1 mmol, 18 mg, 1 equiv) and PivOH (0.1 mmol, 10 mg, 1 equiv) were stirred in TFE (1 mL) at 80 °C for 12 h under  $\text{N}_2$  atmosphere. The formation of **4aa** was not observed.

### Scheme S3. Isolation of Acrylic acid derived Annulated and Allylated Products

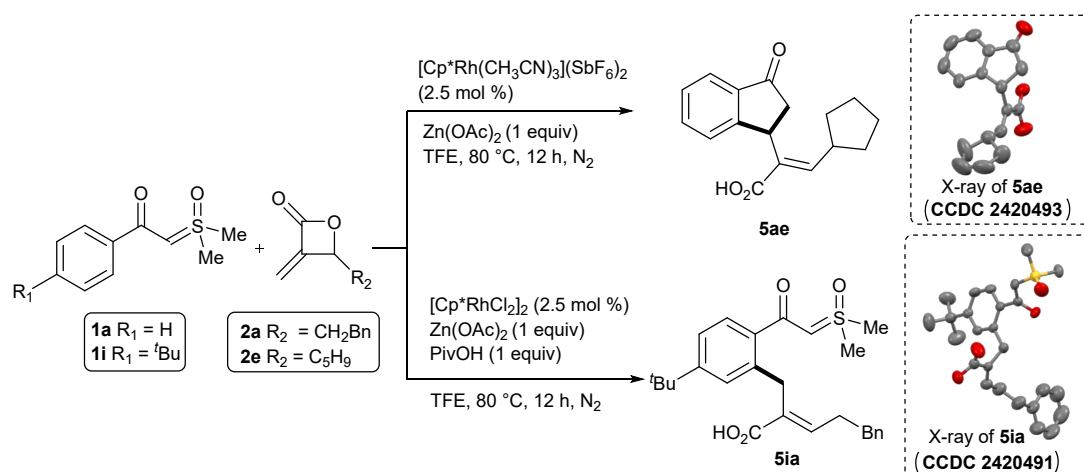

**C-H Annulation.** Substrate **1a** (0.1 mmol, 20 mg, 1 equiv), **2e** (0.15 mmol, 23 mg, 1.5 equiv),  $[\text{Cp}^*\text{Rh}(\text{CH}_3\text{CN})_3](\text{SbF}_6)_2$  (0.0025 mmol, 2.1 mg, 0.025 equiv) and  $\text{Zn}(\text{OAc})_2$  (0.1 mmol, 18 mg, 1 equiv) were stirred in TFE (1 mL) at 80 °C for 12 h under  $\text{N}_2$  atmosphere. Evaporation of the solvent gave a residue that was extracted with EtOAc (10 mL) and washed with water (5 mL). Drying ( $\text{Na}_2\text{SO}_4$ ) and evaporation of the solvent gave a residue that was purified on silica gel column chromatography (EtOAc : n-hexane = 1:1) to afford **5ae** in 71% (20 mg) yield.

**C-H Allylation.** Substrate **1i** (0.1 mmol, 25 mg, 1 equiv), **2a** (0.15 mmol, 28 mg, 1.5 equiv),  $[\text{Cp}^*\text{RhCl}_2]_2$  (0.0025 mmol, 1.5 mg, 0.025 equiv),  $\text{Zn}(\text{OAc})_2$  (0.1 mmol, 18 mg, 1 equiv) and PivOH (0.1 mmol, 10 mg, 1 equiv) were stirred in TFE (1 mL) at 80 °C for 12 h under  $\text{N}_2$  atmosphere. Evaporation of the solvent gave a residue that was extracted with EtOAc (10 mL) and washed with water (5 mL). Drying ( $\text{Na}_2\text{SO}_4$ ) and evaporation of the solvent gave a residue that was purified on silica gel column chromatography (EtOAc : n-hexane : AcOH = 4:1:0.1) to afford **5ia** in 65% (28 mg) yield.

### H/D Exchange Experiments

#### C-H Annulation

**H/D Exchange Experiment of 1a with  $\text{CD}_3\text{OD}$  in Absence of 2a.** Substrate **1a** (0.1 mmol, 20 mg, 1 equiv),  $[\text{Cp}^*\text{Rh}(\text{CH}_3\text{CN})_3](\text{SbF}_6)_2$  (0.0025 mmol, 2.1 mg, 0.025 equiv),  $\text{Zn}(\text{OAc})_2$  (0.1 mmol, 18 mg, 1 equiv) and  $\text{CD}_3\text{OD}$  (1 mmol, 0.03 mL, 1 equiv) were stirred in TFE (1 mL) at 80 °C for 15 min under  $\text{N}_2$  atmosphere. The reaction mixture was cooled to room temperature, diluted with EtOAc (10 mL) and passed through a short celite pad. Evaporation of the solvent gave a residue that was purified using silica gel column chromatography (EtOAc : MeOH = 20:1) to afford **1a-d<sub>n</sub>**. The deuterium incorporation was observed as 12% at C2-H

and 19% at the H of  $\alpha$ -carbon of carbonyl group of **1a-d<sub>n</sub>** on the basis of 400 MHz  $^1\text{H}$  NMR. (See the following  $^1\text{H}$  NMR spectrum)

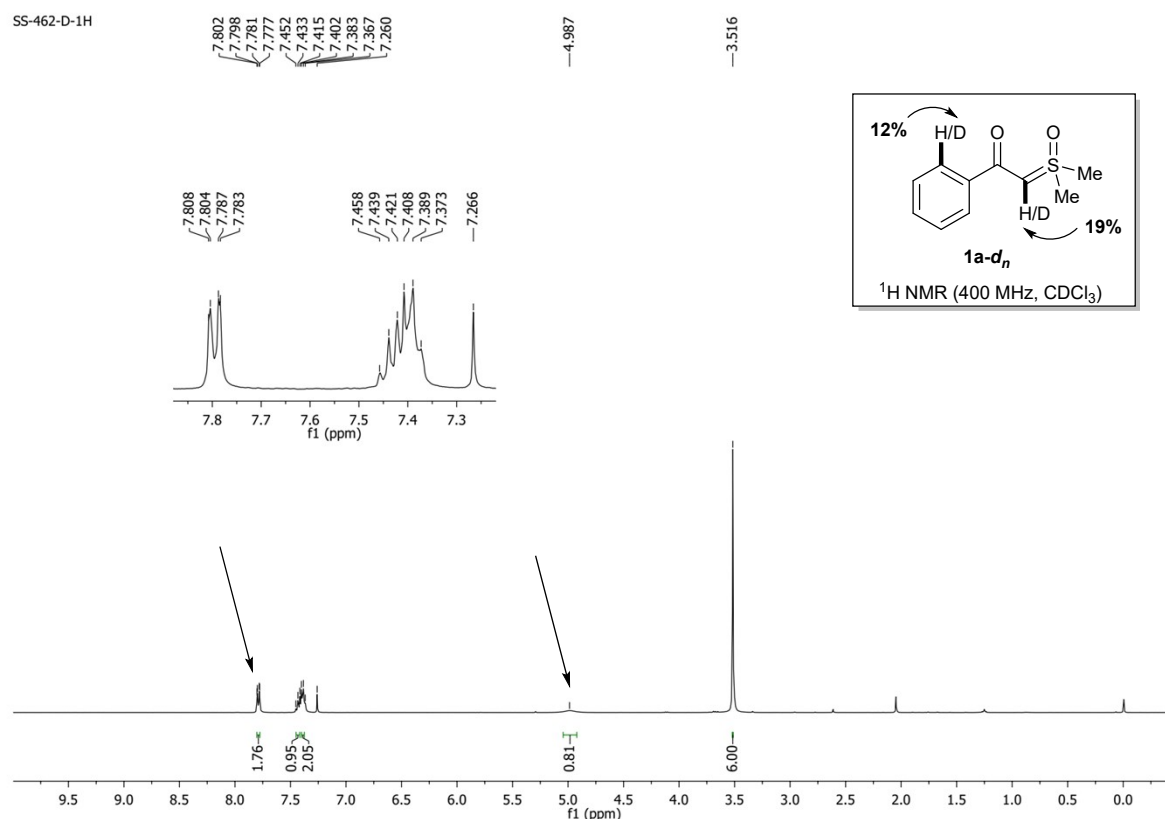

## C-H Allylation

**H/D Exchange Experiment of 1a with  $\text{CD}_3\text{OD}$  in Absence of 2a.** Substrate **1a** (0.1 mmol, 20 mg, 1 equiv),  $[\text{Cp}^*\text{RhCl}_2]_2$  (0.0025 mmol, 1.5 mg, 0.025 equiv),  $\text{Zn}(\text{OAc})_2$  (0.1 mmol, 18 mg, 1 equiv),  $\text{PivOH}$  (0.1 mmol, 10 mg, 1 equiv) and  $\text{CD}_3\text{OD}$  (1 mmol, 0.03 mL, 1 equiv) were stirred in TFE (1 mL) at 80 °C for 15 min under  $\text{N}_2$  atmosphere. The reaction mixture was cooled to room temperature, diluted with EtOAc (10 mL) and passed through a short celite pad. Evaporation of the solvent gave a residue that was purified using silica gel chromatography (EtOAc : MeOH = 20:1) to afford **1a-d<sub>n</sub>'**. The deuterium incorporation was observed as 15% at C2-H and 21% at the H of  $\alpha$ -carbon of carbonyl group of **1a-d<sub>n</sub>'** on the basis of 400 MHz  $^1\text{H}$  NMR. (See the following  $^1\text{H}$  NMR spectrum)

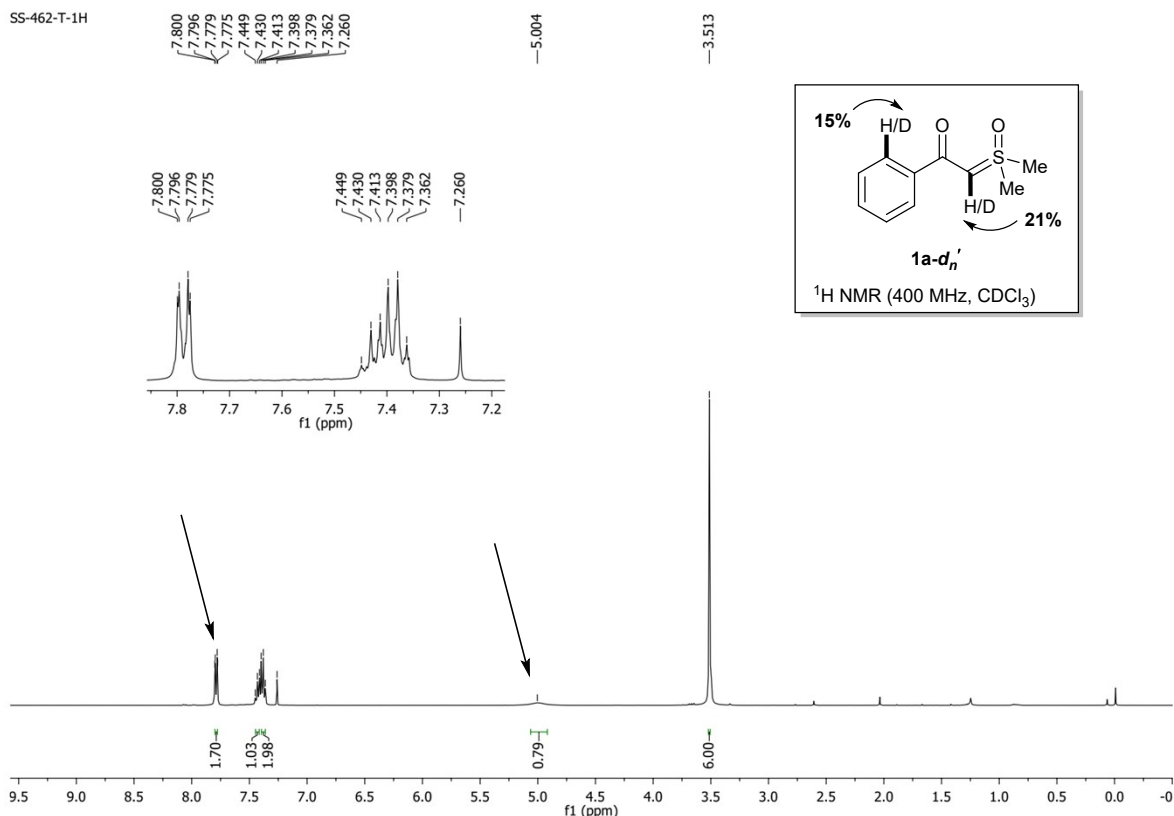

## C-H Annulation

**H/D Exchange Experiment of 1a with CD<sub>3</sub>OD in Presence of 2a.** Substrate **1a** (0.1 mmol, 20 mg, 1 equiv), **2a** (0.15 mmol, 28 mg, 1.5 equiv), [Cp\*Rh(CH<sub>3</sub>CN)<sub>3</sub>](SbF<sub>6</sub>)<sub>2</sub> (0.0025 mmol, 2.1 mg, 0.025 equiv), Zn(OAc)<sub>2</sub> (0.1 mmol, 18 mg, 1 equiv) and CD<sub>3</sub>OD (1 mmol, 0.03 mL, 1 equiv) were stirred in TFE (1 mL) at 80 °C for 12 h under N<sub>2</sub> atmosphere. After completion (monitored by TLC), the reaction mixture was cooled to room temperature. Evaporation of the solvent gave a residue that was extracted using EtOAc (10 mL) and was washed with water (5 mL). Drying (Na<sub>2</sub>SO<sub>4</sub>) and evaporation of the solvent gave a residue that was stirred with K<sub>2</sub>CO<sub>3</sub> (0.3 mmol, 41 mg, 3.0 equiv) and MeI (0.5 mmol, 33 μL, 5.0 equiv) in acetone (2 mL) at room temperature for 3 h. After completion (monitored by TLC), evaporation of the solvent gave a residue that was extracted with EtOAc (2 x 10 mL) and was washed with water (10 mL). Drying (Na<sub>2</sub>SO<sub>4</sub>) and evaporation of the solvent gave a residue that was purified on silica gel column chromatography (EtOAc : n-hexane = 1:9) to afford the annulated **3aa-d<sub>n</sub>**. The deuterium incorporation was observed as 29% at C2-H, 20% at the 'H' of α-carbon of carbonyl group, 15% at the quaternary 'H' and 6% at the 'H' of unsaturated double bond of **3aa-d<sub>n</sub>** on the basis of 400 MHz <sup>1</sup>H NMR. (See the following <sup>1</sup>H NMR spectrum)

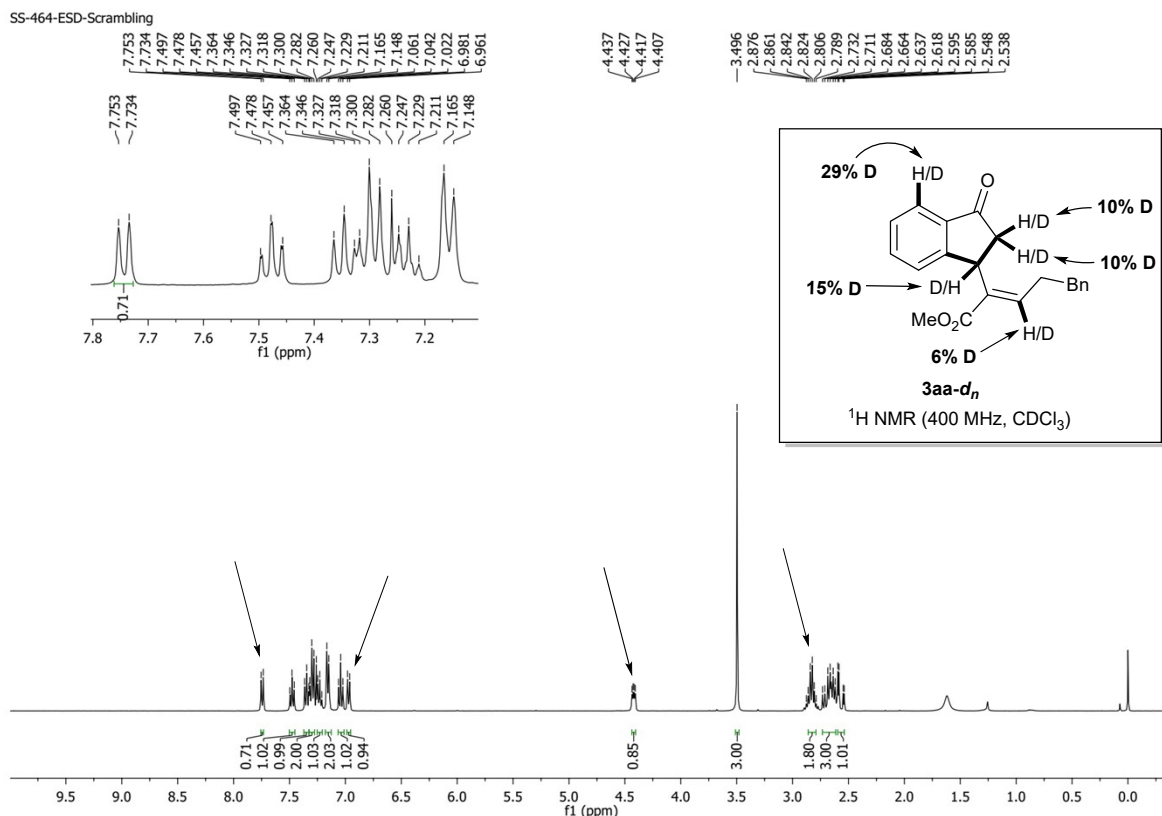

## C-H Allylation

**H/D Exchange Experiment of 1a with CD<sub>3</sub>OD in Presence of 2a.** Substrate **1a** (0.1 mmol, 20 mg, 1 equiv), **2a** (0.15 mmol, 28 mg, 1.5 equiv), [Cp\*RhCl<sub>2</sub>]<sub>2</sub> (0.0025 mmol, 1.5 mg, 0.025 equiv), Zn(OAc)<sub>2</sub> (0.1 mmol, 18 mg, 1 equiv), PivOH (0.1 mmol, 10 mg, 1 equiv) and CD<sub>3</sub>OD (1 mmol, 0.03 mL, 1 equiv) were stirred in TFE (1 mL) at 80 °C for 12 h under N<sub>2</sub> atmosphere. After completion (monitored by TLC), the reaction mixture was cooled to room temperature. Evaporation of the solvent provided a residue that was extracted with EtOAc (10 mL) and was washed with water (5 mL). Drying (Na<sub>2</sub>SO<sub>4</sub>) and evaporation of the solvent gave a residue that was stirred with K<sub>2</sub>CO<sub>3</sub> (0.3 mmol, 41 mg, 3.0 equiv) and MeI (0.5 mmol, 33 μL, 5.0 equiv) in acetone (2 mL) at room temperature for 3 h. After completion (monitored by TLC), evaporation of solvent yielded a residue that was extracted with EtOAc (2 x 10 mL) and was washed with water (10 mL). Drying (Na<sub>2</sub>SO<sub>4</sub>) and evaporation of the solvent gave a residue that was purified on silica gel column chromatography (EtOAc : n-hexane = 3:1) to afford the allylated **4aa-d<sub>n</sub>**. The deuterium incorporation was observed as 23% at C2-H of **4aa-d<sub>n</sub>** on the basis 400 MHz <sup>1</sup>H NMR. (See the following <sup>1</sup>H NMR spectrum)

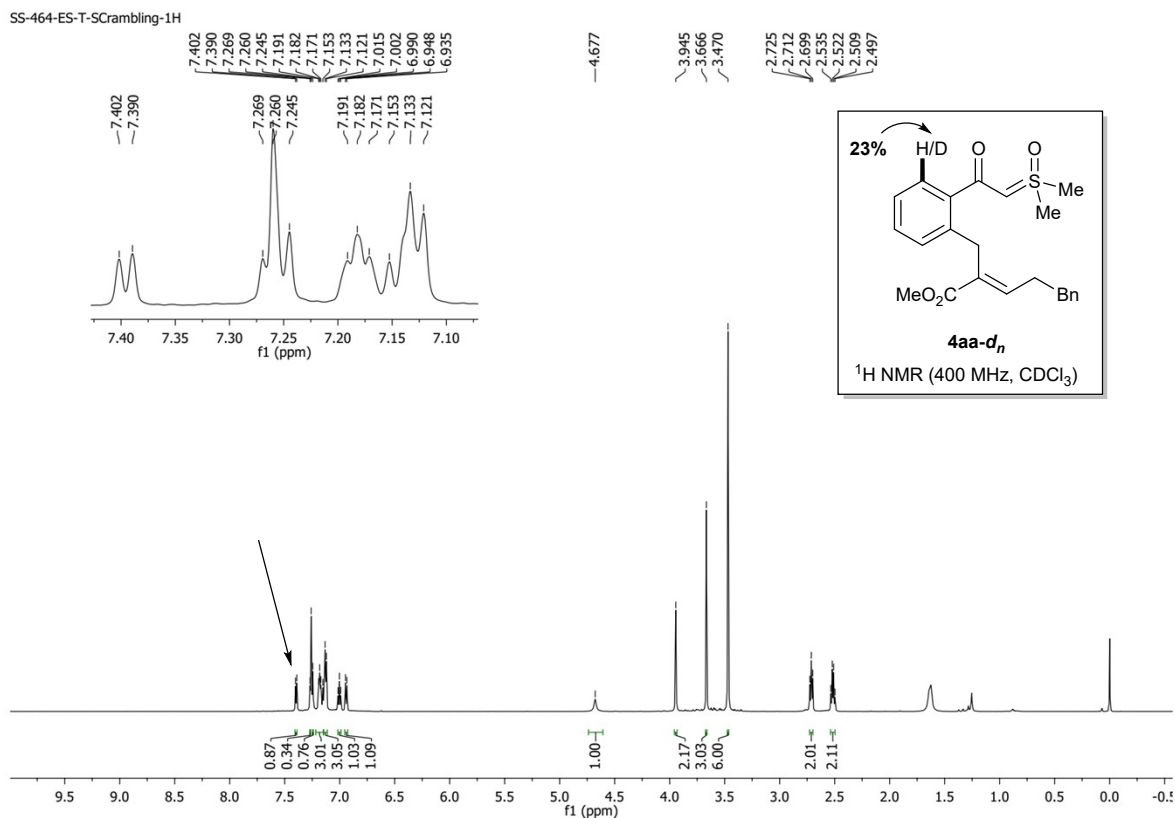

## Kinetic Isotope Effect Experiments

### C-H Annulation

**Parallel Experiment.** Two round bottom flasks were charged with **1a** (0.1 mmol, 20 mg, 1.0 equiv) or 2-(dimethyl(oxo)-16-sulfaneylidene)-1-(phenyl-*d*<sub>5</sub>)ethan-1-one **1a-d<sub>5</sub>** (0.1 mmol, 21 mg, 1.0 equiv), **2a** (0.15 mmol, 28 mg, 1.5 equiv), [Cp\*Rh(CH<sub>3</sub>CN)<sub>3</sub>](SbF<sub>6</sub>)<sub>2</sub> (0.0025 mmol, 2.1 mg, 0.025 equiv), and Zn(OAc)<sub>2</sub> (0.1 mmol, 18 mg, 1.0 equiv) were stirred in TFE (1 mL) at 80 °C for 2 h under N<sub>2</sub> atmosphere. Then both the reaction mixtures were combined. Evaporation of the solvent furnished a residue, which was extracted using EtOAc (10 mL) and washed with water (5 mL). Drying (Na<sub>2</sub>SO<sub>4</sub>) and evaporation of the solvent gave a residue that was stirred with K<sub>2</sub>CO<sub>3</sub> (0.3 mmol, 41 mg, 3.0 equiv) and MeI (0.5 mmol, 33 μL, 5.0 equiv) in acetone (2 mL) at room temperature for 3 h. After completion (monitored by TLC), evaporation of the solvent provided a residue that was extracted with EtOAc (2 x 10 mL) and was washed with water (10 mL). Drying (Na<sub>2</sub>SO<sub>4</sub>) and evaporation of the solvent gave a residue that was purified on silica gel column chromatography as described in the general procedure to afford **3aa** and **3aa-d<sub>4</sub>**. The KIE value was determined to be  $k_H/k_D = 1.94$  on the basis of <sup>1</sup>H NMR analysis.

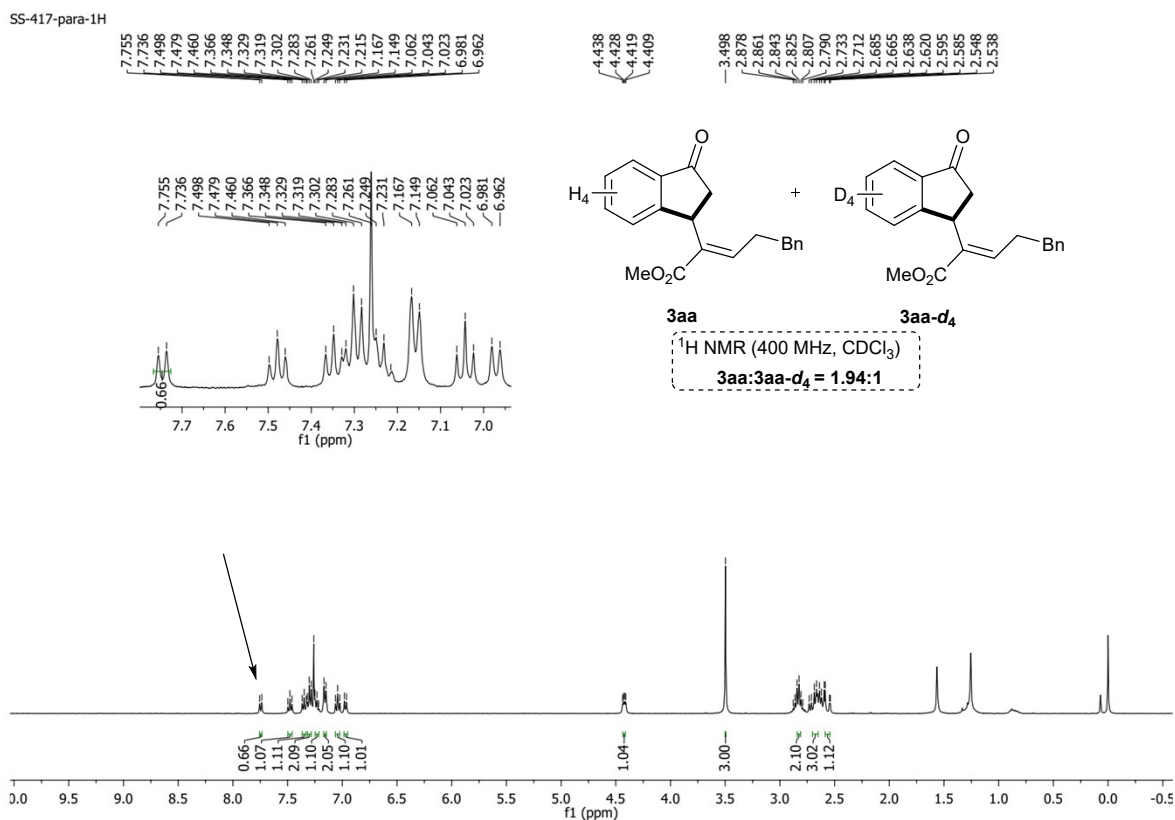

**Competitive Experiment:** A mixture of **1a** (0.1 mmol, 20 mg, 1.0 equiv), 2-(dimethyloxylidene)-1-(phenyl-*d*<sub>5</sub>)ethan-1-one **1a-d<sub>5</sub>** (0.1 mmol, 21 mg, 1.0 equiv), **2a** (0.30 mmol, 56 mg, 1.5 equiv), [Cp\*Rh(CH<sub>3</sub>CN)<sub>3</sub>](SbF<sub>6</sub>)<sub>2</sub> (0.005 mmol, 4.2 mg, 0.025 equiv), and Zn(OAc)<sub>2</sub> (0.2 mmol, 36 mg, 1.0 equiv) was stirred in TFE (1.5 mL) at 80 °C for 2 h under N<sub>2</sub> atmosphere. Evaporation of the solvent furnished a residue, which was extracted using EtOAc (10 mL) and washed with water (5 mL). Drying (Na<sub>2</sub>SO<sub>4</sub>) and evaporation of the solvent gave a residue that was stirred with K<sub>2</sub>CO<sub>3</sub> (0.6 mmol, 82 mg, 3.0 equiv) and MeI (1 mmol, 66 μL, 5.0 equiv) in acetone (4 mL) at room temperature for 3 h. After completion (monitored by TLC), evaporation of the solvent provided a residue that was extracted with EtOAc (2 x 10 mL) and was washed with water (10 mL). Drying (Na<sub>2</sub>SO<sub>4</sub>) and evaporation of the solvent gave a residue that was purified on silica gel column chromatography as described in the general procedure to afford **3aa** and **3aa-d<sub>4</sub>**. The KIE value was determined to be  $k_H/k_D = 1.77$  on the basis of <sup>1</sup>H NMR analysis.



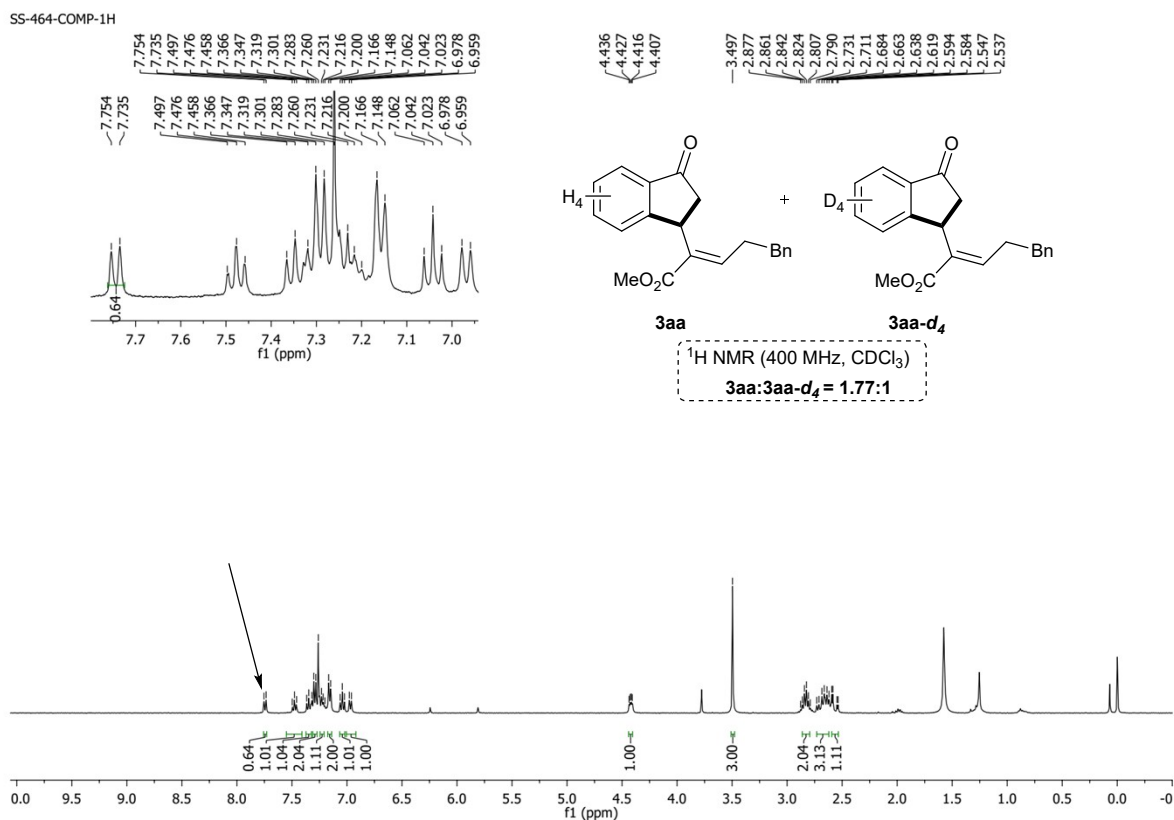

## C-H Allylation

**Parallel Experiment.** Two round bottom flasks were charged with **1a** (0.1 mmol, 20 mg, 1.0 equiv) or 2-(dimethyl(oxo)-16-sulfaneylidene)-1-(phenyl-*d*<sub>5</sub>)ethan-1-one **1a-d<sub>5</sub>** (0.1 mmol, 21 mg, 1.0 equiv), **2a** (0.15 mmol, 28 mg, 1.5 equiv), [Cp\*RhCl<sub>2</sub>]<sub>2</sub> (0.0025 mmol, 1.5 mg, 0.025 equiv), Zn(OAc)<sub>2</sub> (0.1 mmol, 18 mg, 1.0 equiv), and PivOH (0.1 mmol, 10 mg, 1.0 equiv) were stirred in TFE (1 mL) at 80 °C for 2 h under N<sub>2</sub> atmosphere. Then both the reaction mixtures were combined. Evaporation of the solvent furnished a residue, which was extracted using EtOAc (10 mL) and washed with water (5 mL). Drying (Na<sub>2</sub>SO<sub>4</sub>) and evaporation of the solvent gave a residue that was stirred with K<sub>2</sub>CO<sub>3</sub> (0.3 mmol, 41 mg, 3.0 equiv) and MeI (0.5 mmol, 33 μL, 5.0 equiv) in acetone (2 mL) at room temperature for 3 h. After completion (monitored by TLC), evaporation of the solvent provided a residue that was extracted with EtOAc (2 x 10 mL) and was washed with water (10 mL). Drying (Na<sub>2</sub>SO<sub>4</sub>) and evaporation of the solvent gave a residue that was purified on silica gel column chromatography as described in the general procedure to afford **4aa** and **4aa-d<sub>4</sub>**. The KIE value was determined to be  $k_H/k_D = 3.16$  on the basis of <sup>1</sup>H NMR analysis.

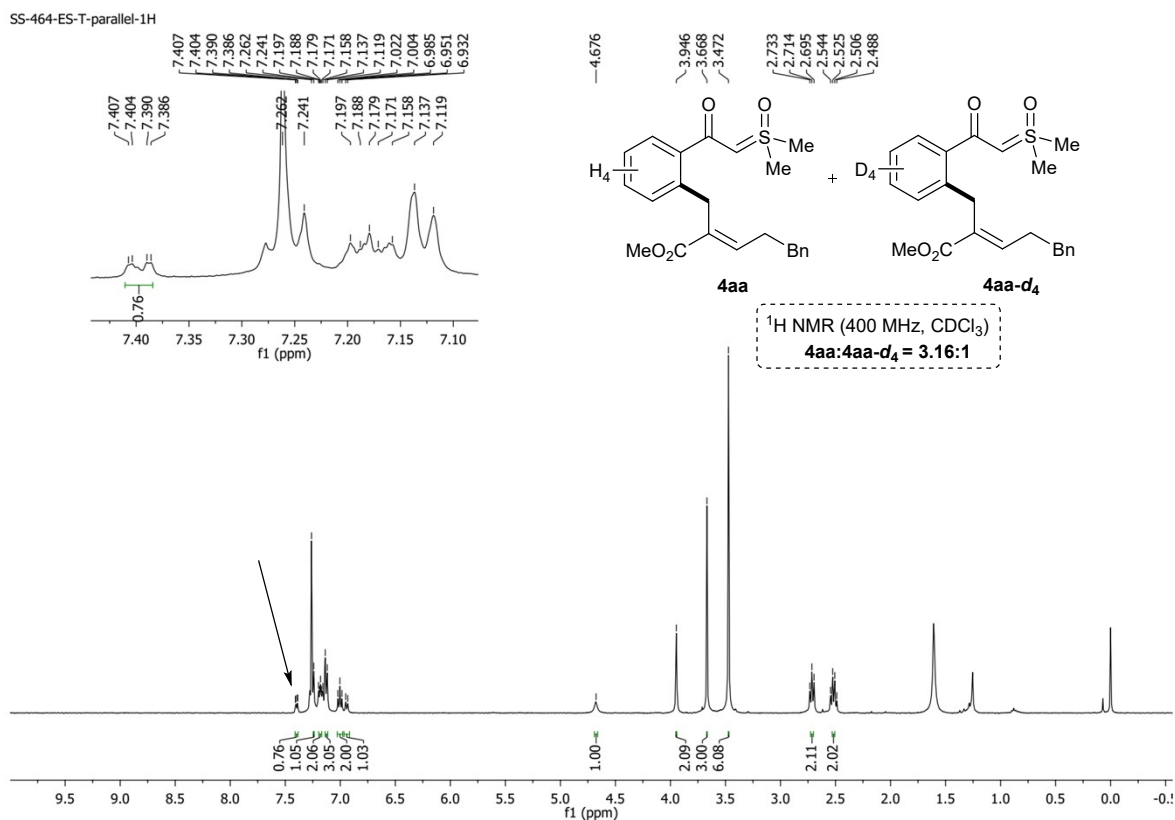

**Competitive Experiment:** A mixture of **1a** (0.1 mmol, 20 mg, 1.0 equiv), 2-(dimethyl(oxo)-16-sulfaneylidene)-1-(phenyl-*d*<sub>5</sub>)ethan-1-one **1a-d<sub>5</sub>** (0.1 mmol, 21 mg, 1.0 equiv), **2a** (0.30 mmol, 56 mg, 1.5 equiv), [Cp\*RhCl<sub>2</sub>]<sub>2</sub> (0.005 mmol, 3.1 mg, 0.025 equiv), Zn(OAc)<sub>2</sub> (0.2 mmol, 36 mg, 1.0 equiv), and PivOH (0.2 mmol, 20 mg, 1.0 equiv) was stirred in TFE (1.5 mL) at 80 °C for 2 h under N<sub>2</sub> atmosphere. Evaporation of the solvent produced a resultant residue that was extracted using EtOAc (10 mL) and washed with water (5 mL). Drying (Na<sub>2</sub>SO<sub>4</sub>) and evaporation of the solvent gave a residue that was stirred with K<sub>2</sub>CO<sub>3</sub> (0.6 mmol, 82 mg, 3.0 equiv) and MeI (1.0 mmol, 66 μL, 5.0 equiv) in acetone (4 mL) at room temperature for 3 h. After completion (monitored by TLC), evaporation of the solvent provided a residue that was extracted with EtOAc (2 x 10 mL) and was washed with water (10 mL). Drying (Na<sub>2</sub>SO<sub>4</sub>) and evaporation of the solvent gave a residue that was purified on silica gel column chromatography as described in the general procedure to afford **4aa** and **4aa-d<sub>4</sub>**. The KIE value was determined to be  $k_H/k_D = 2.70$  on the basis of <sup>1</sup>H NMR analysis.

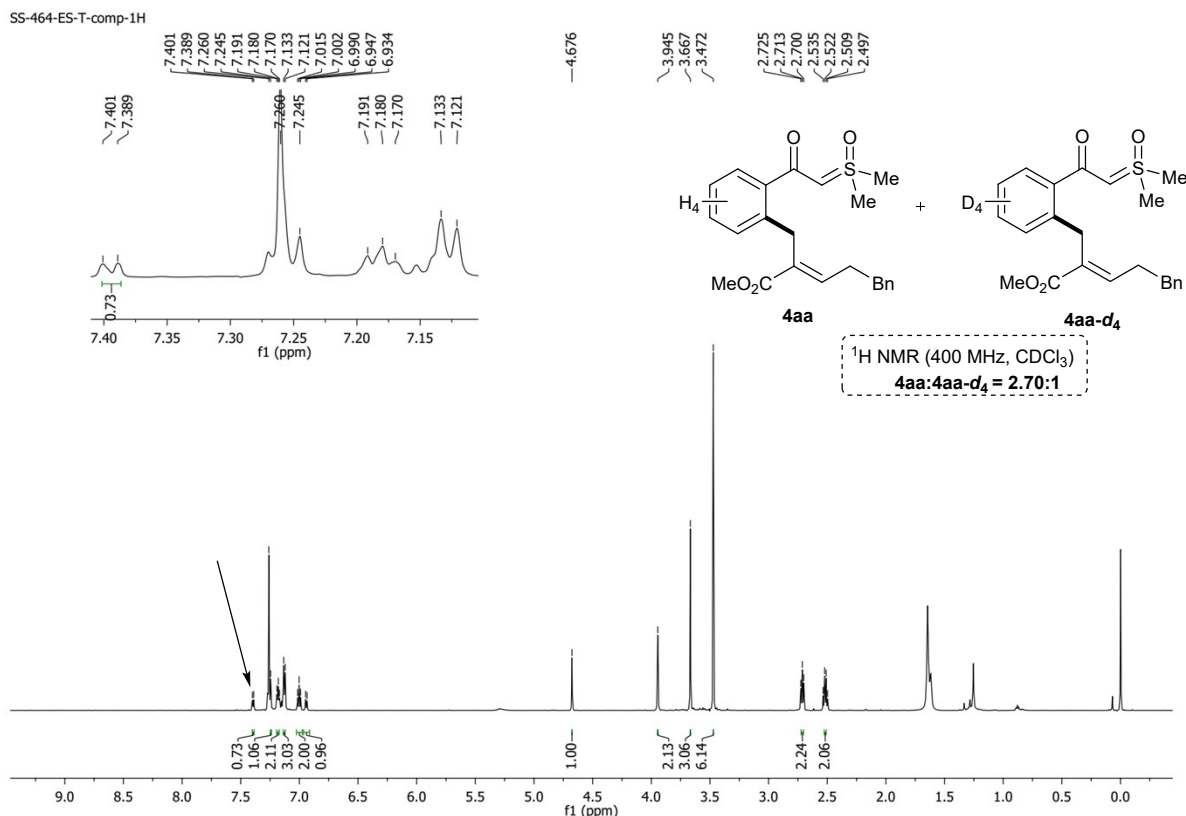

## References

1. M. P. Huestis, L. Chan, D. R. Stuart and K. Fagnou, *Angew. Chem. Int. Ed.*, 2011, **50**, 1338.
2. For preparation of sulfoxonium ylides, see: (a) S. Kumar, S. Nunewar, T. K. Sabbi and V. Kanchupalli, *Org. Lett.*, 2022, **24**, 3395; (b) P. S. K. Prabhakar Ganesh, P. Muthuraja and P. Gopinath, *Org. Lett.*, 2023, **25**, 8361; (c) A. C. B. Burtoloso, J. H. de Souza and J. A. M. Vargas, *Synthesis*, 2024, **56**, 758.
3. For preparation of methylene- $\beta$ -lactams, see: (a) N. Riemer, M. Riemer, M. Krüger, G. J. Clarkson, M. Shipman and B. Schmidt, *J. Org. Chem.*, 2021, **86**, 8786; For preparation of  $\alpha$ -methylene- $\beta$ -lactones, see: (b) M. Bian, K. Ma, H. Mawjuda, X. Yu, X. Li, H. Gao, Z. Zhou and W. Yi, *Org. Biomol. Chem.*, 2019, **17**, 6114; (c) R. Zhou, S. Fan, L. Fang, B. Chu and J. Zhu, *Org. Lett.*, 2023, **25**, 8688; (d) H. Bhattacharyya, S. Saha, K. Verma and T. Punniyamurthy, *Chem. Commun.*, 2025, **61**, 4200.
4. (a) D. Wang, M. D. Schwinden, L. Radesca, B. Patel, D. Kronenthal, M.-H. Huang and W. A. Nugent, *J. Org. Chem.*, 2004, **69**, 1629; (b) A. Adachi, K. Aikawa, Y. Ishibashi, K. Nozaki and T. Okazoe, *Chem. - Eur. J.*, 2021, **27**, 11919; (c) B. Yang, S.-J. Li, Y. Wang, Y. Lan and S. Zhu, *Nat. Commun.*, 2021, **12**, 5257; (d) R. Echemendía, K. T. de Oliveira and A. C. B. Burtoloso, *Org. Lett.*, 2022, **24**, 6386.

# NMR (<sup>1</sup>H, <sup>13</sup>C and <sup>19</sup>F) Spectra

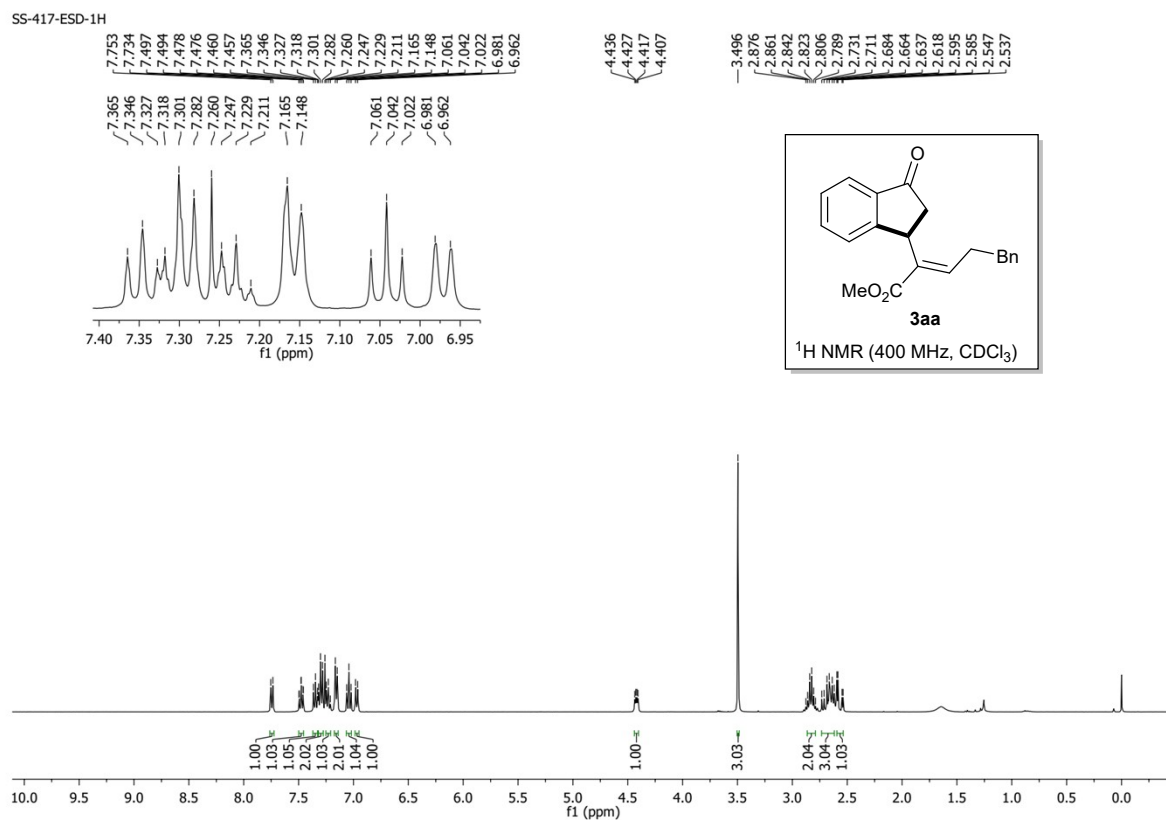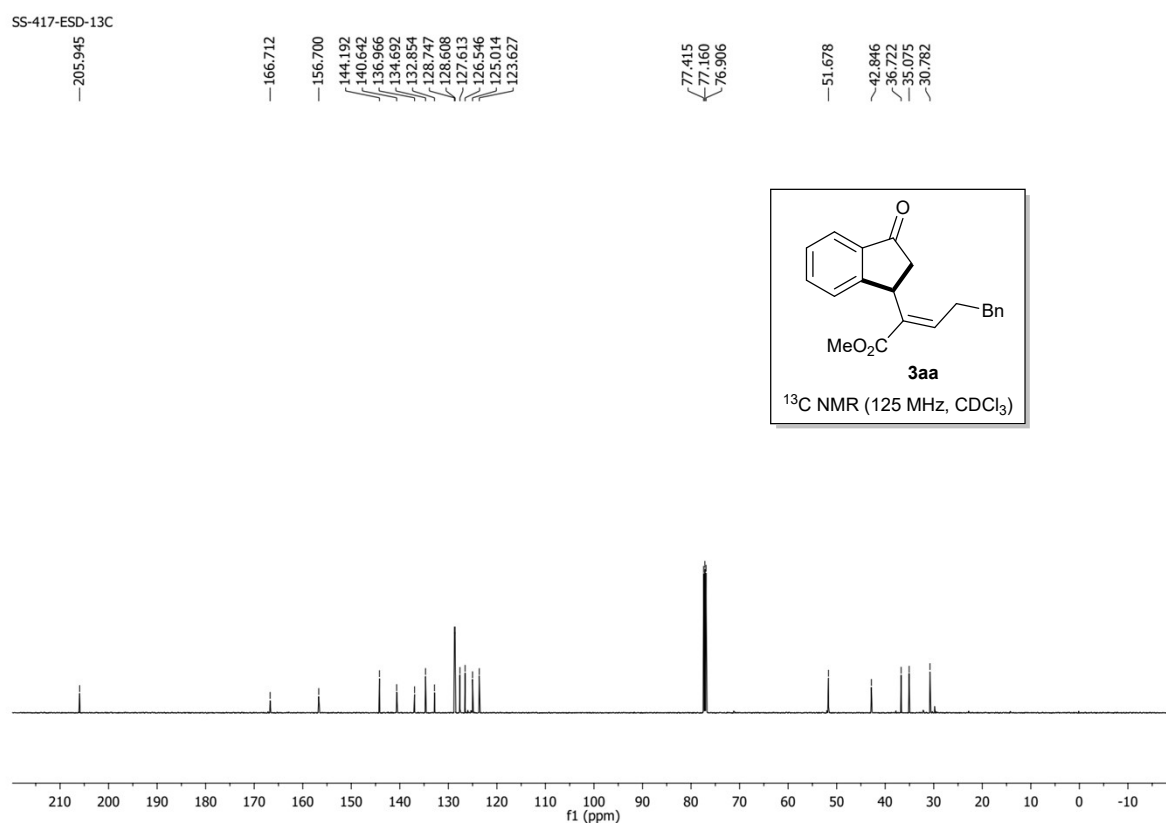

SS-452-ES-D-1H

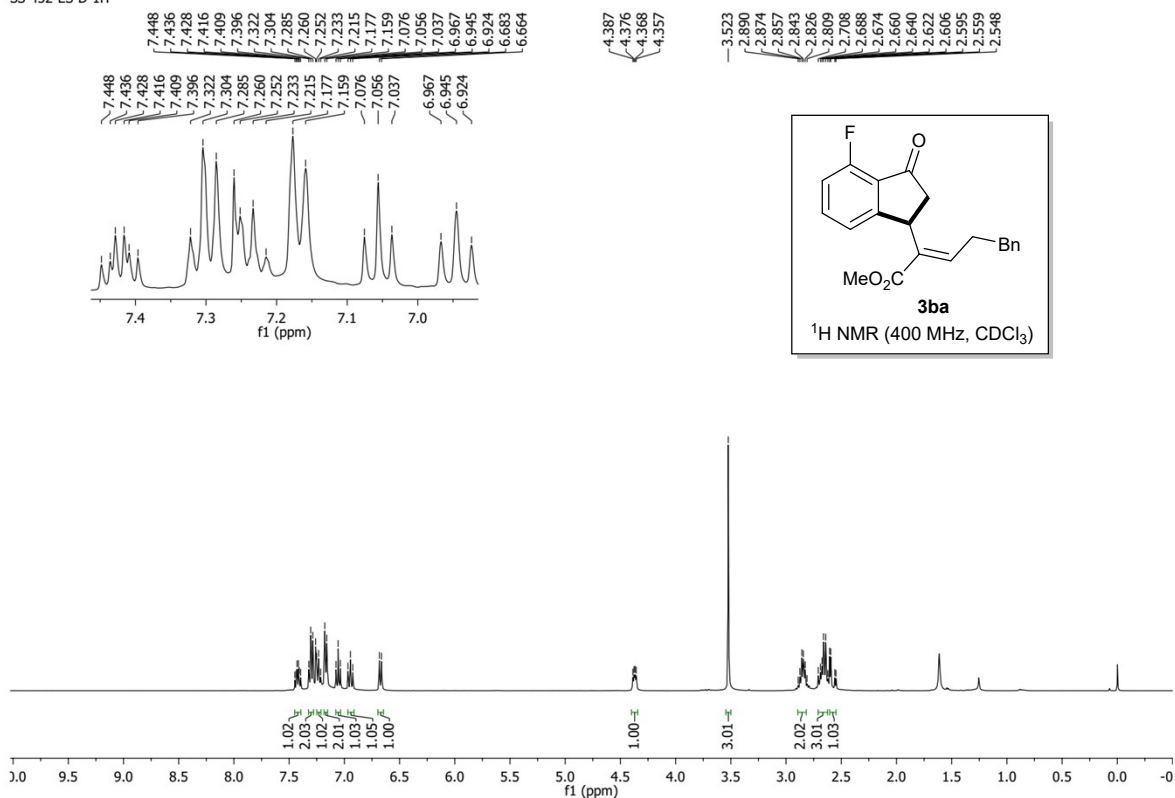

SS-452-ES-D-13C

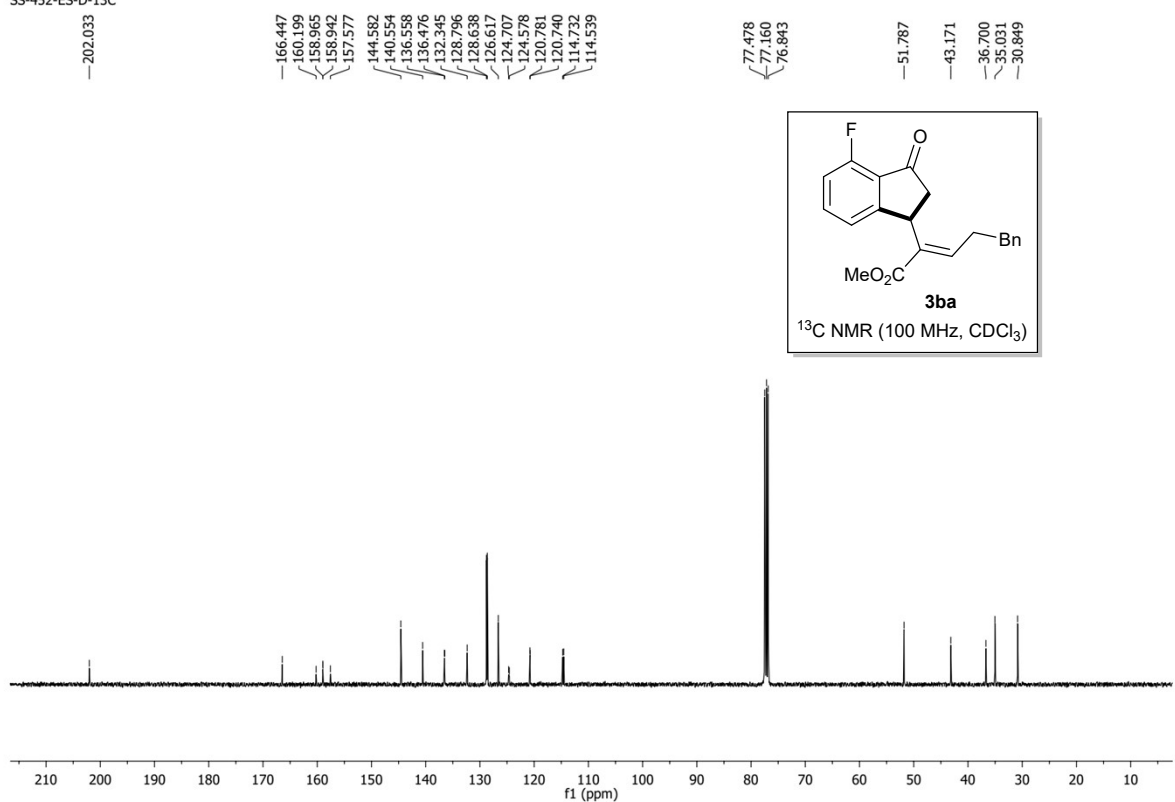

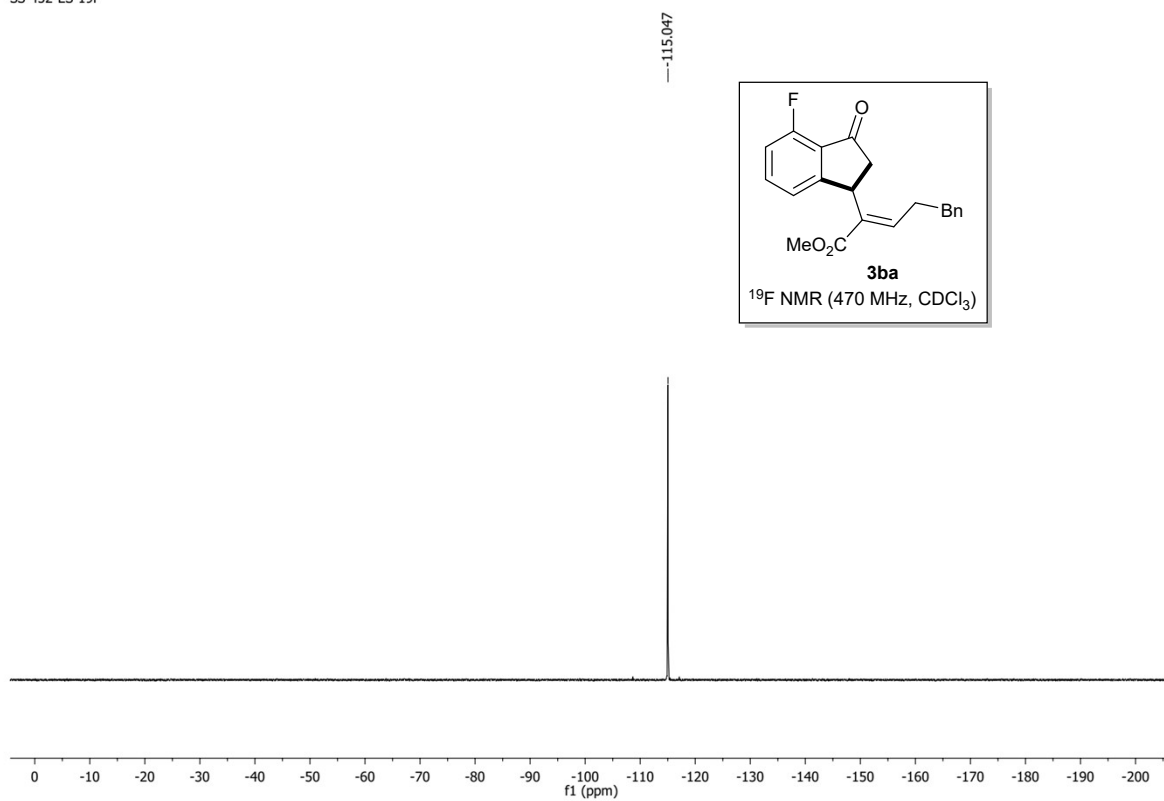

SS-448-ES-D-1H

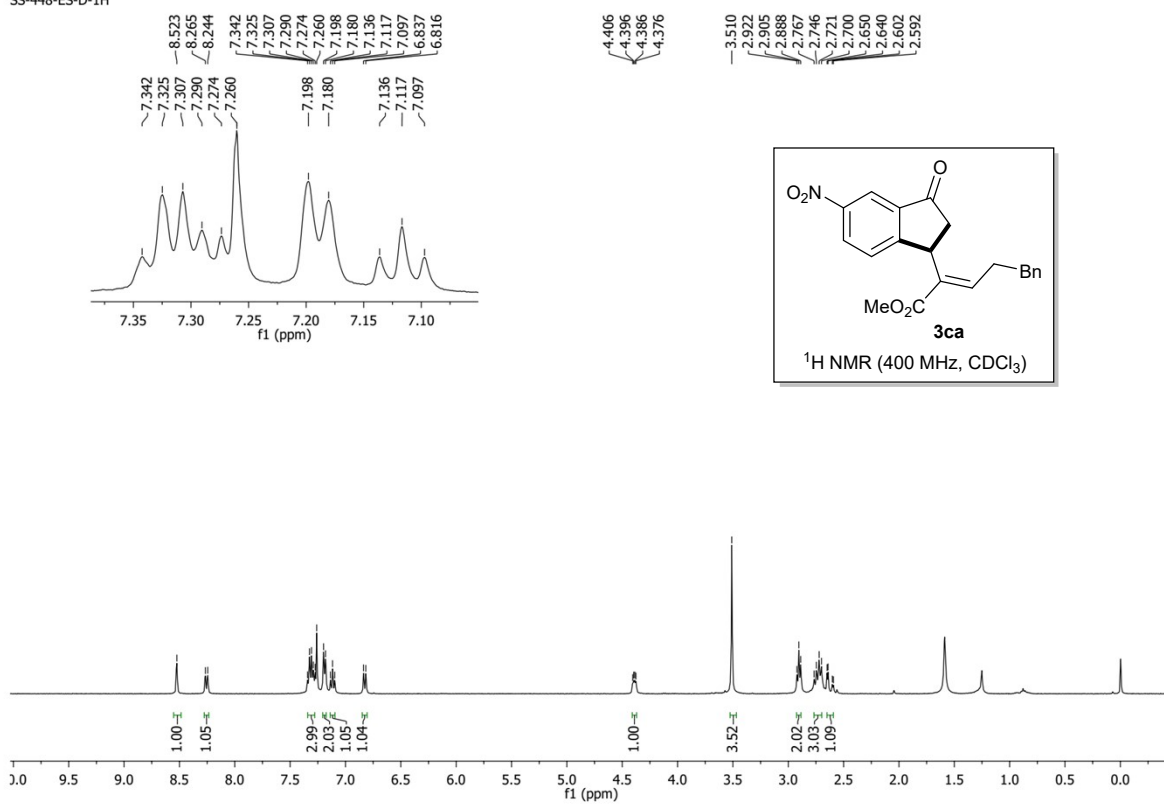

SS-448-ES-D-13C

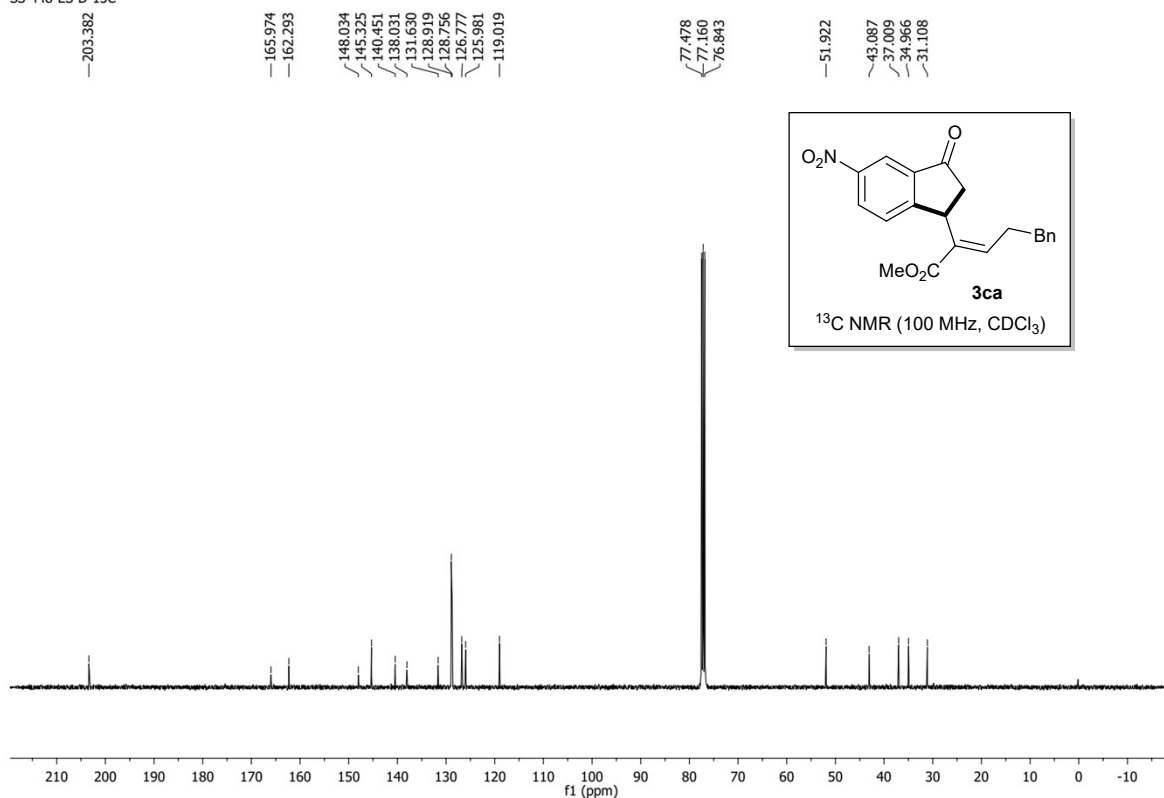

SS-425-ES-D-1H

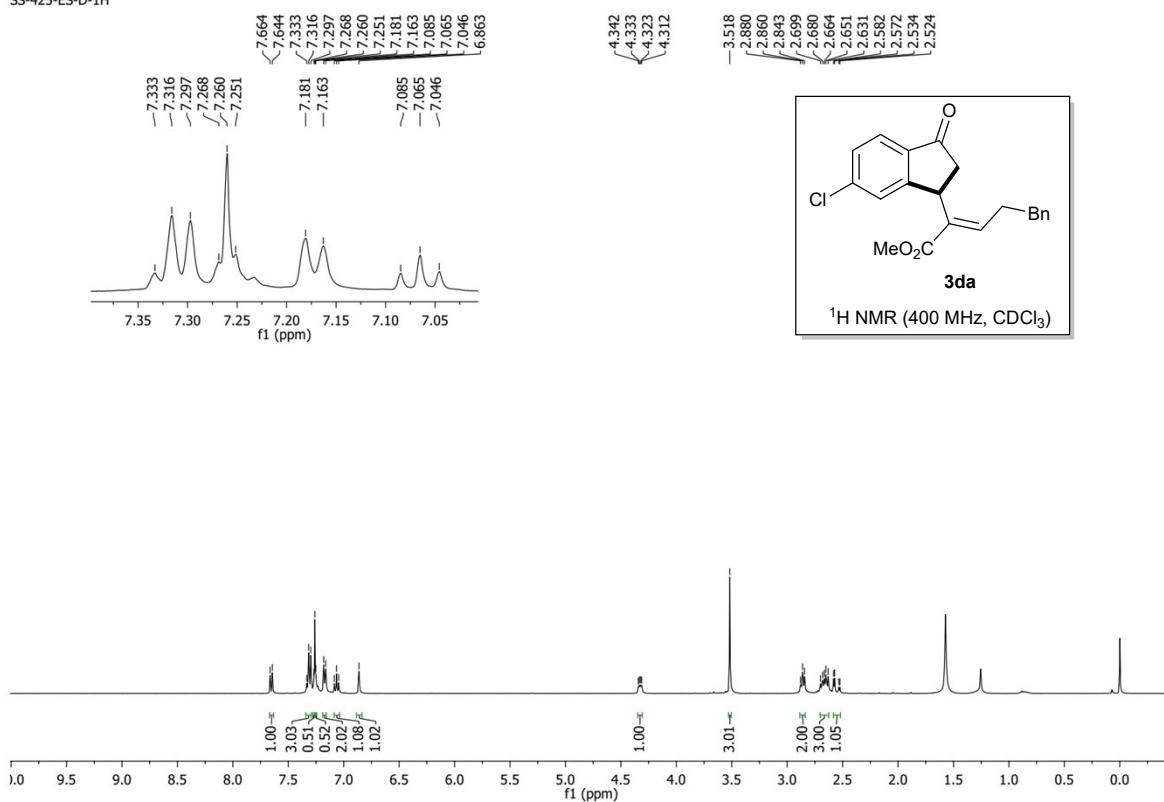

SS-425-ES-D-13C

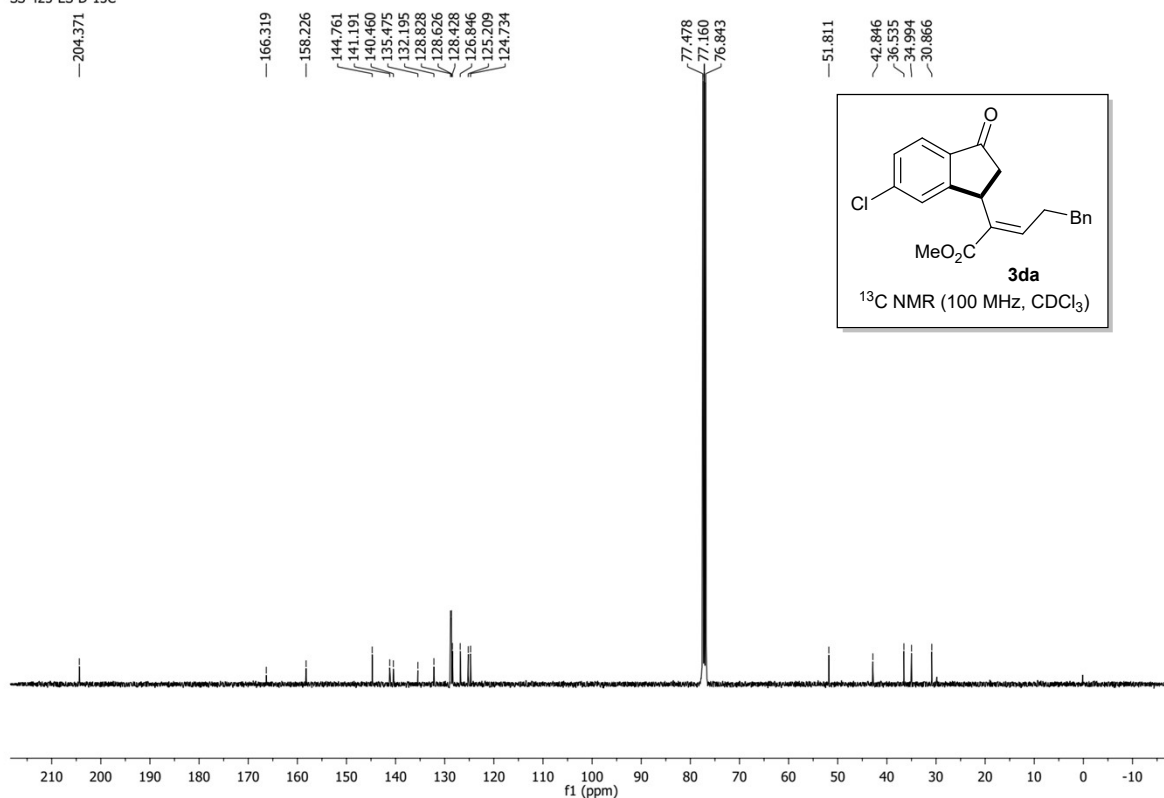

SS-421-ES-D-1H

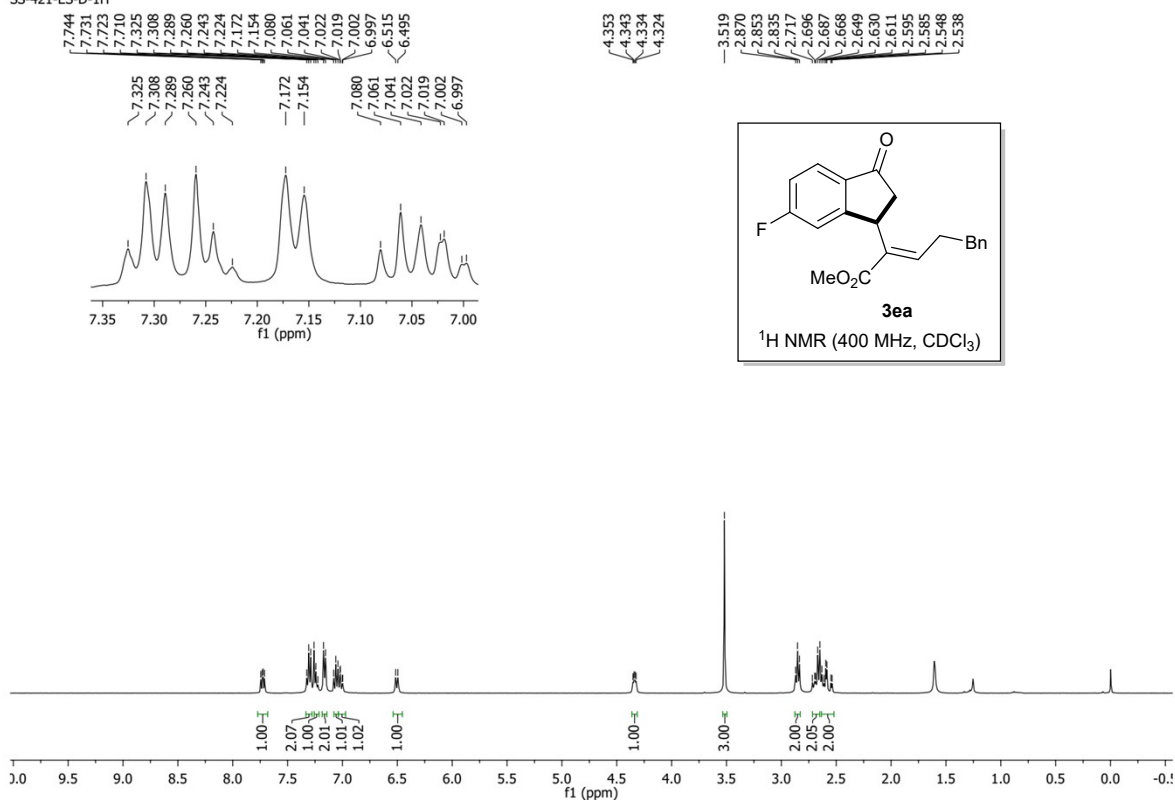



SS-421-ES-D-13C

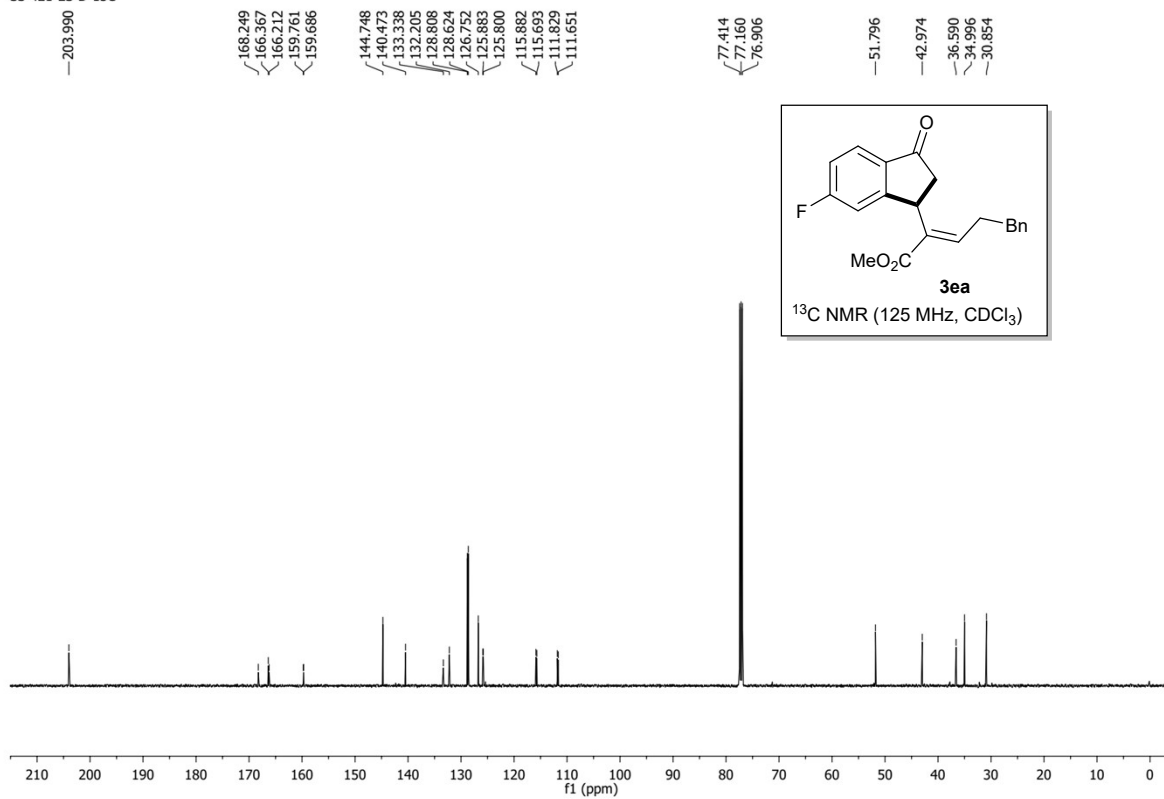

SS-421-ES-D-19F

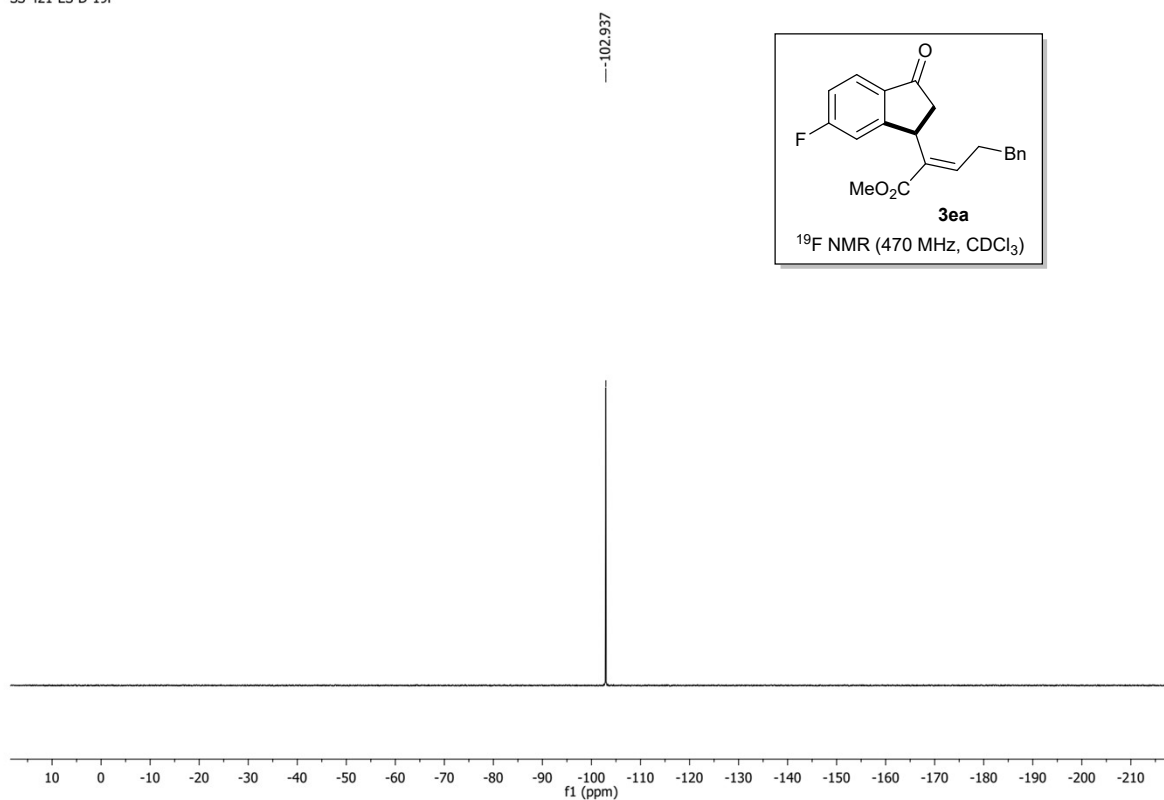

SS-418-ES-D-1H

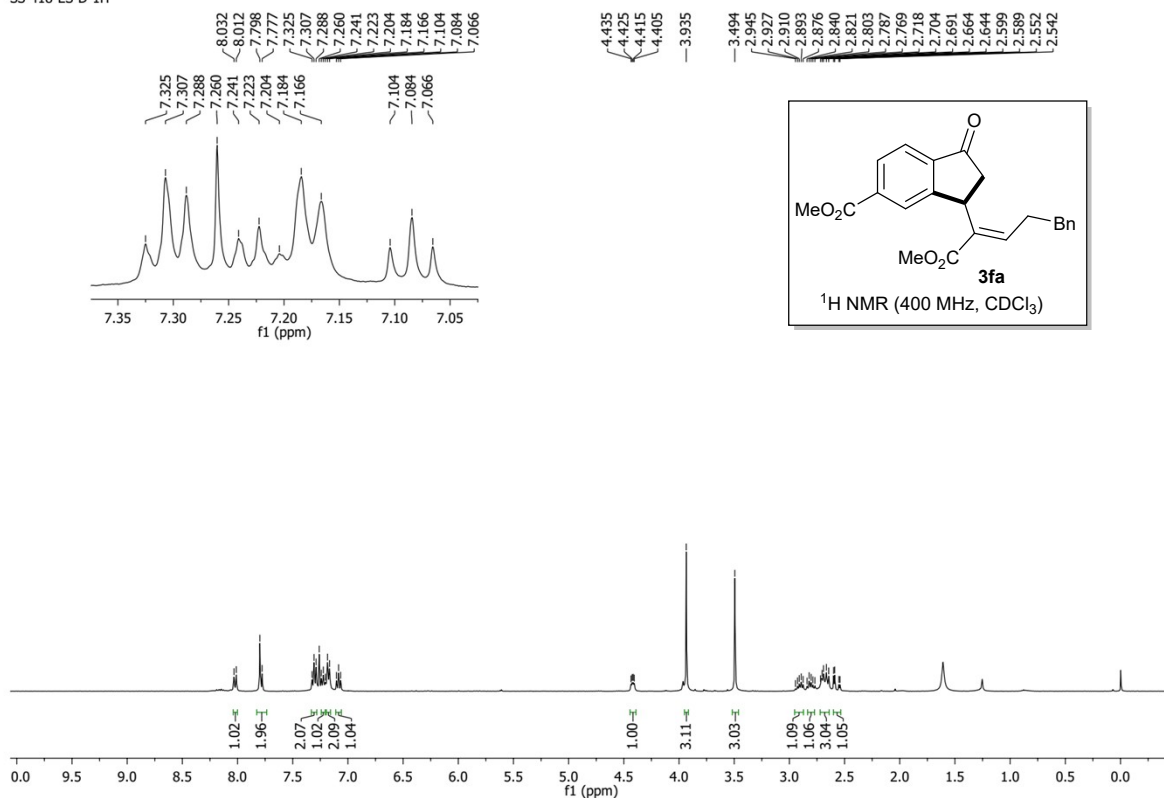

SS-418-ES-D-13C

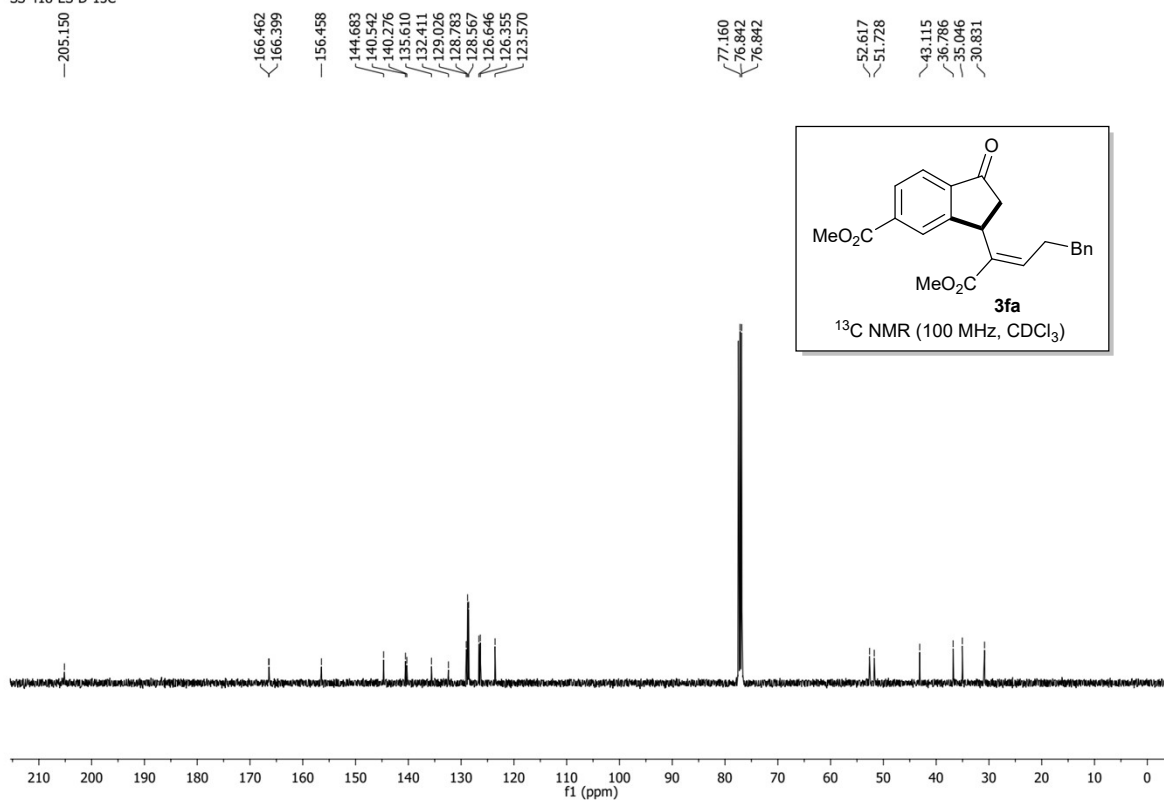

SS-420-ES-D-1H

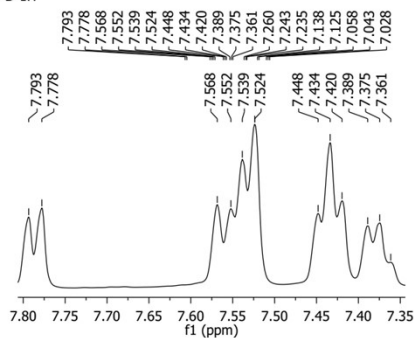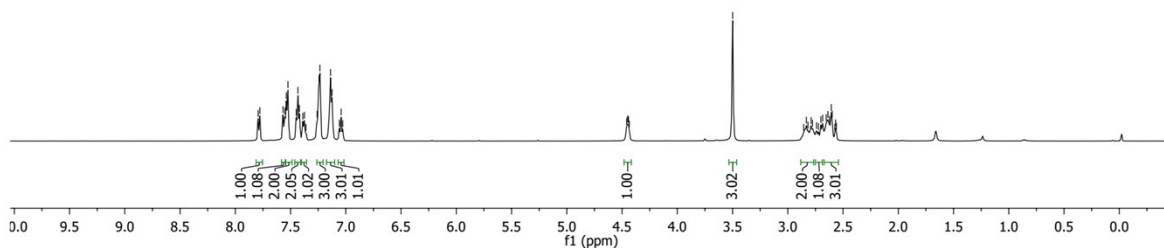

SS-420-ES-D-13C

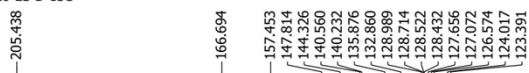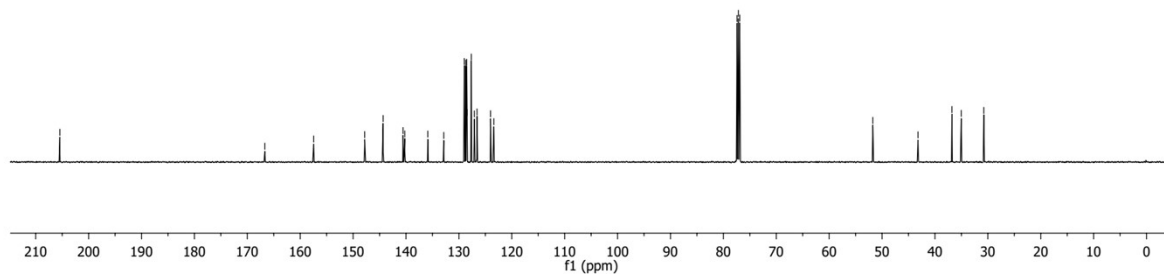

SS-427-ES-D-1H

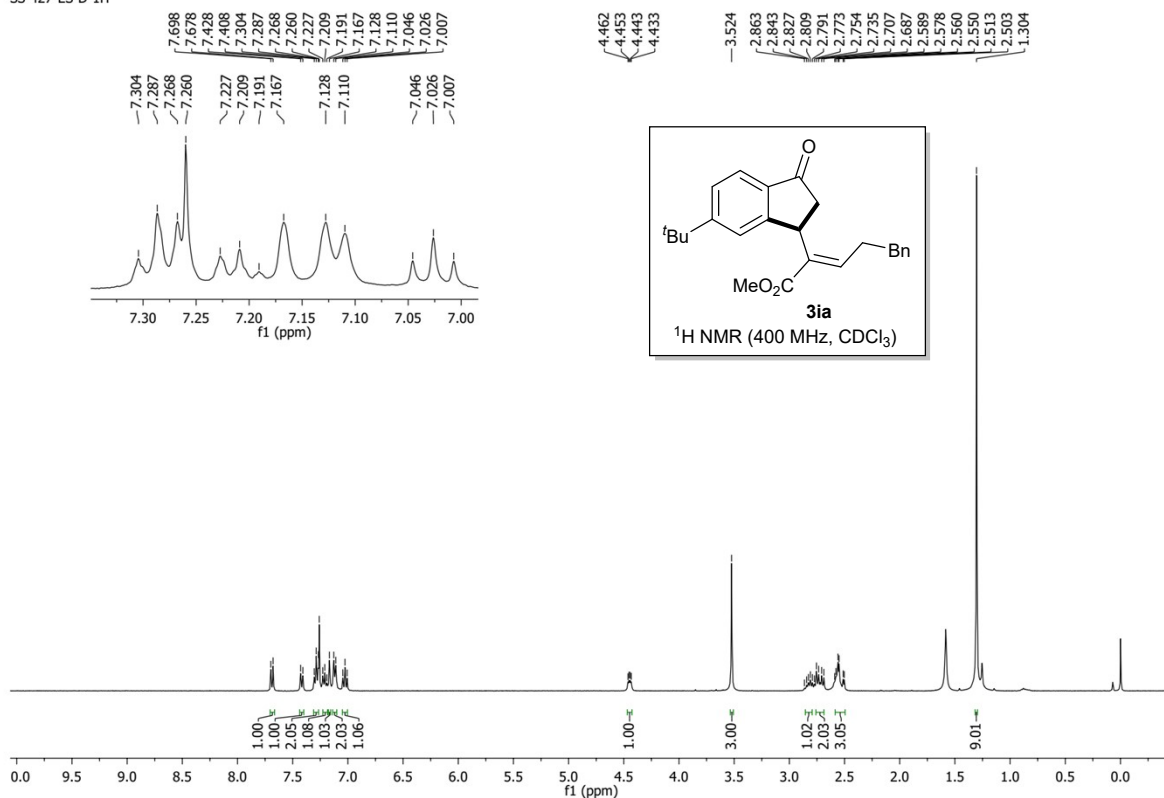

SS-427-ES-D-13C

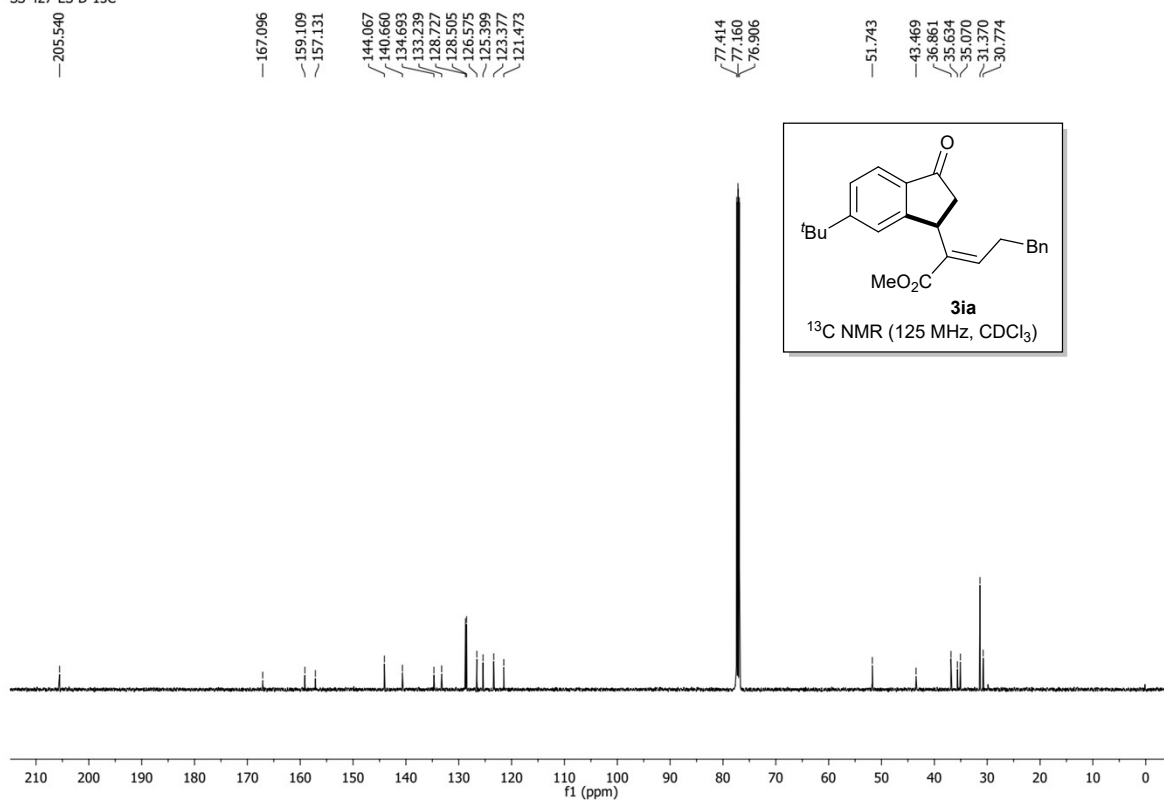

SS-442-ES-D-1H

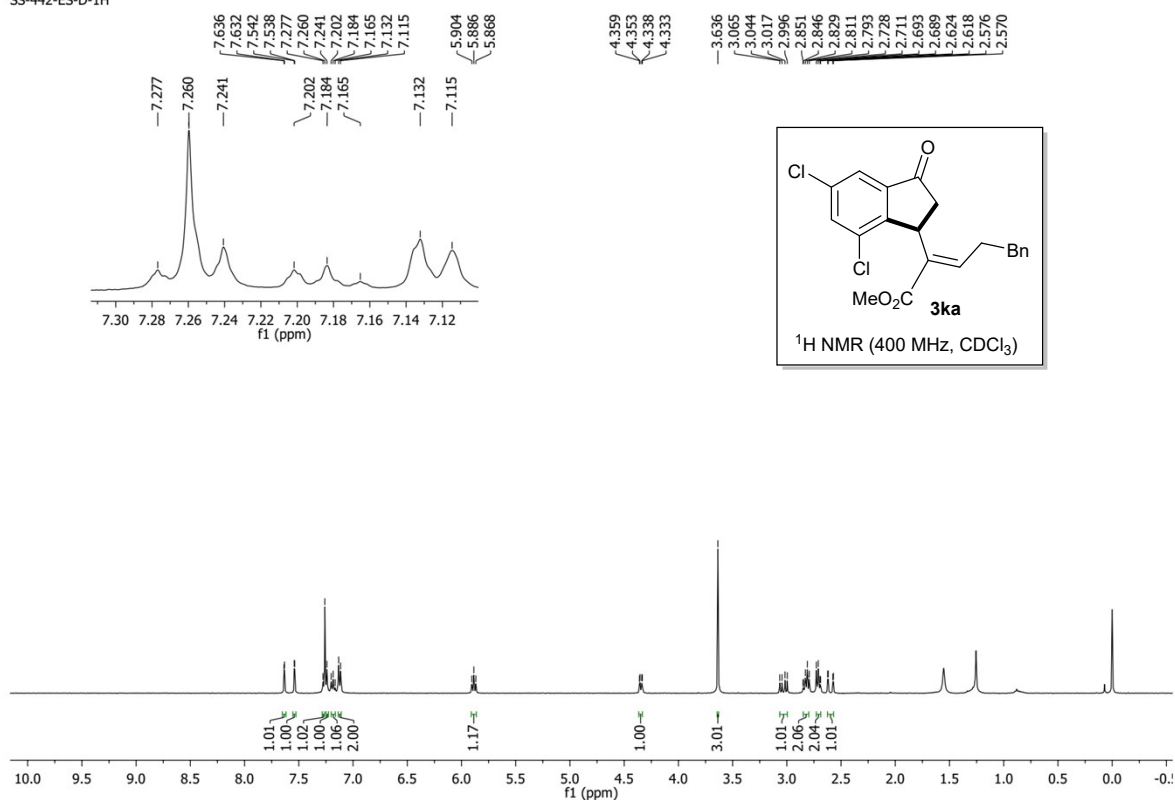

SS-442-ES-D-13C

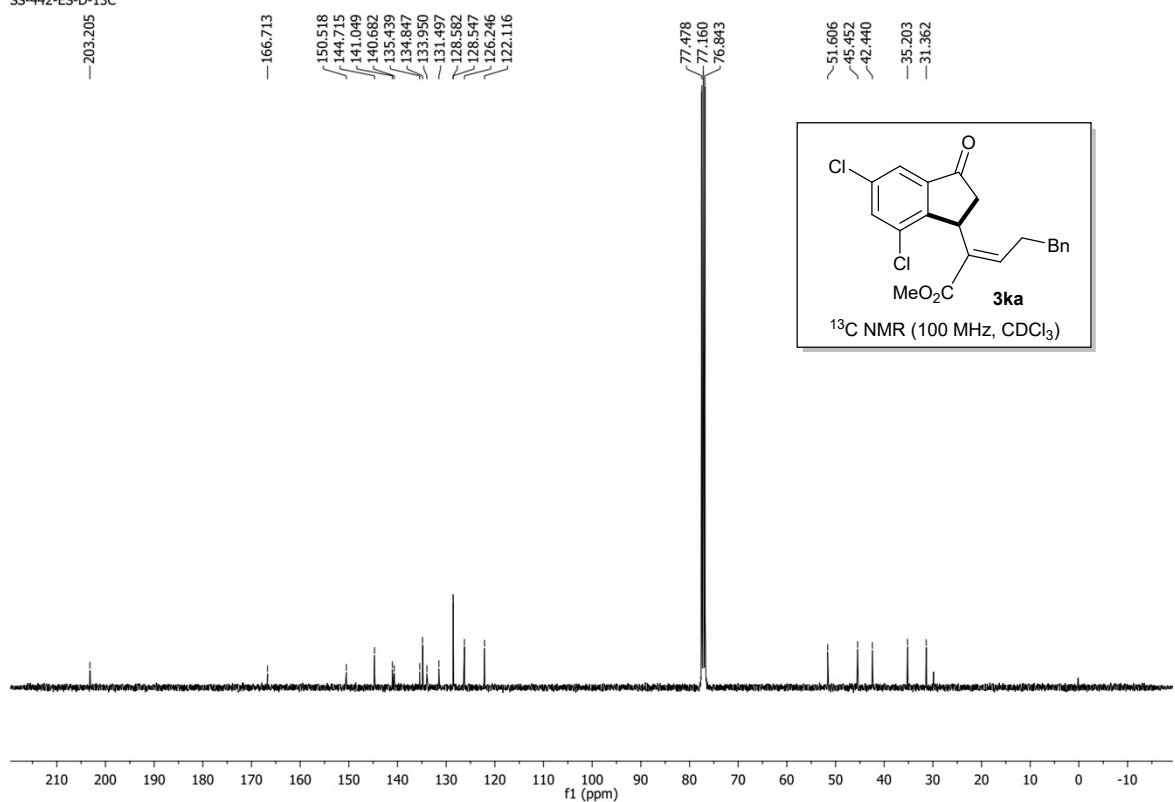

SS-428-ES-D-1H

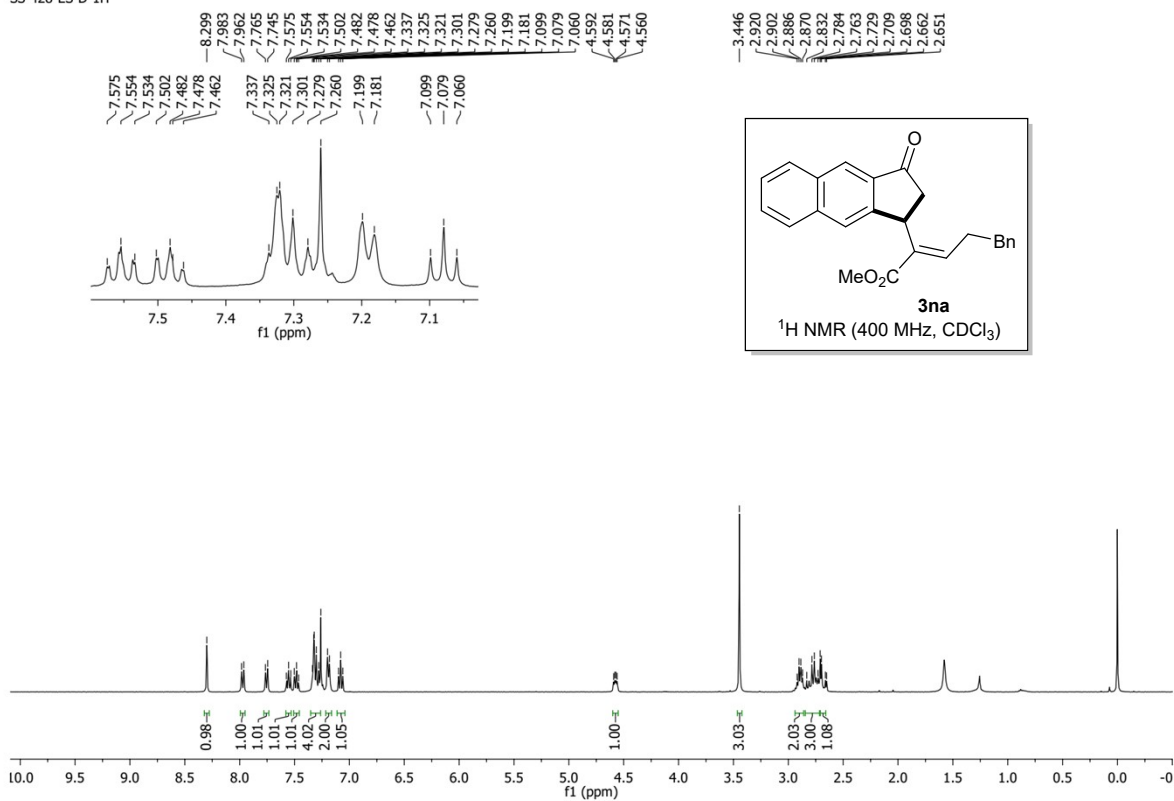

SS-428-ES-D-13C

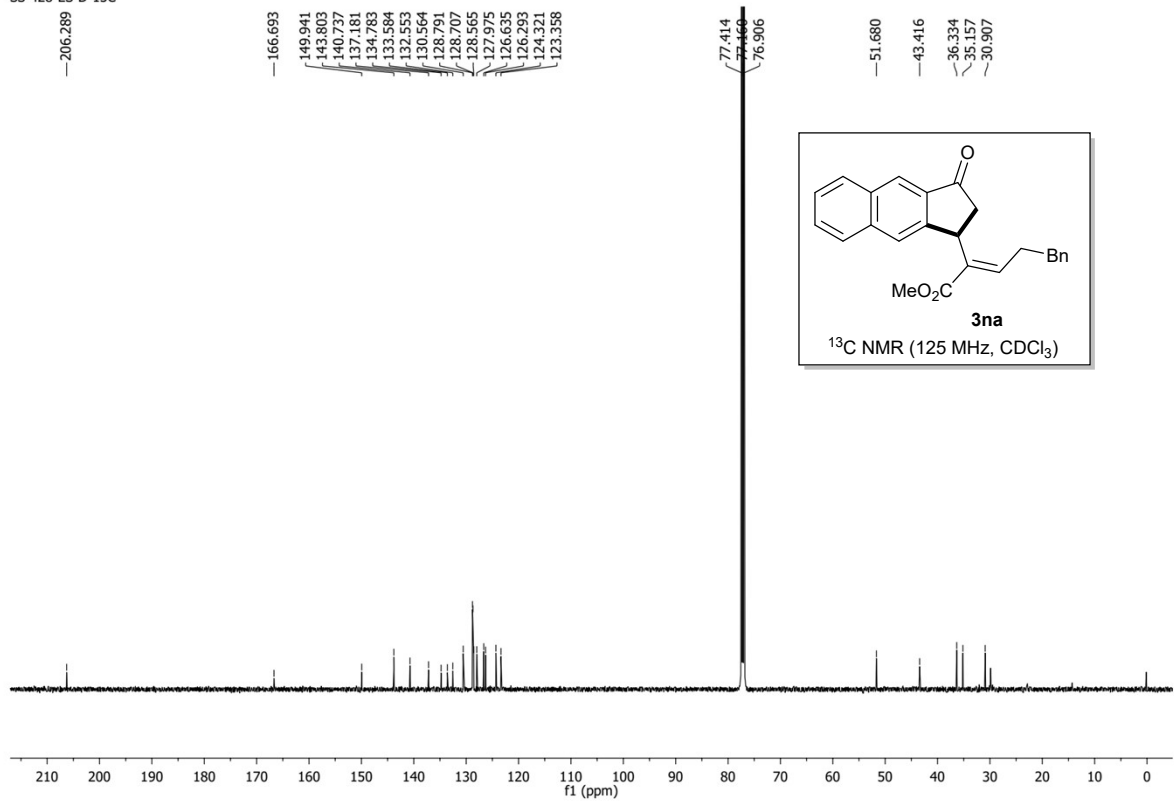

SS-445-ES-D-1H

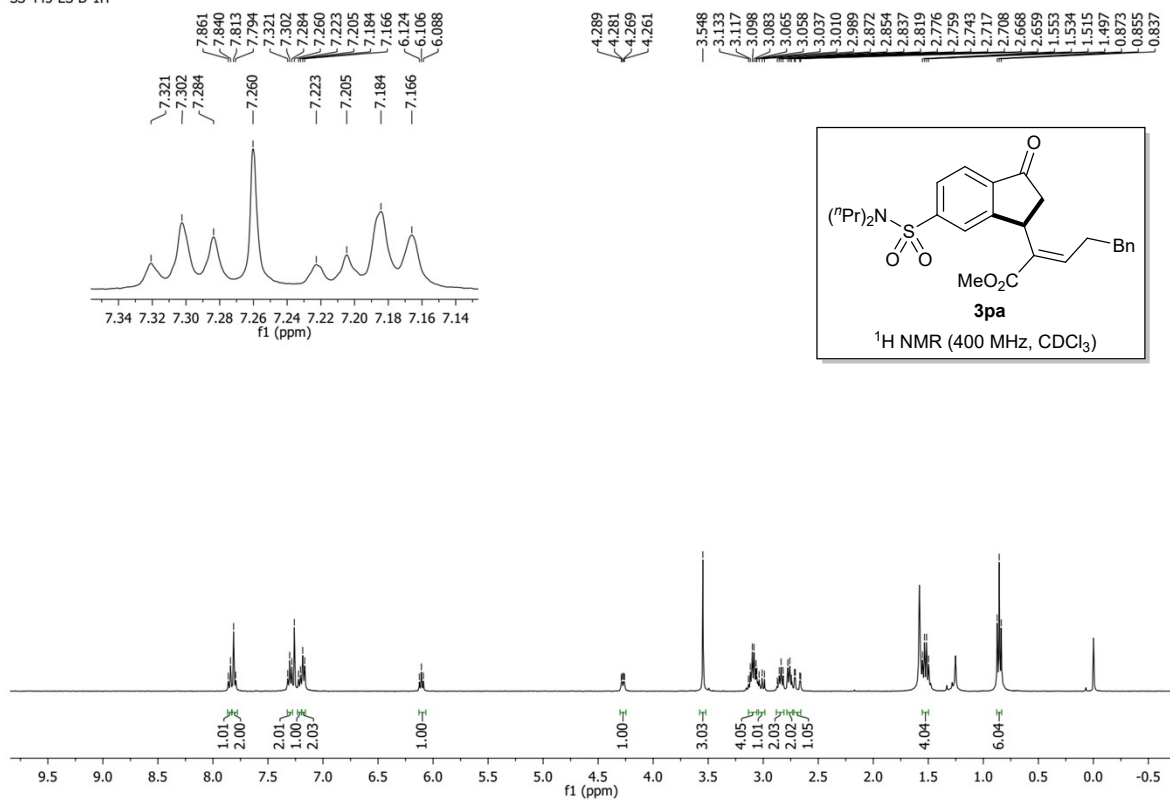

SS-445-ES-D-13C

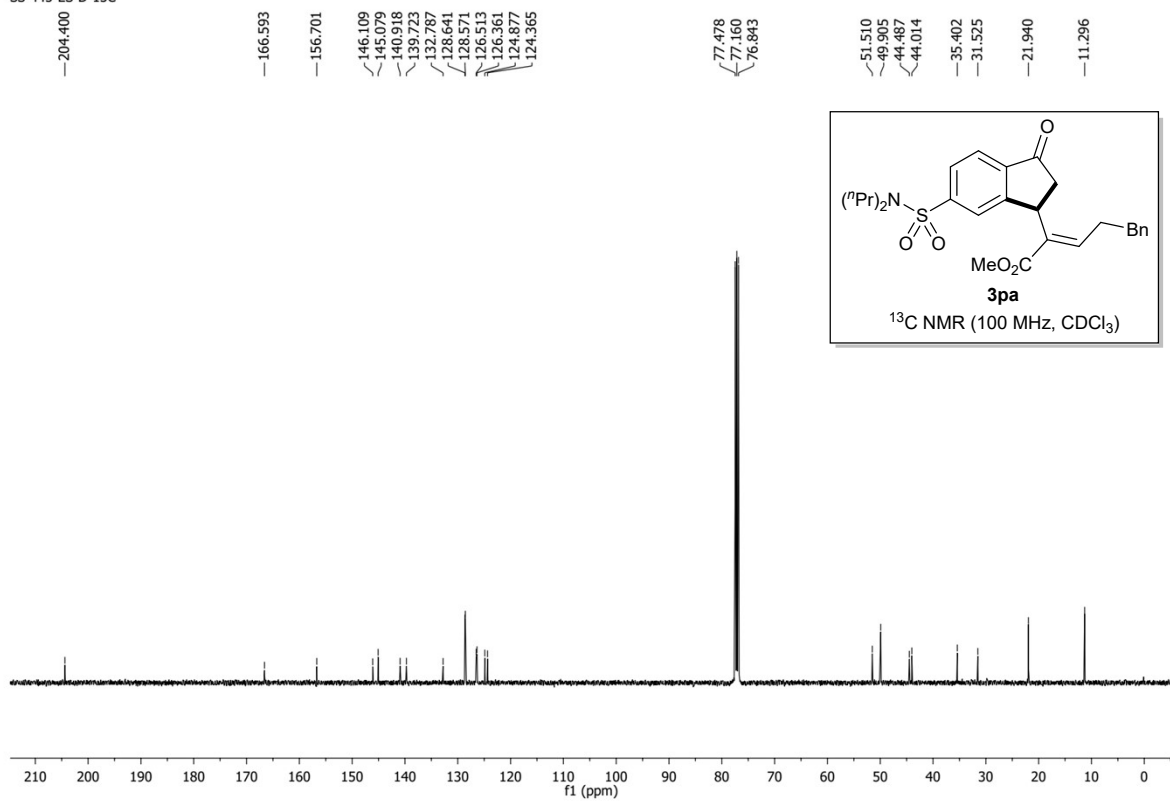

SS-443-ES-D-1H

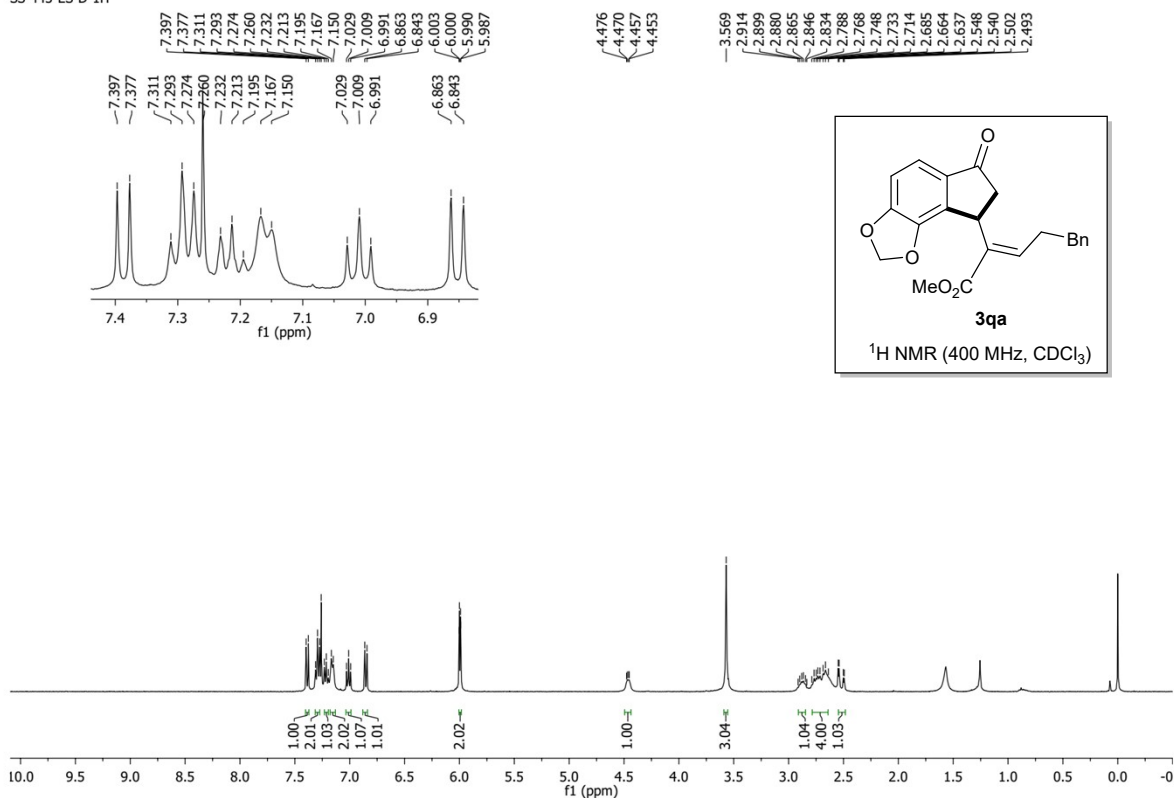

SS-443-ES-D-13C

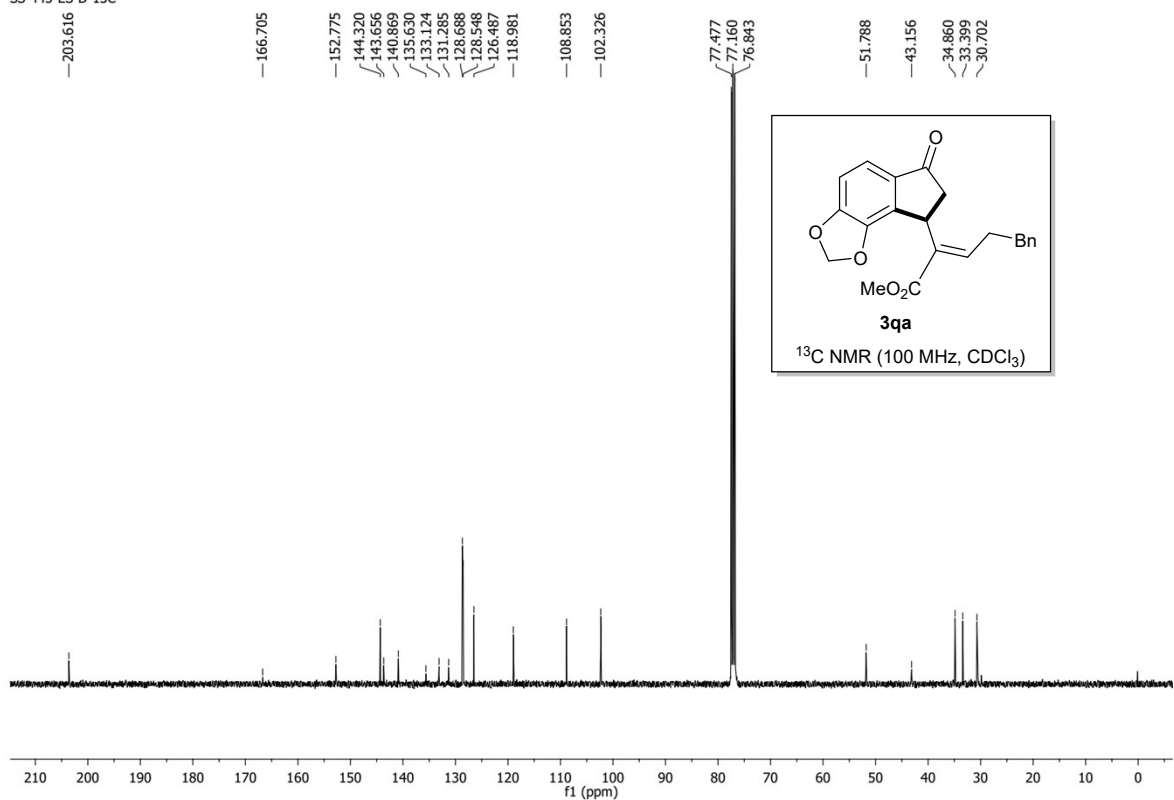



SS-436-ES-D-1H

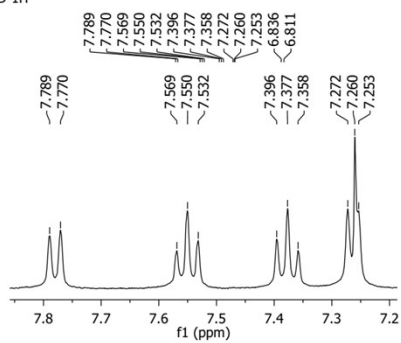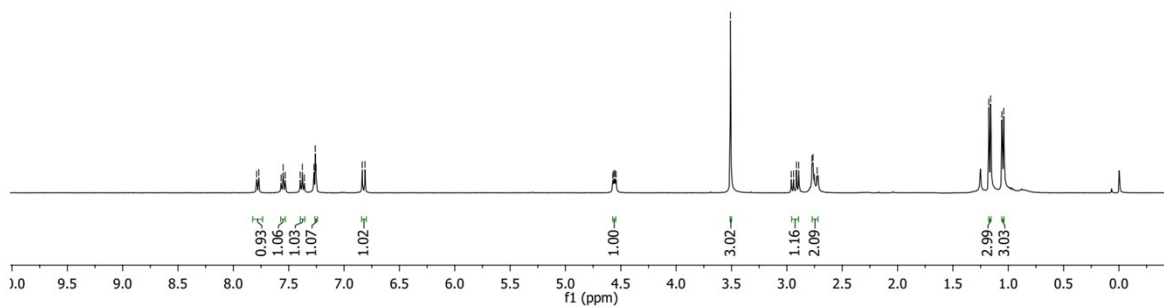

SS-436-ES-D-13C

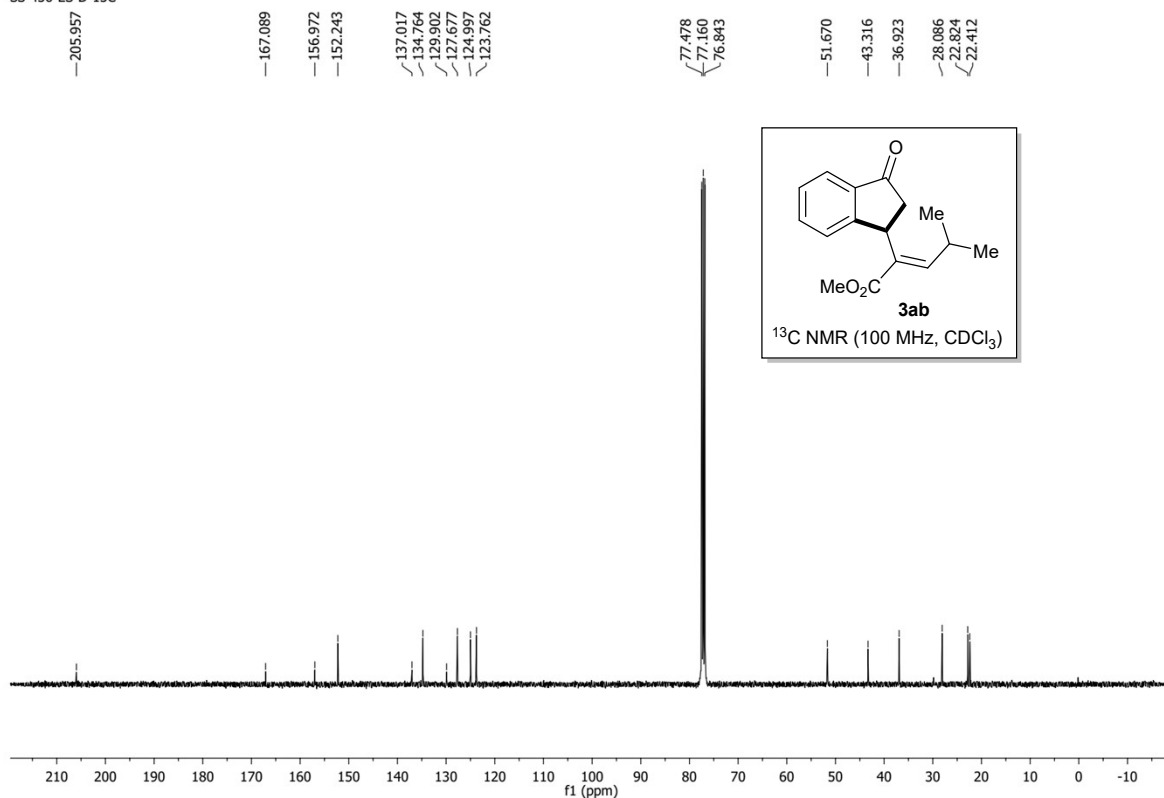

SS-426-ESTER-1H

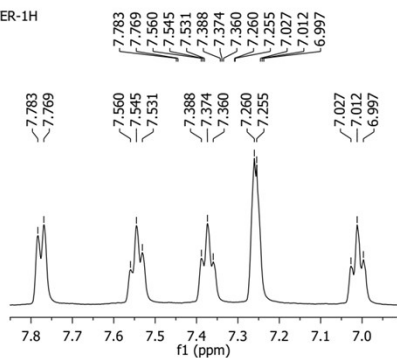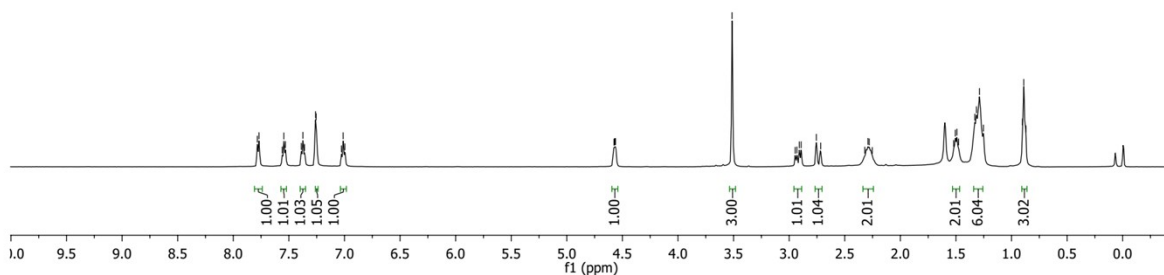

SS-426-ESTER-13C

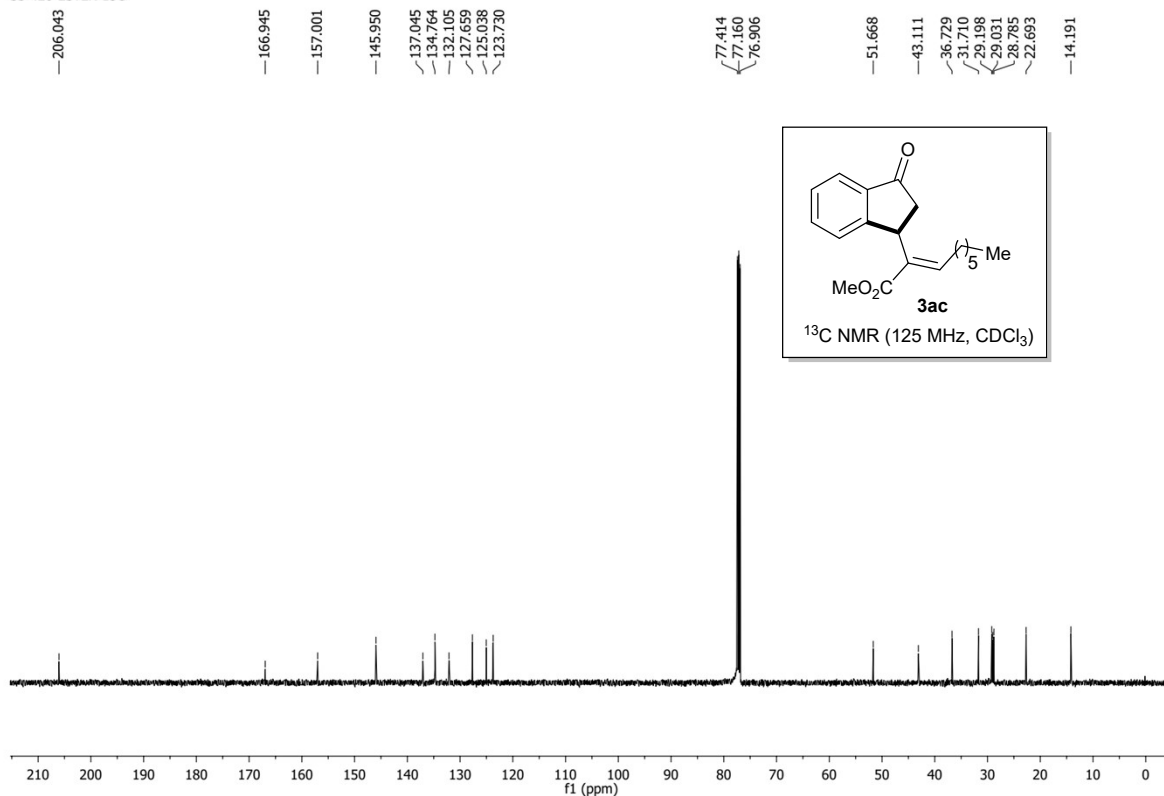

[illegible]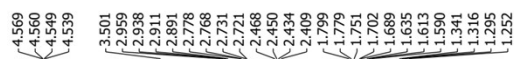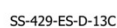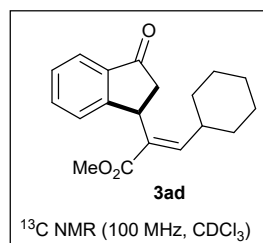

SS-450-ES-D-1H

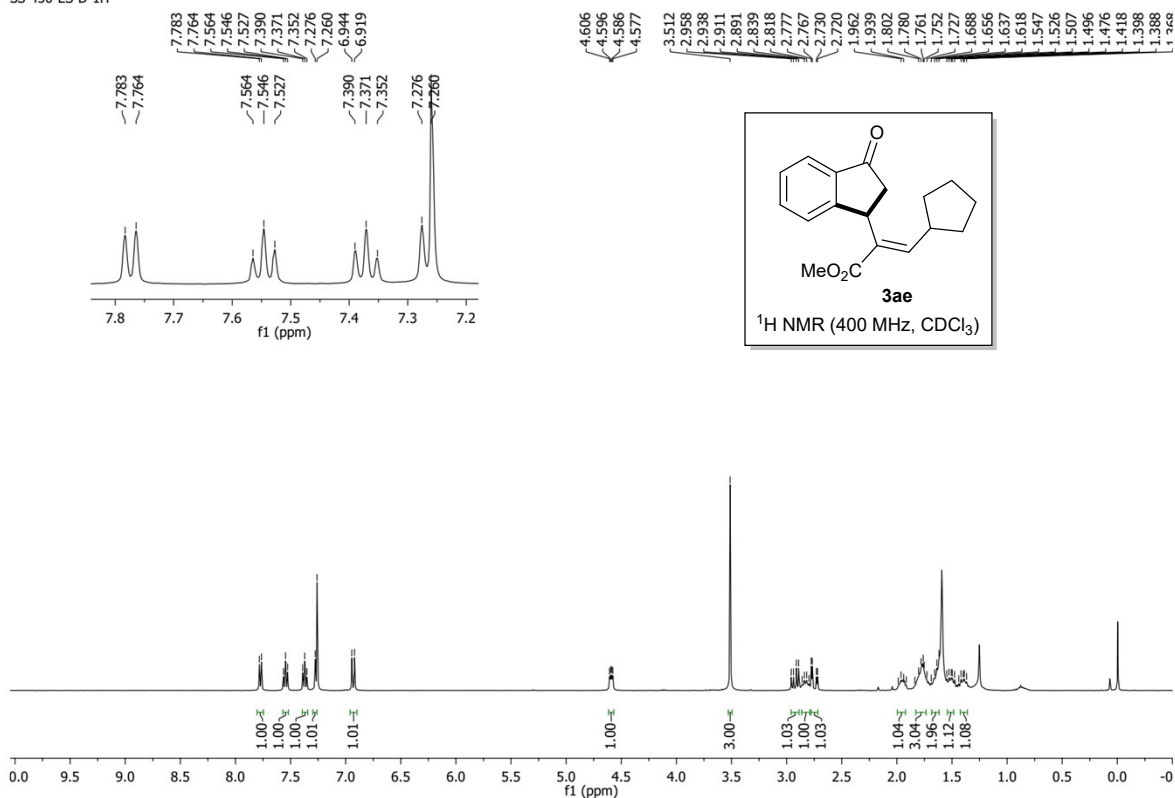

SS-450-ES-D-13C

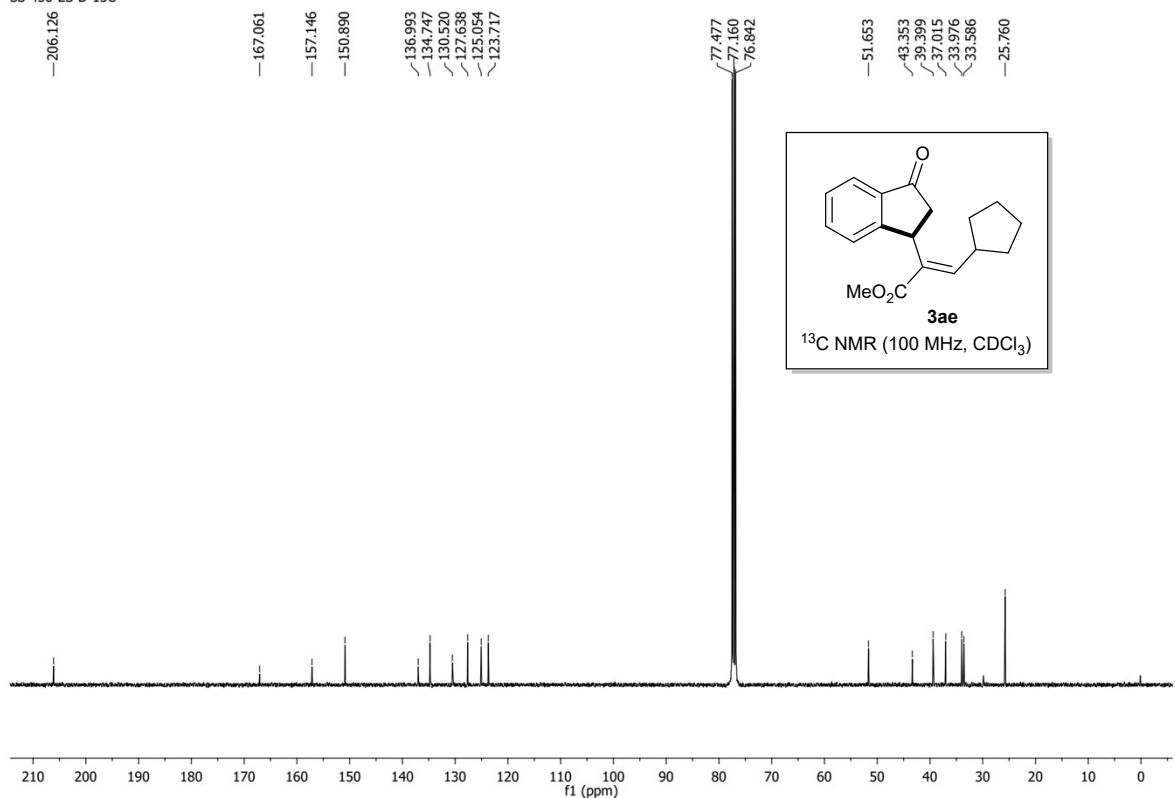

SS-451-ES-D-1H

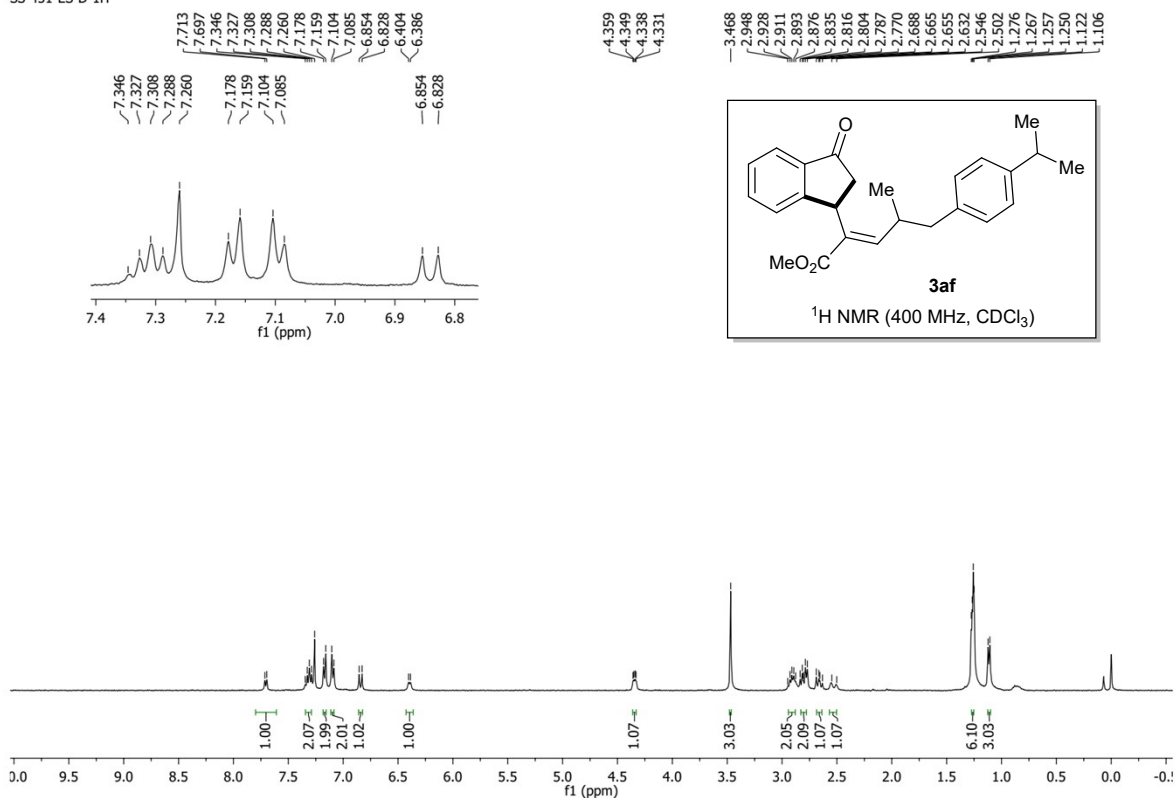

SS-451-ES-D-13C

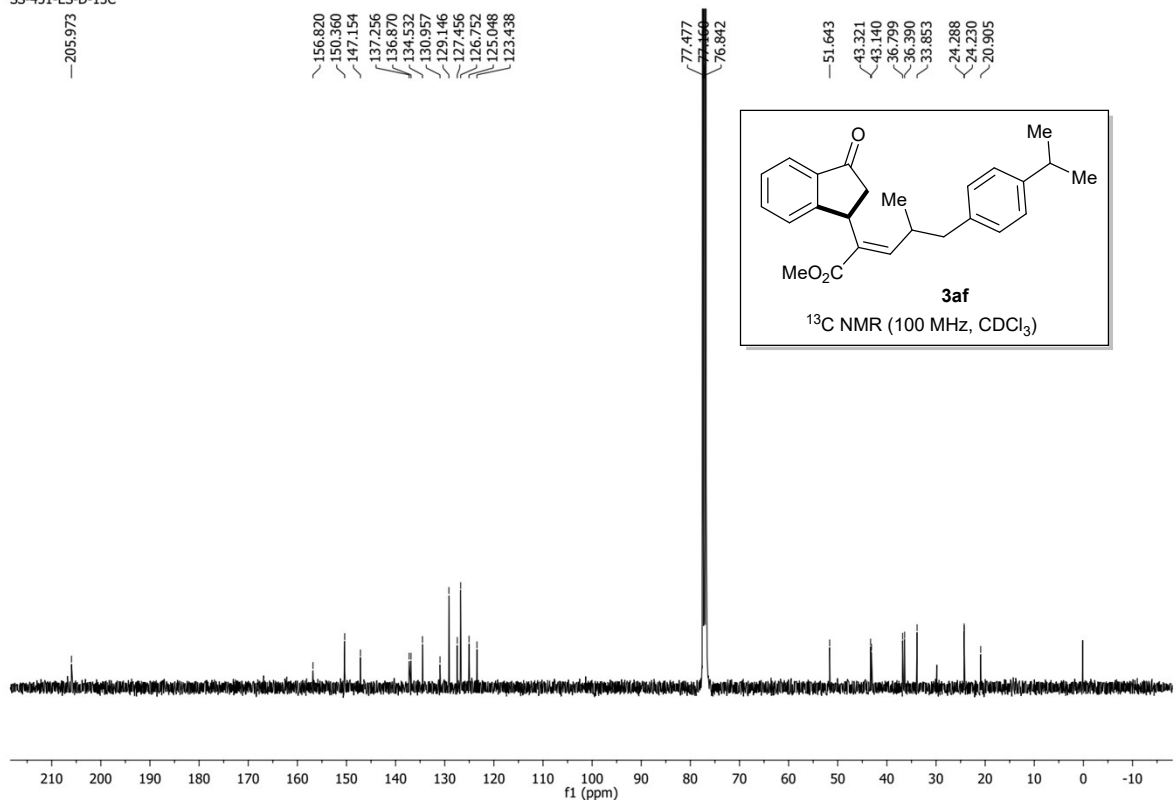

SS-417-ES-T-1H

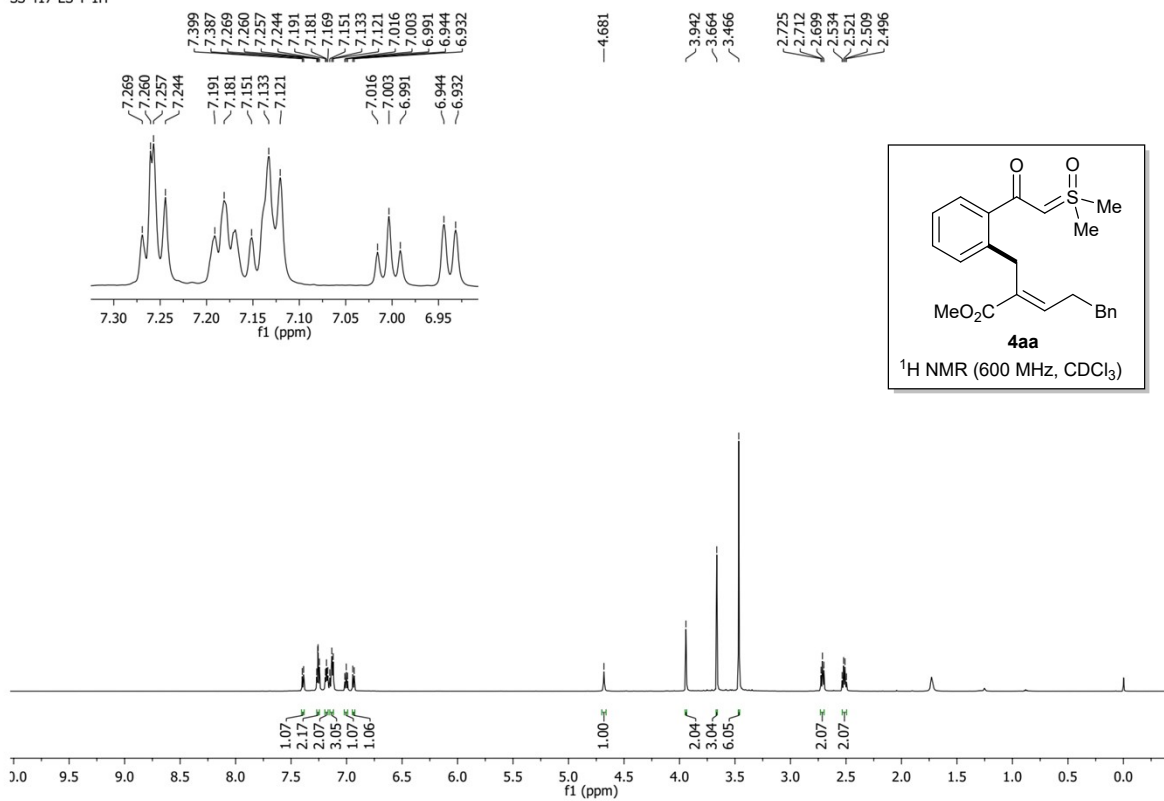

SS-417-ES-T-13C

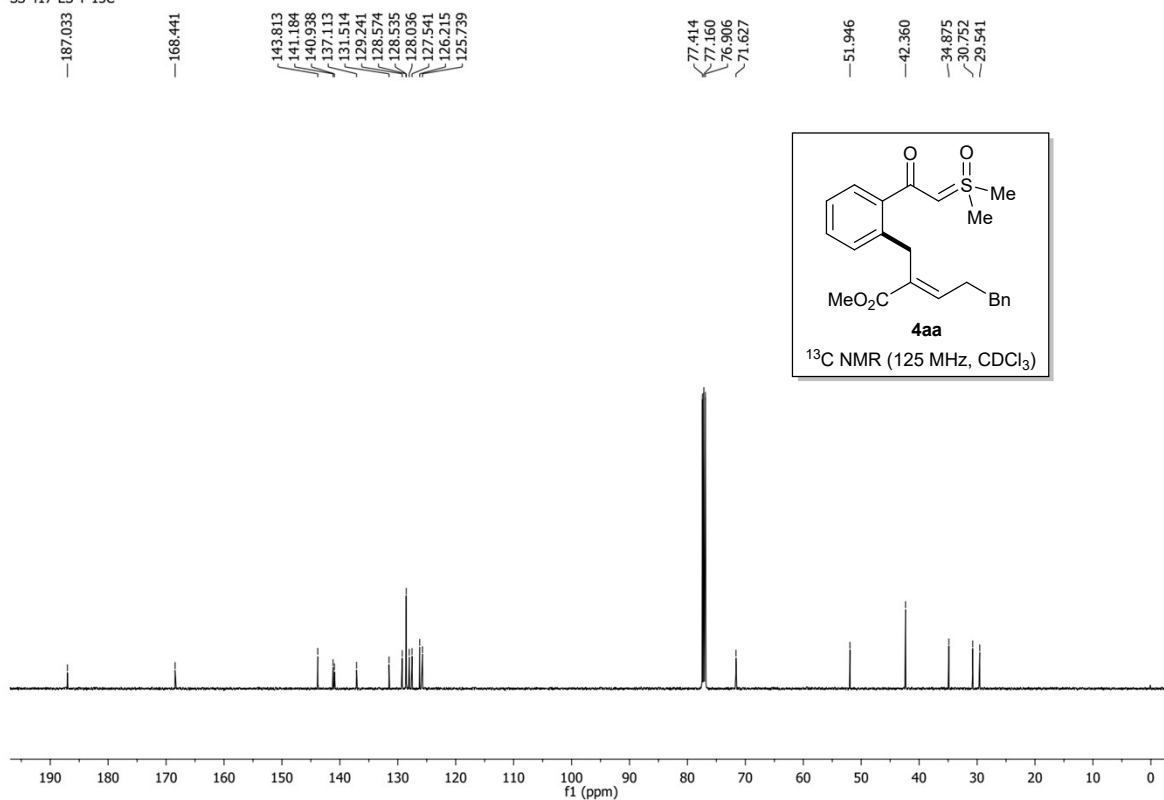

SS-425-ES-T-1H

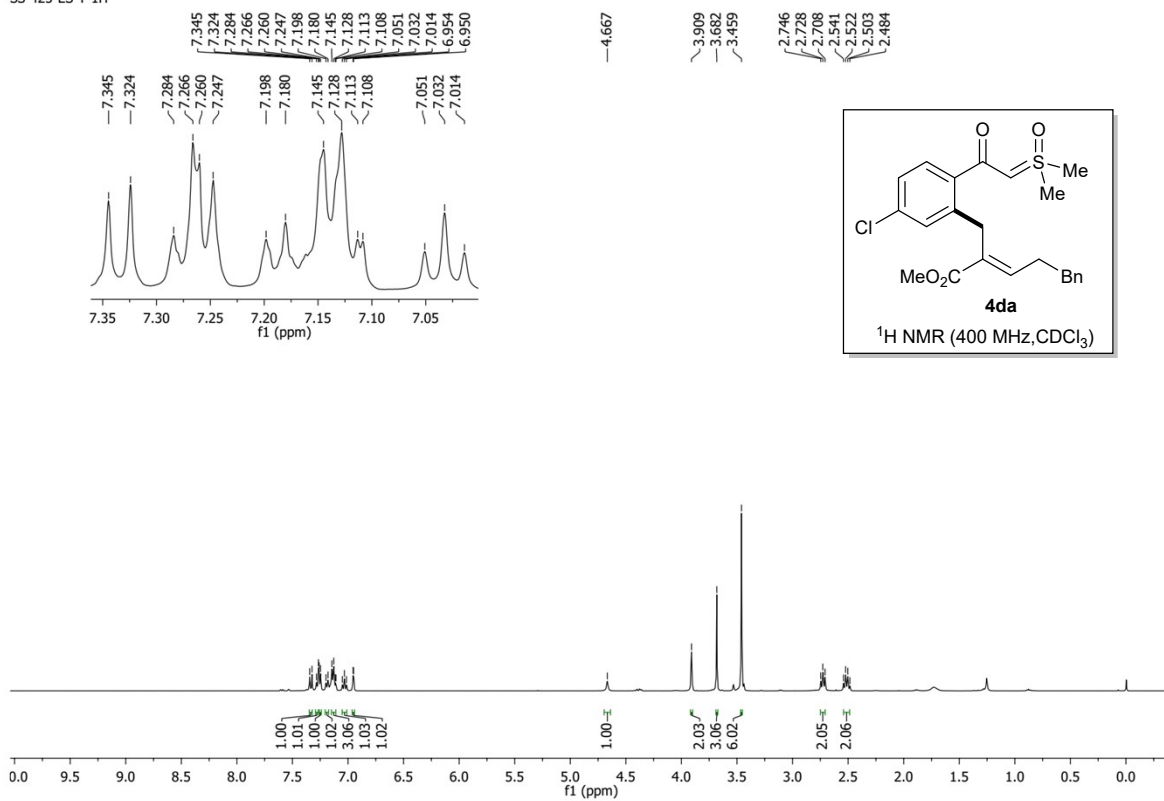

SS-425-ES-T-13C

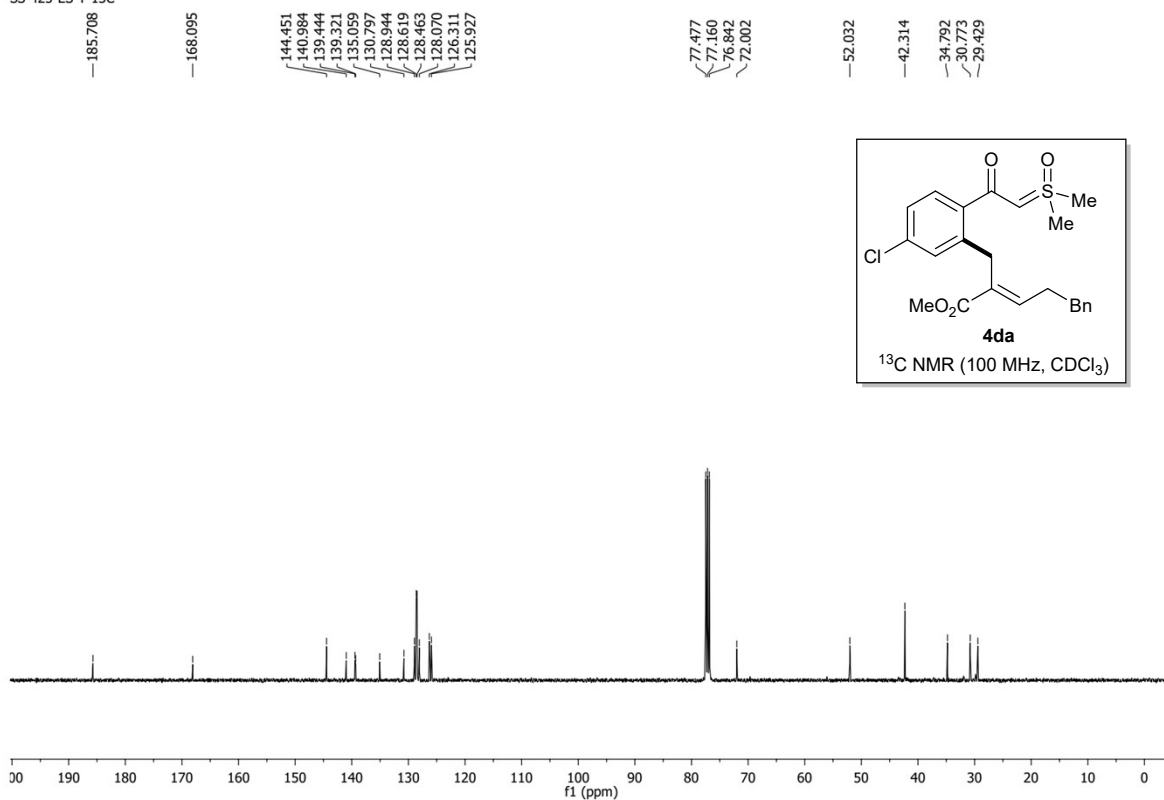

SS-418-ES-T-1H

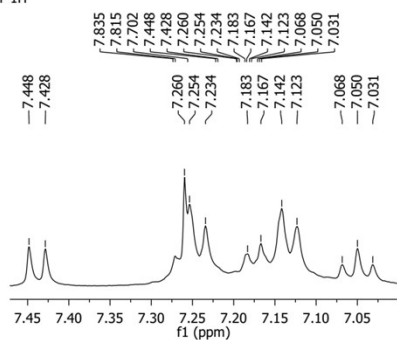

—4.700

3.930  
3.875  
3.669  
3.486

2.755  
2.736  
2.716  
2.557  
2.538  
2.519  
2.500

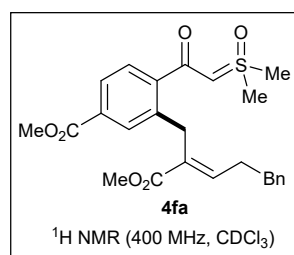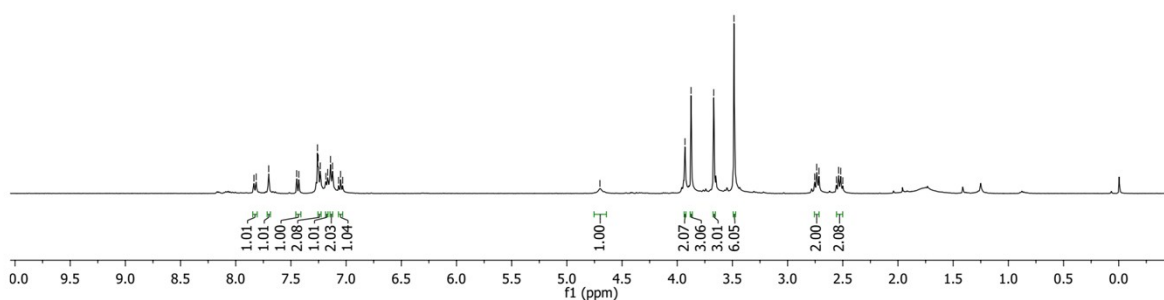

SS-418-ES-T-13C

185.825  
168.223  
166.912  
145.371  
144.251  
141.153  
137.514  
131.018  
130.649  
129.435  
128.606  
128.515  
127.540  
127.264  
126.253

77.477  
77.160  
76.843  
72.325

52.186  
51.924  
42.504  
34.868  
30.876  
29.591

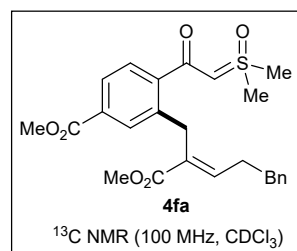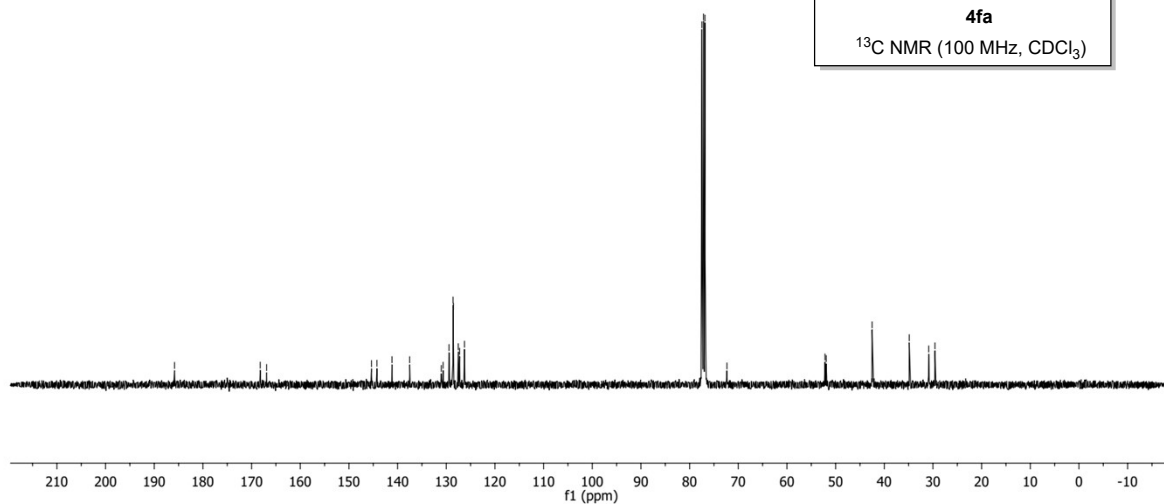



SS-420-ES-T-1H

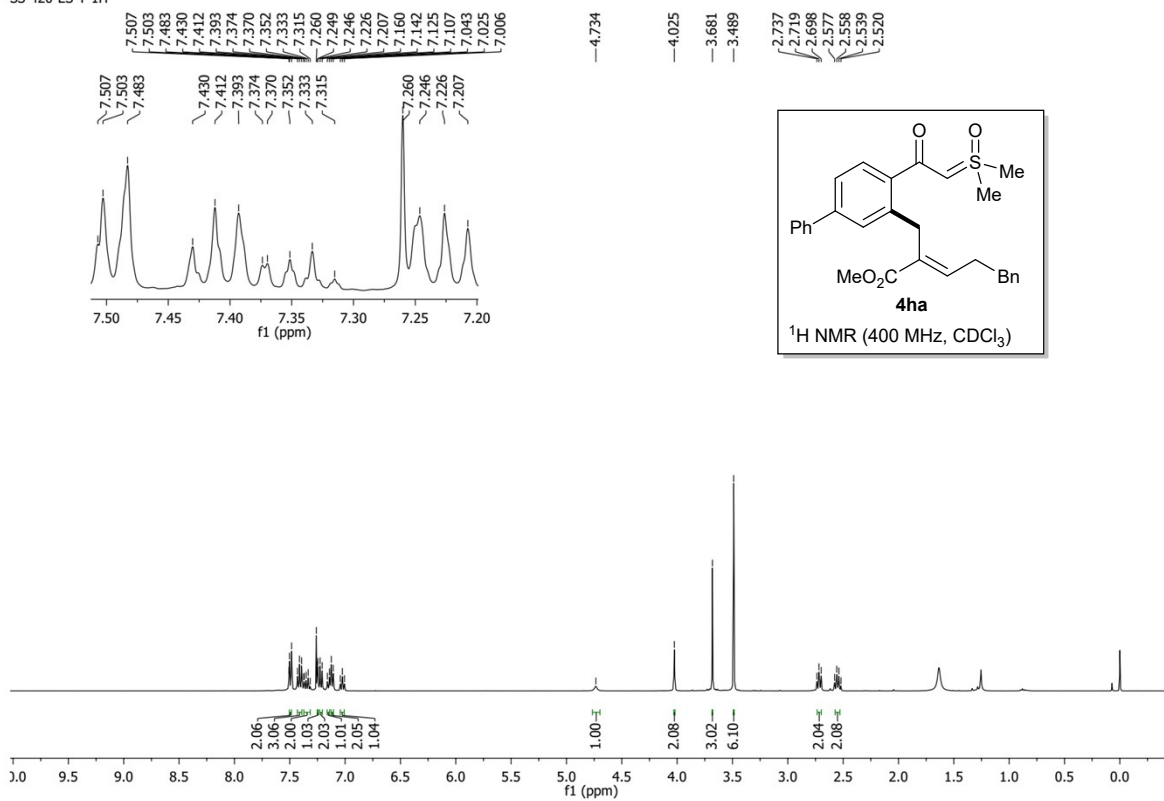

SS-420-ES-T-13C

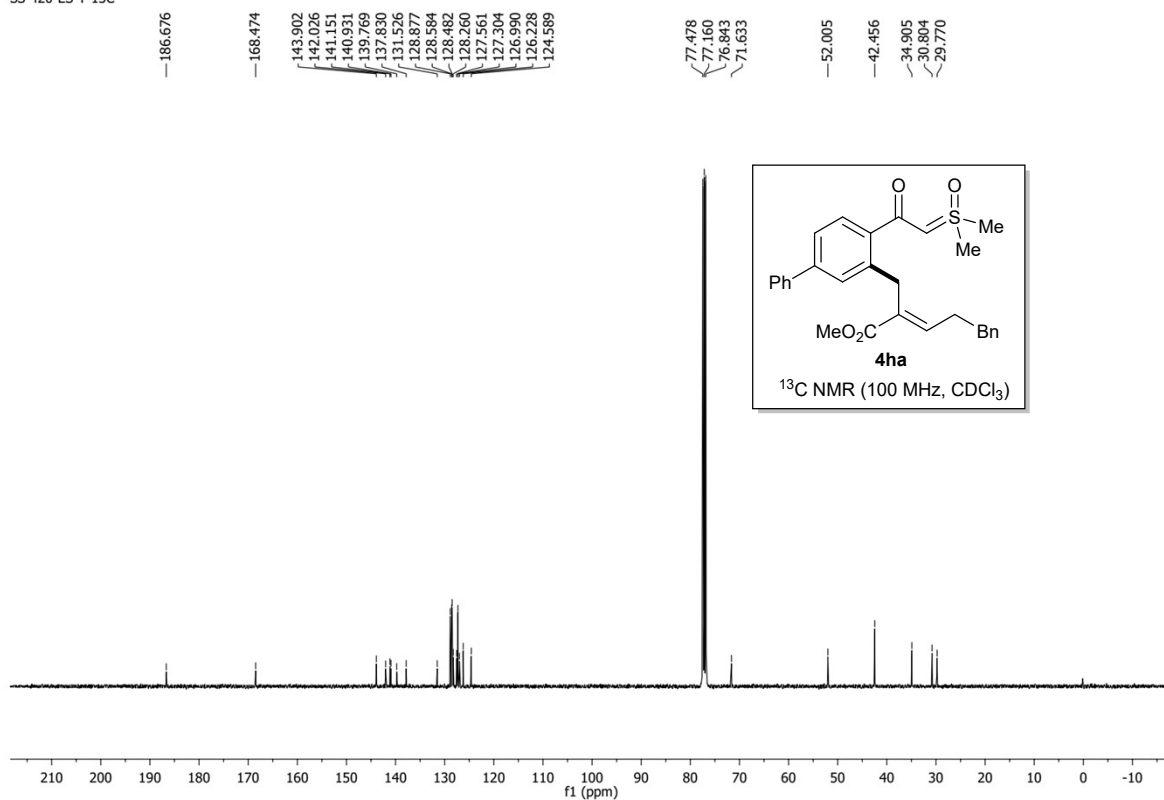

SS-427-ES-T-1H

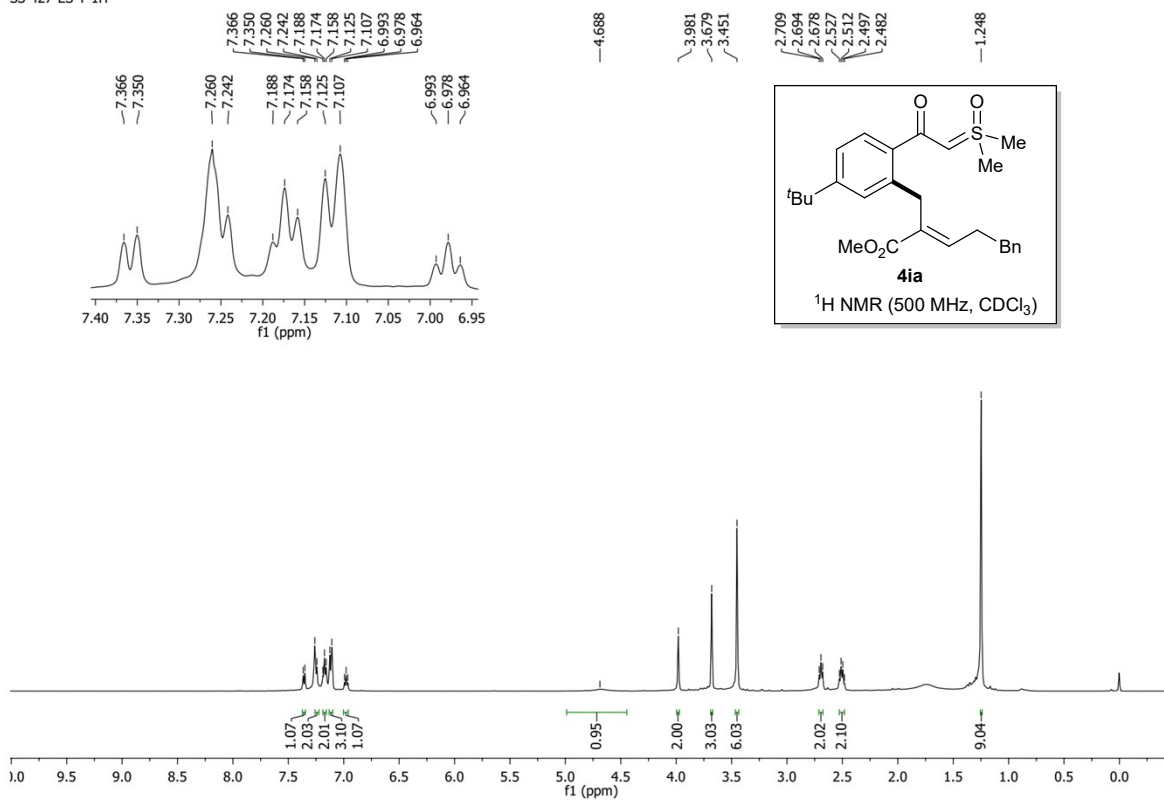

SS-427-ES-T-13C

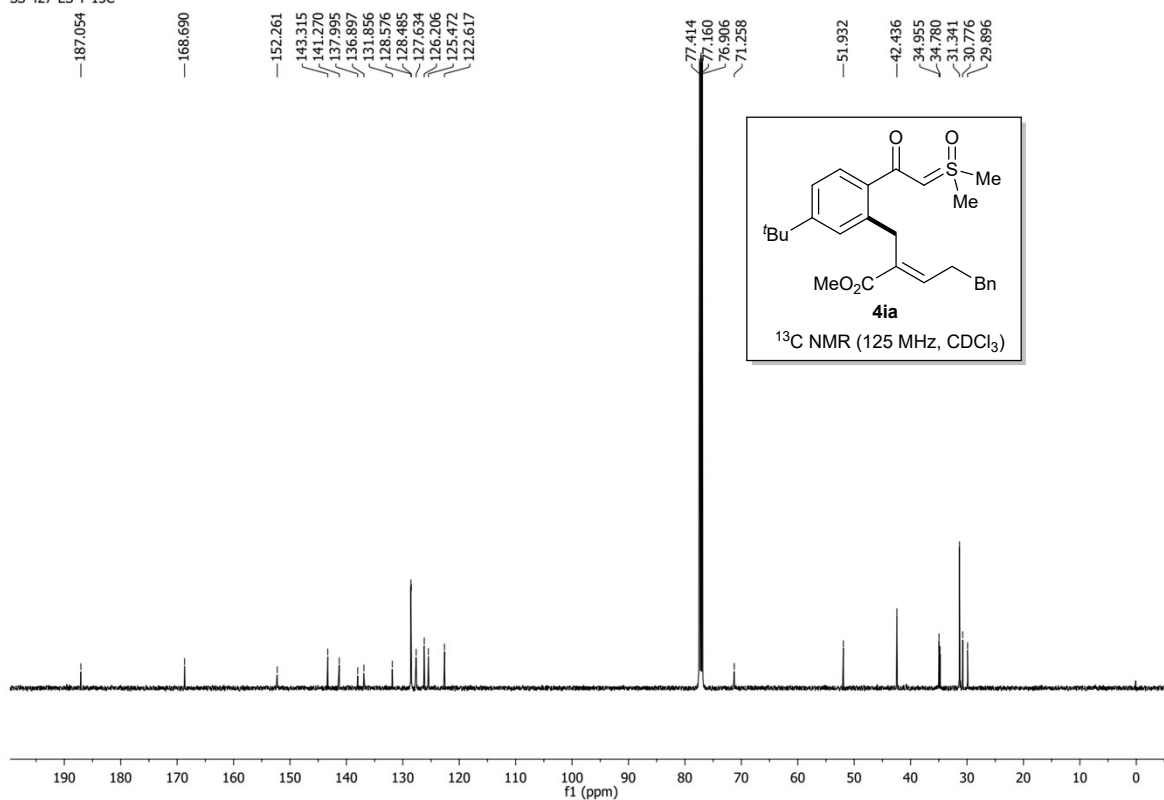

SS-430-ES-T-1H

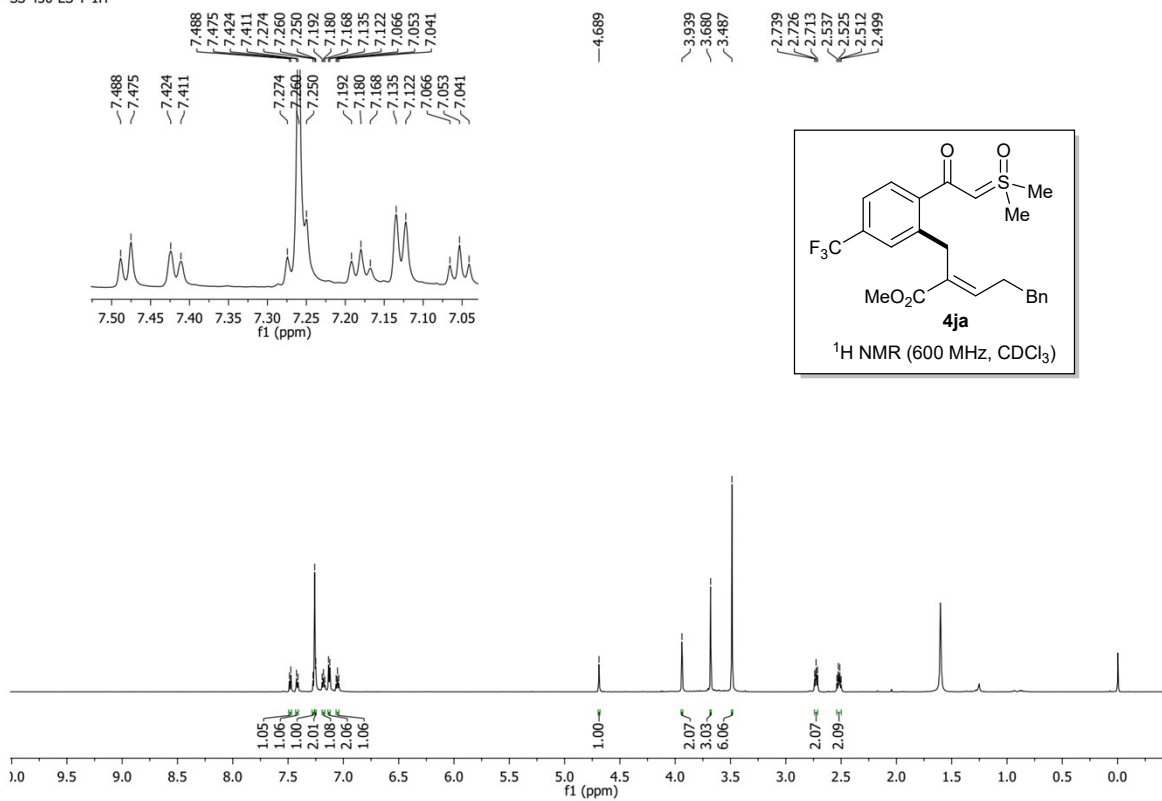

SS-430-ES-T-13C

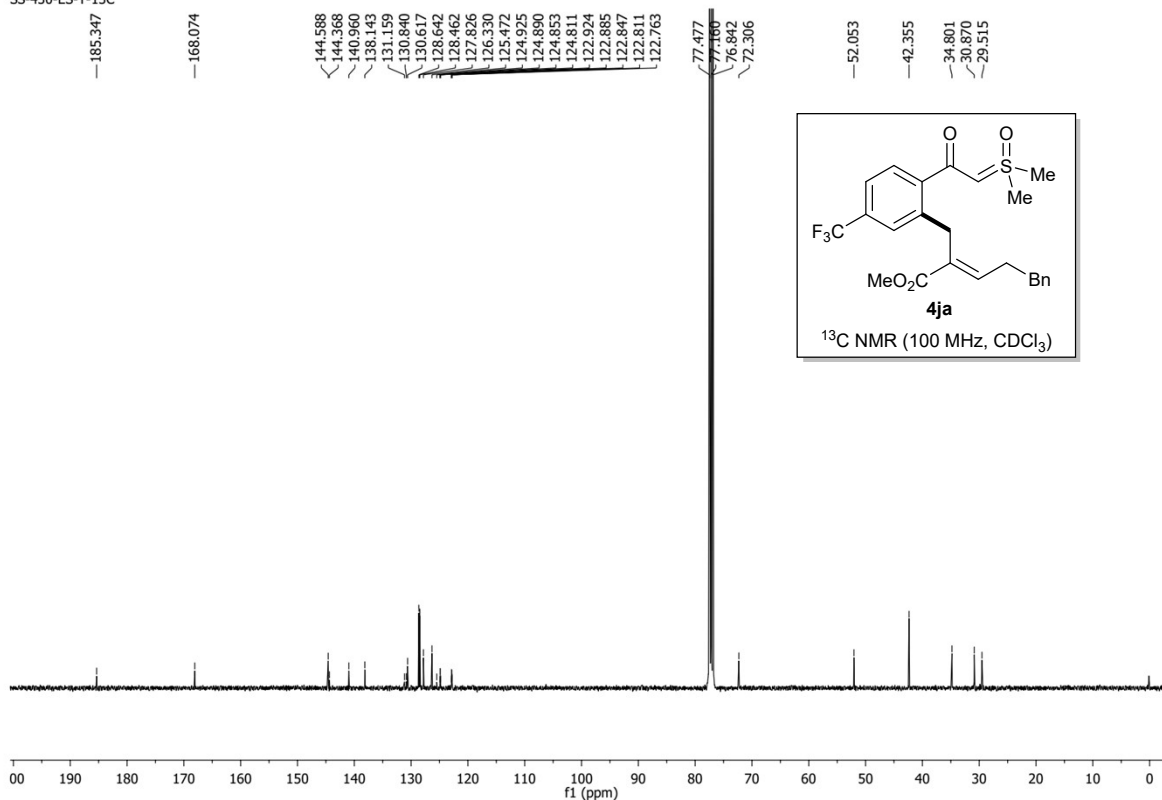

SS-430-ES-T-19F

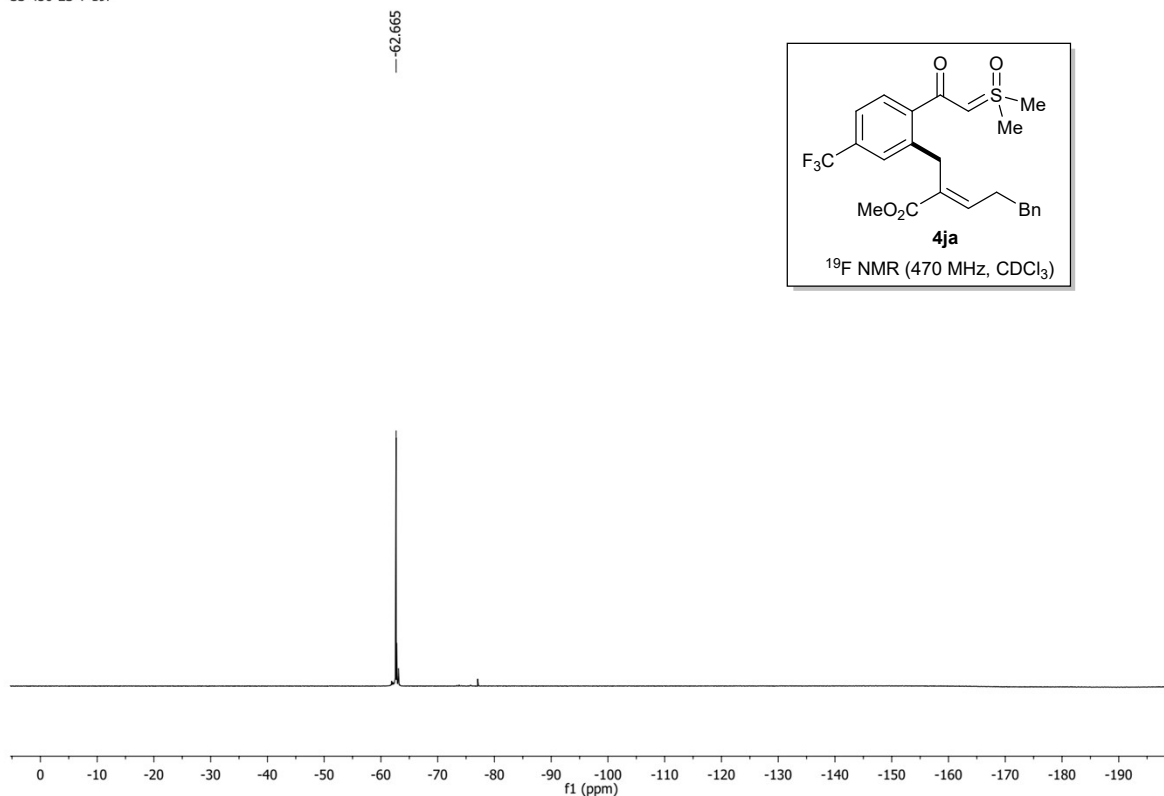

SS-419-ES-T-1H

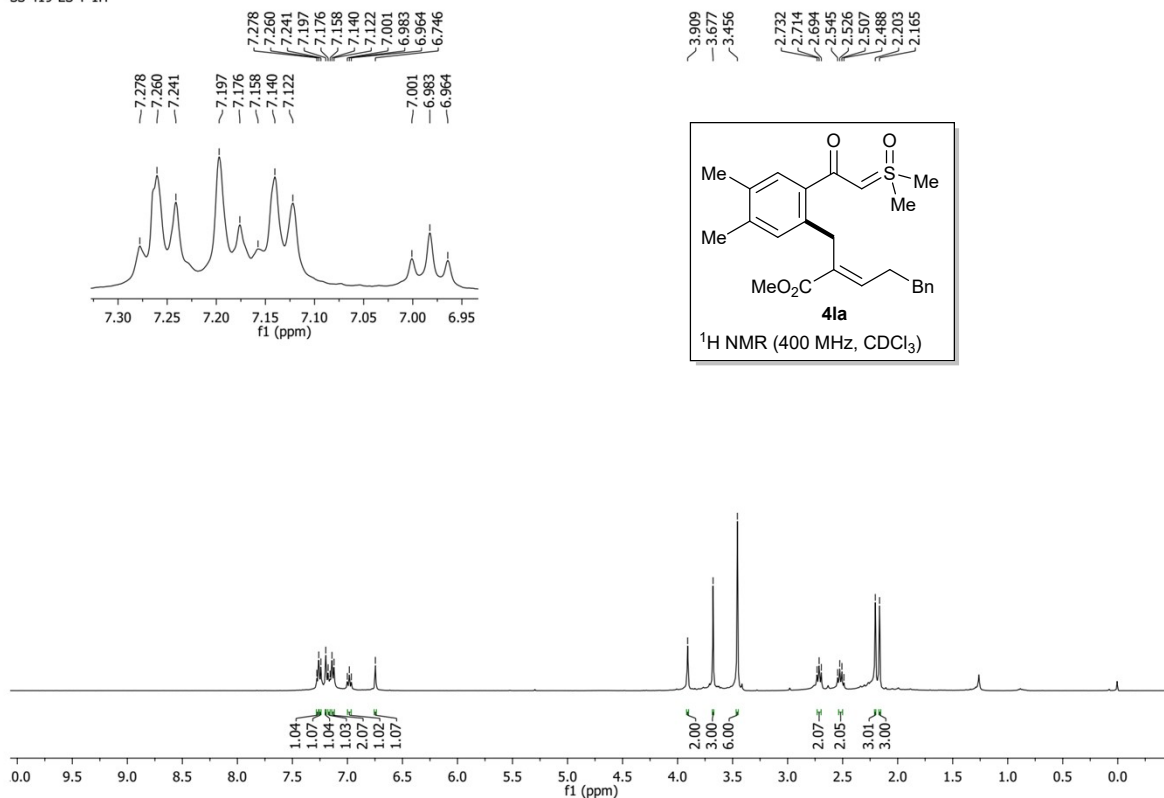

SS-419-ES-T-13C

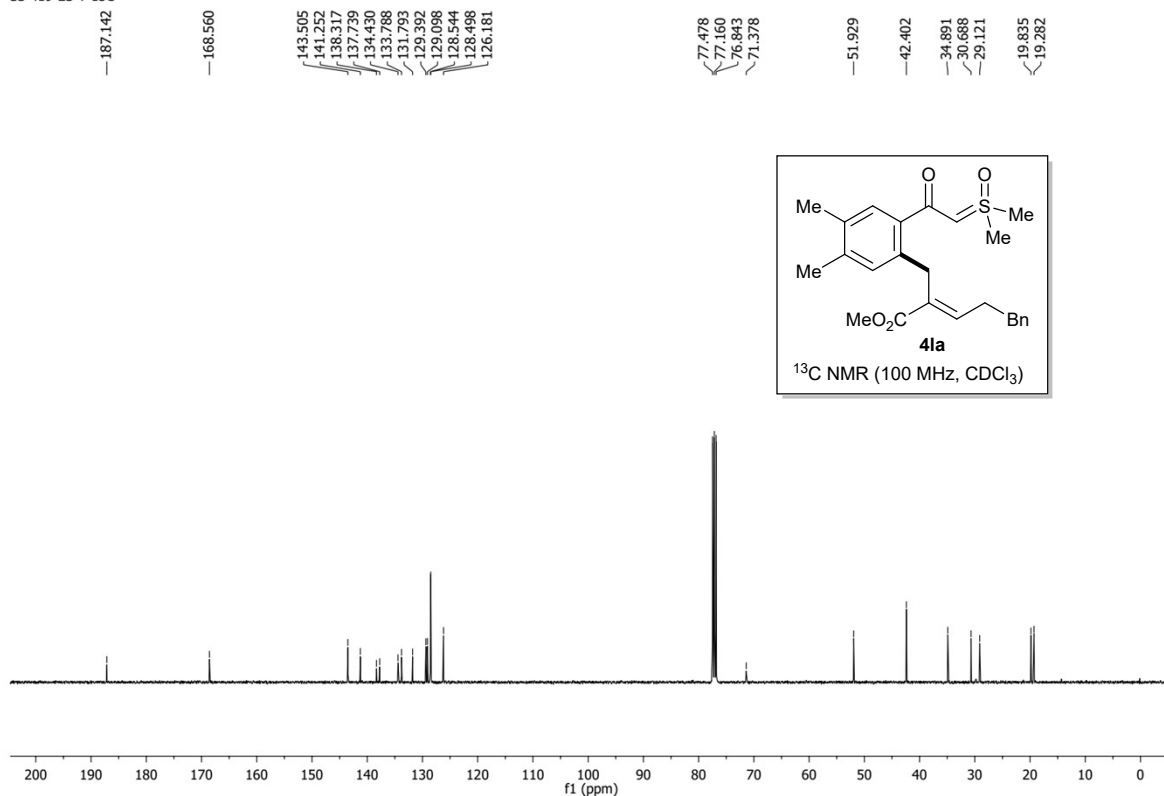

SS-428-ES-T-1H

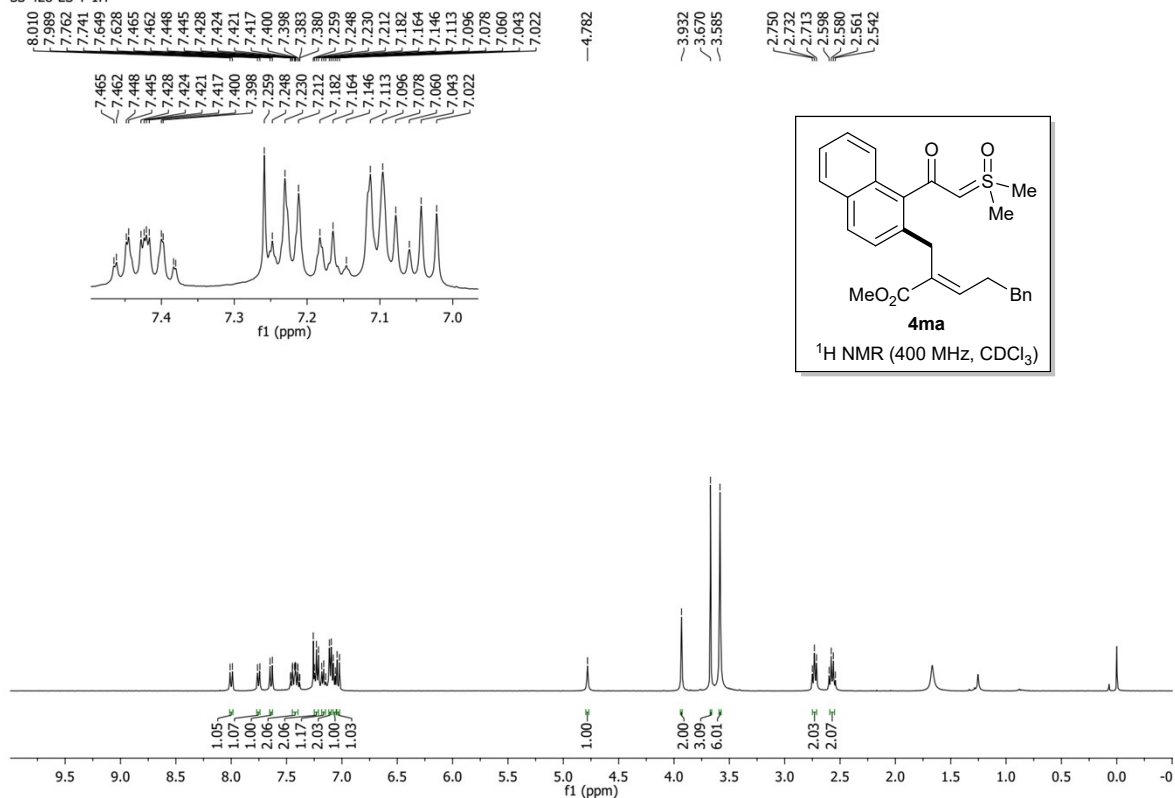



Chemical structure of **4pa** is shown in the inset. The structure is a benzene ring substituted with a  $(^n\text{Pr})_2\text{N}-\text{SO}_2$  group, a  $\text{MeO}_2\text{C}$  group, a  $-\text{CH}(\text{CH}_2\text{CH}_2\text{Bn})$  group, and a  $-\text{C}(=\text{O})-\text{CH}=\text{CH}-\text{S}(=\text{O})_2\text{Me}$  group.

$^{13}\text{C}$  NMR (100 MHz,  $\text{CDCl}_3$ ) peaks (ppm):

- 185.090
- 167.938
- 144.675
- 144.610
- 140.947
- 140.334
- 138.543
- 130.539
- 128.656
- 128.483
- 128.046
- 126.648
- 126.327
- 124.666
- 77.478
- 76.843
- 72.614
- 51.997
- 50.191
- 42.320
- 34.833
- 30.907
- 29.650
- 22.146
- 11.302

**4ra**  
<sup>1</sup>H NMR (400 MHz, CDCl<sub>3</sub>)

Chemical structure of **4ra** is shown in the inset. The structure features a naphthalene core substituted with a 4-methoxyphenyl group, a 1-methyl-2-(benzyloxymethyl)-2-sulfonyl-1-oxoethyl group, and a 1-methyl-2-(benzyloxymethyl)-2-sulfonyl-1-oxoethyl group.

The <sup>1</sup>H NMR spectrum (400 MHz, CDCl<sub>3</sub>) shows peaks in the aromatic region (6.75–7.20 ppm) and aliphatic region (1.0–4.5 ppm). The inset provides a detailed view of the aromatic region with peak assignments and integrations.

Peak assignments (ppm) from the inset:

- 7.180, 7.163, 7.144, 7.122, 7.104, 7.088
- 6.996, 6.975
- 6.845, 6.828, 6.811, 6.792, 6.774

Integration values from the inset:

- 1.02, 1.04, 1.03, 1.08, 1.03, 2.09, 2.03, 1.10, 1.03, 2.02, 1.05

Peak assignments (ppm) from the main spectrum:

- 4.546, 4.458
- 3.897, 3.705, 3.482
- 2.376, 2.358, 2.338, 2.209, 2.187, 2.183, 2.157, 2.099, 1.802

SS-474-ES-T-13C

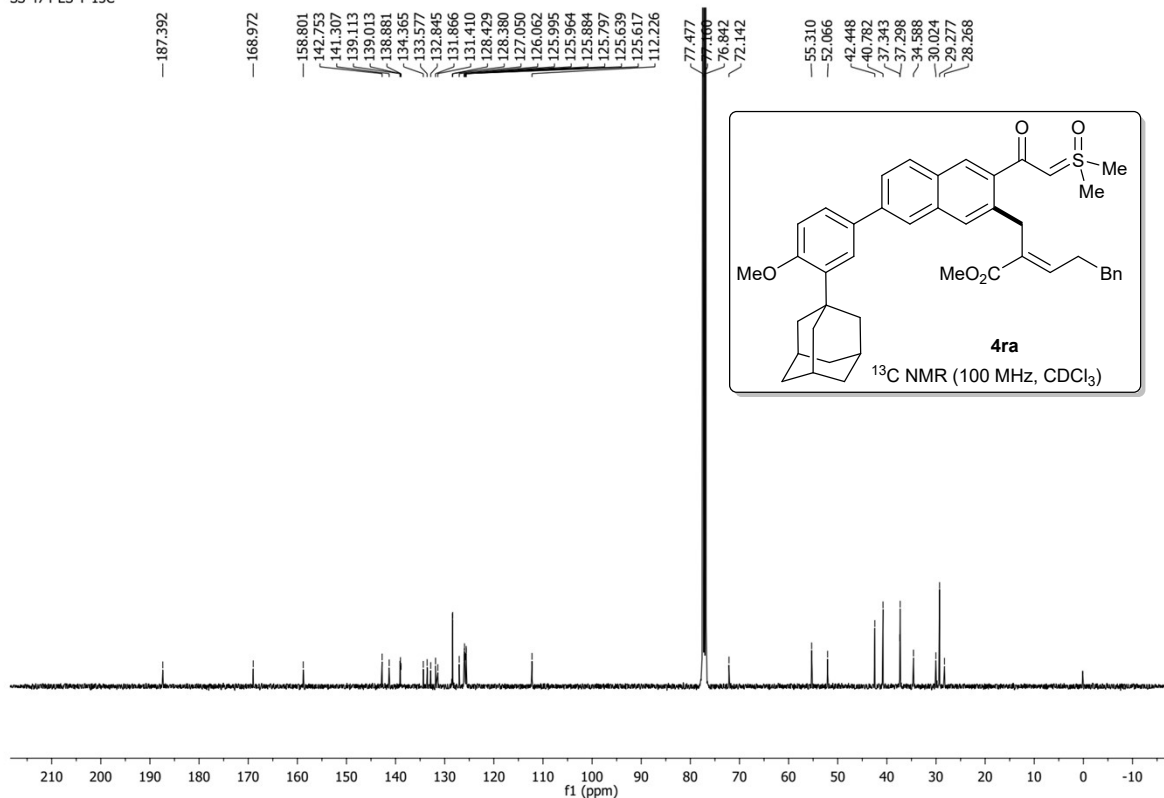

SS-426-ES-T-1H

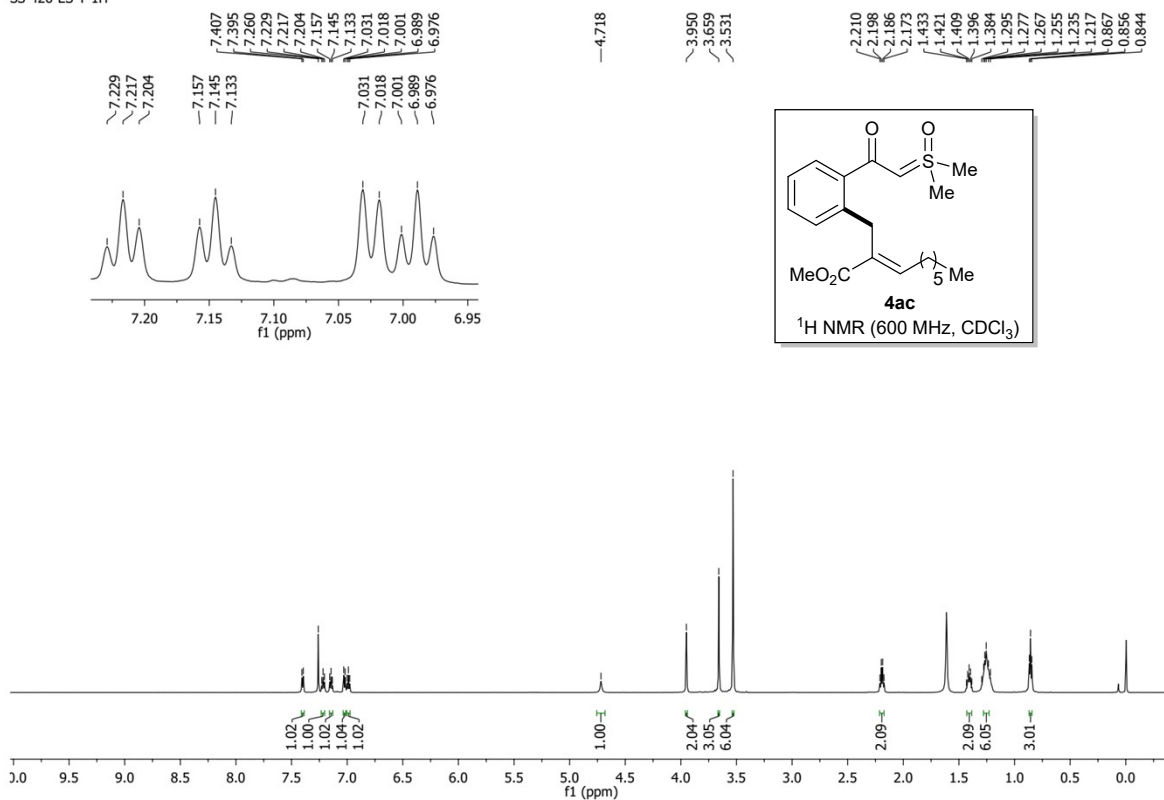



SS-426-ES-T-13C

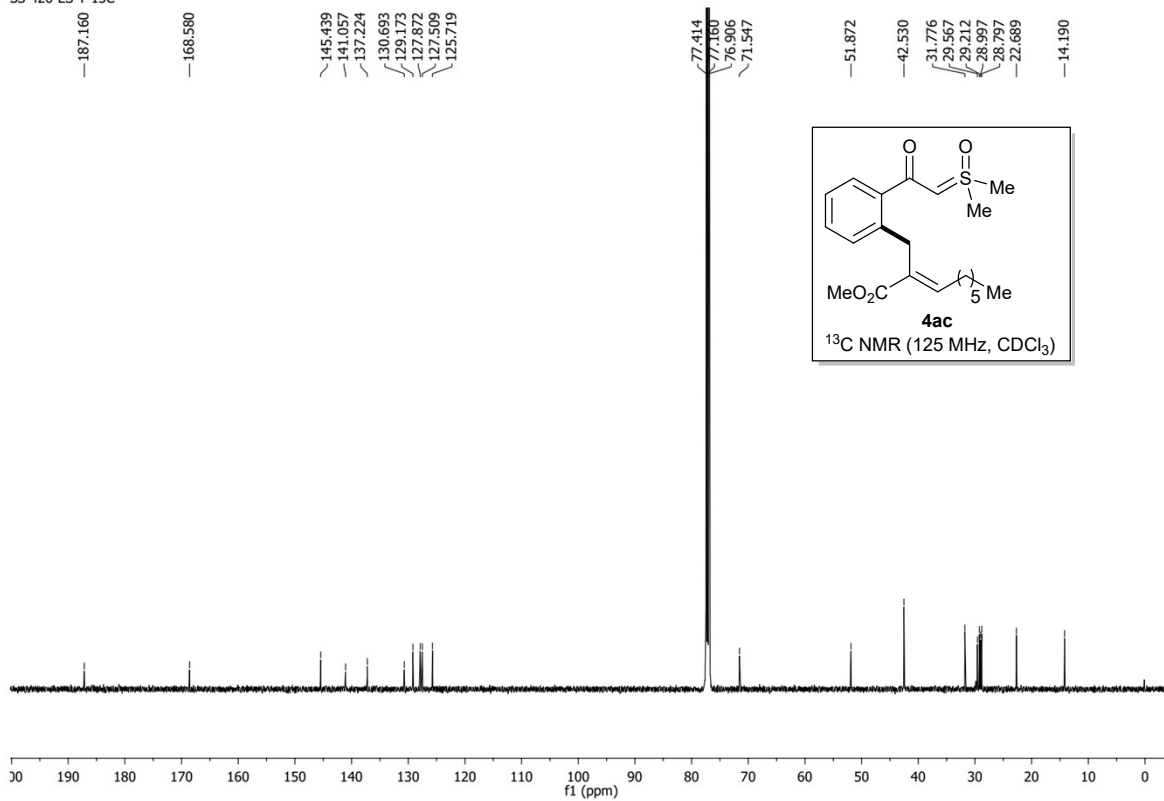

SS-429-ES-T-1H-AC

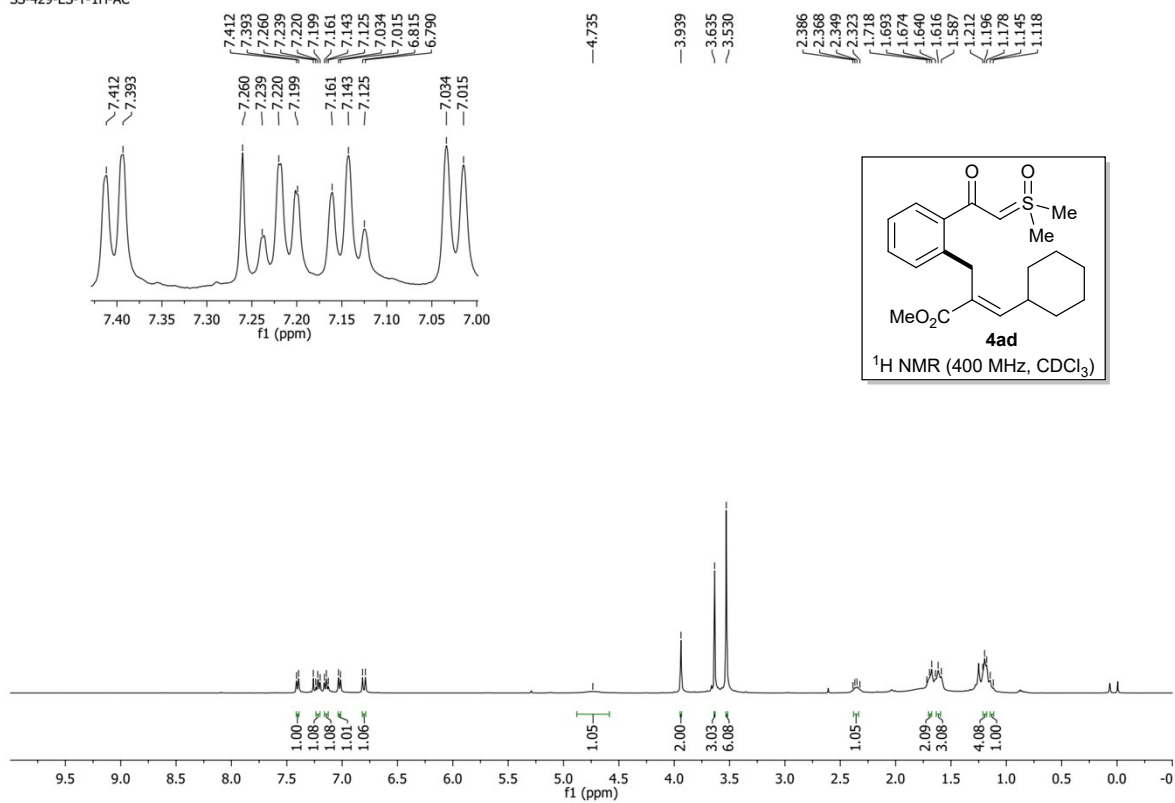

SS-429-ES-T-13C

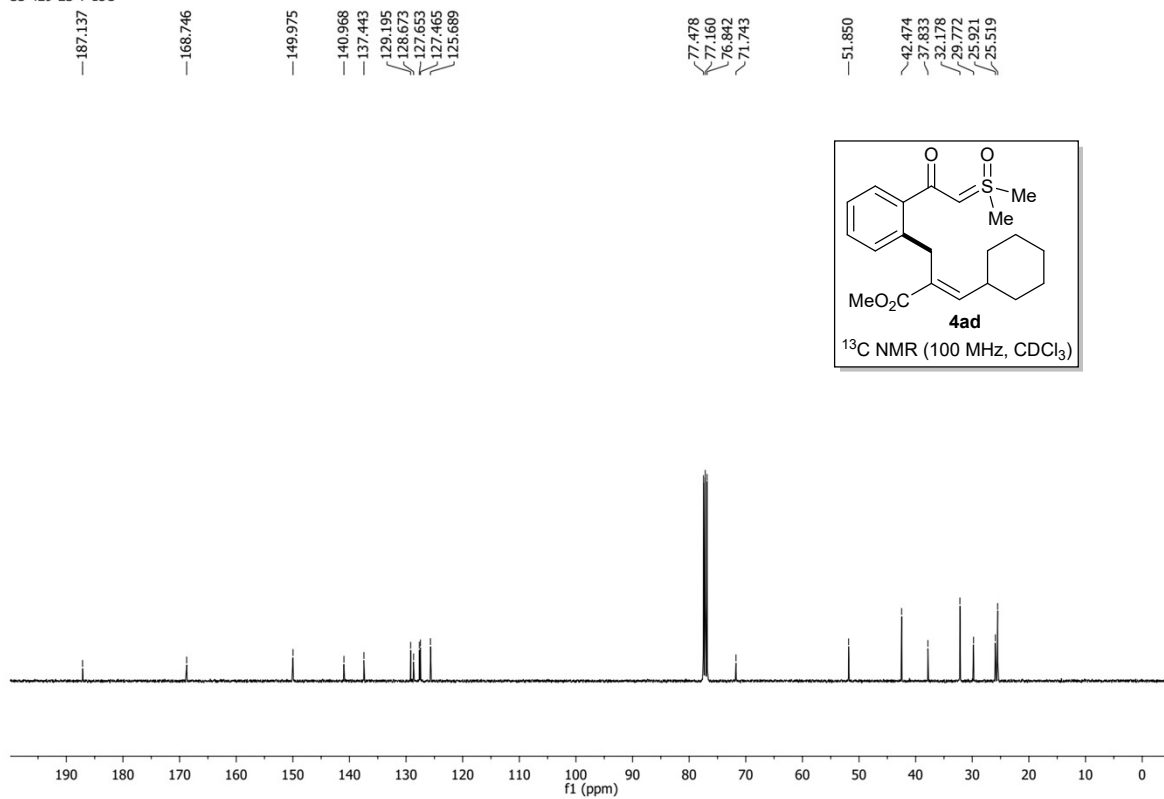

SS-450-ES-T-1H

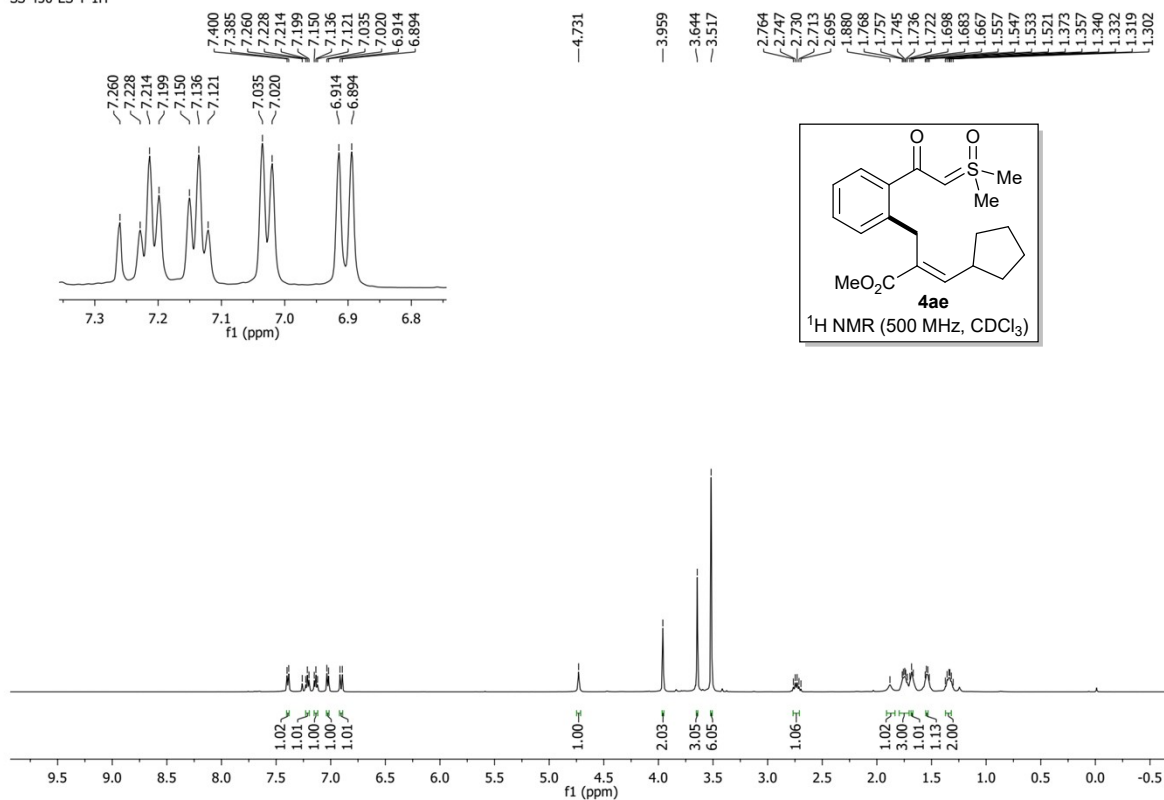

SS-450-ES-T-13C

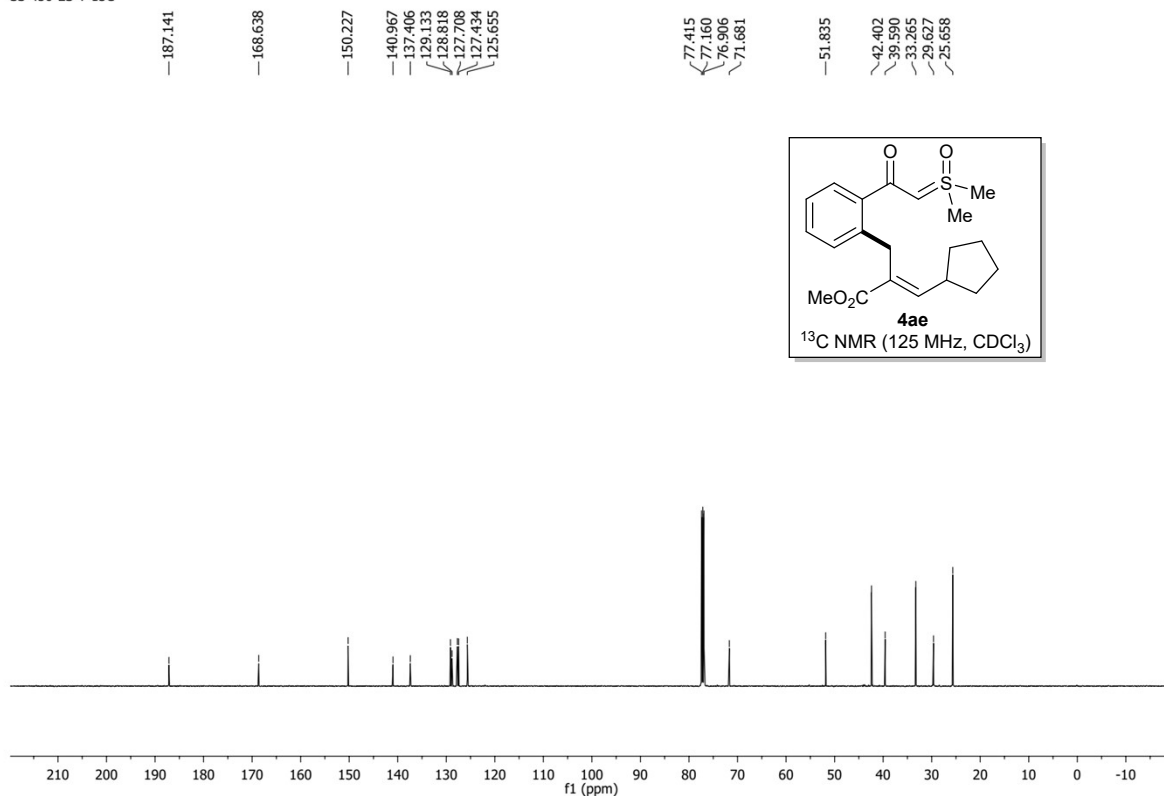

SS-450-D-1H

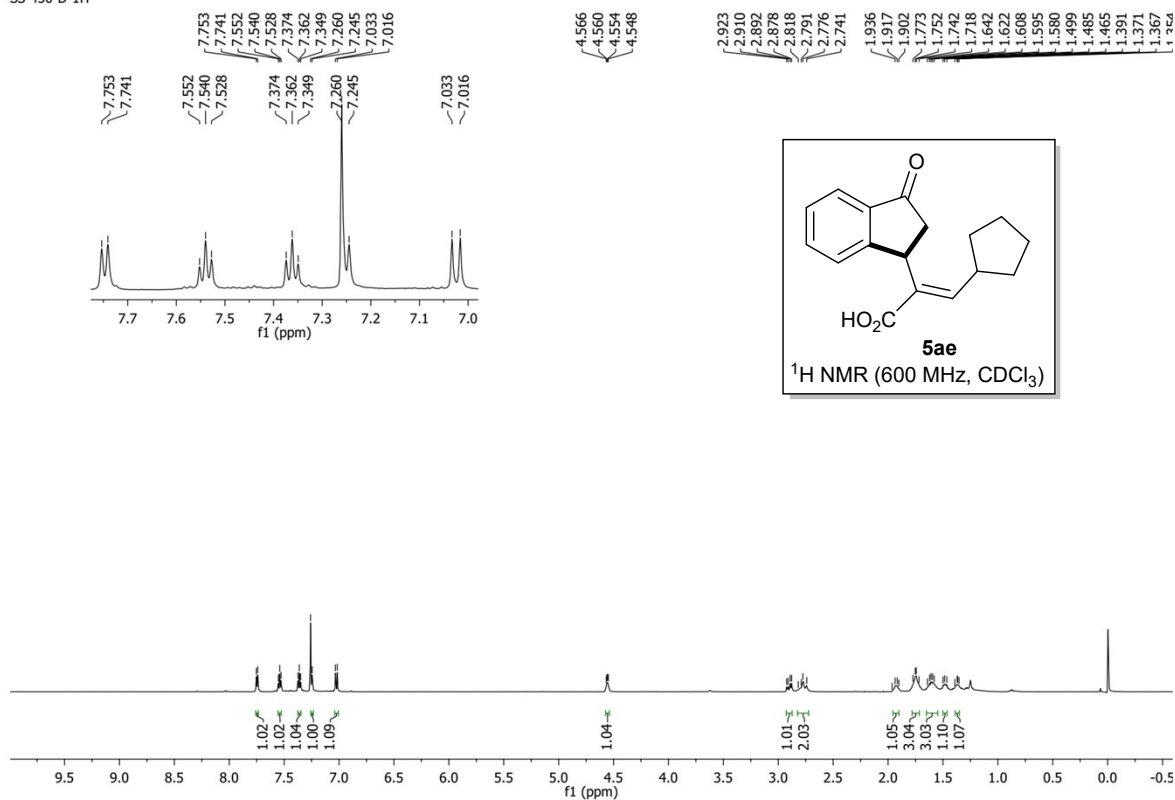

SS-450-D-13C

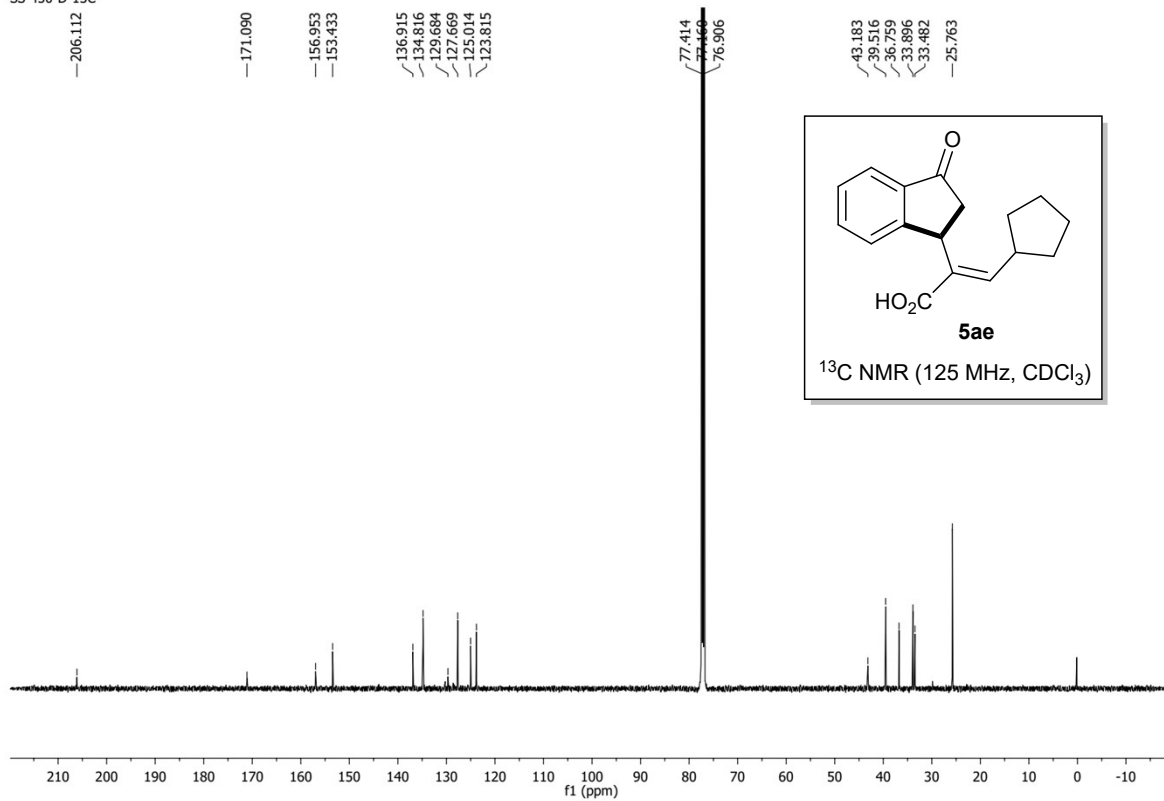

SS-427-1H

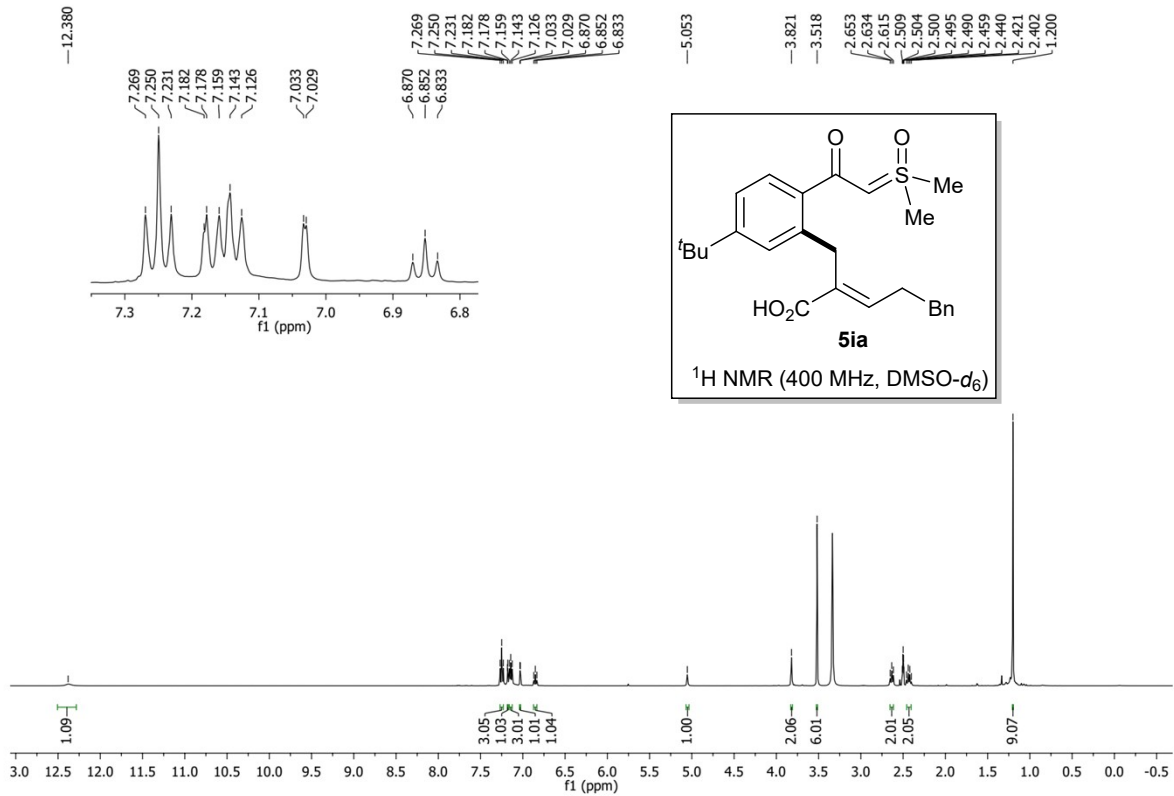

SS-427-13C

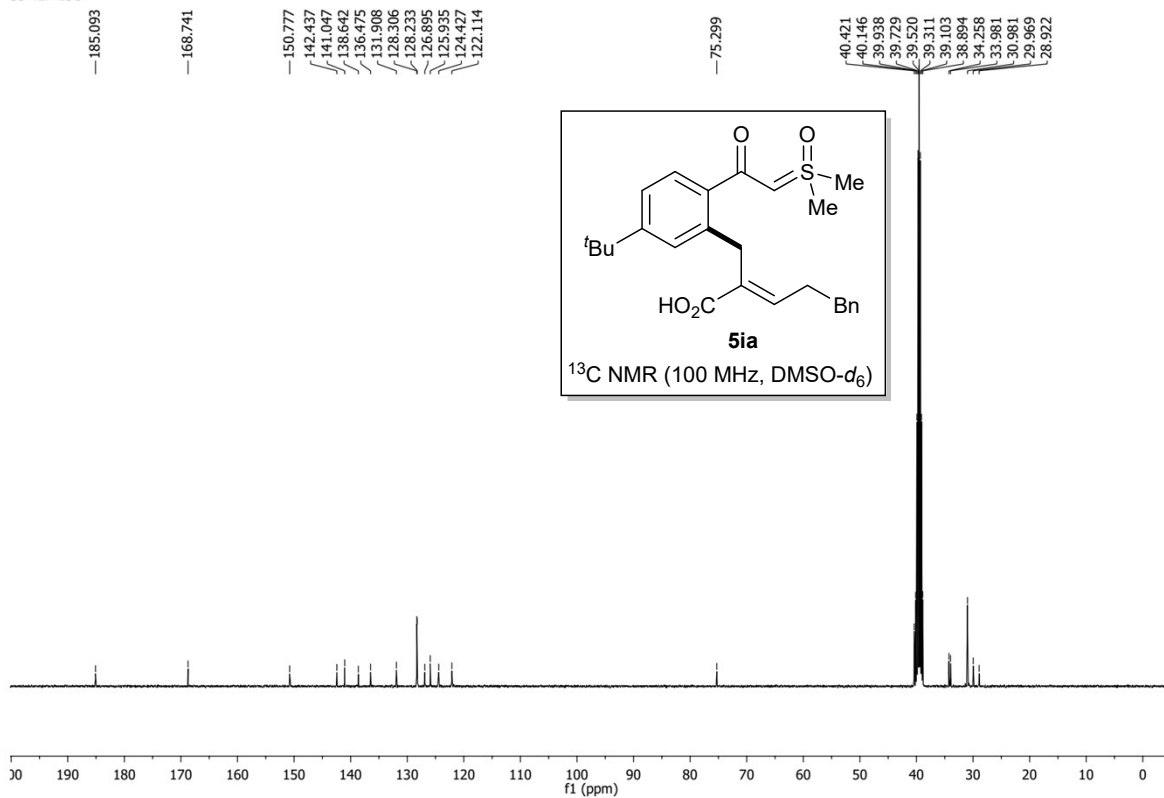

SS-452-D-1H

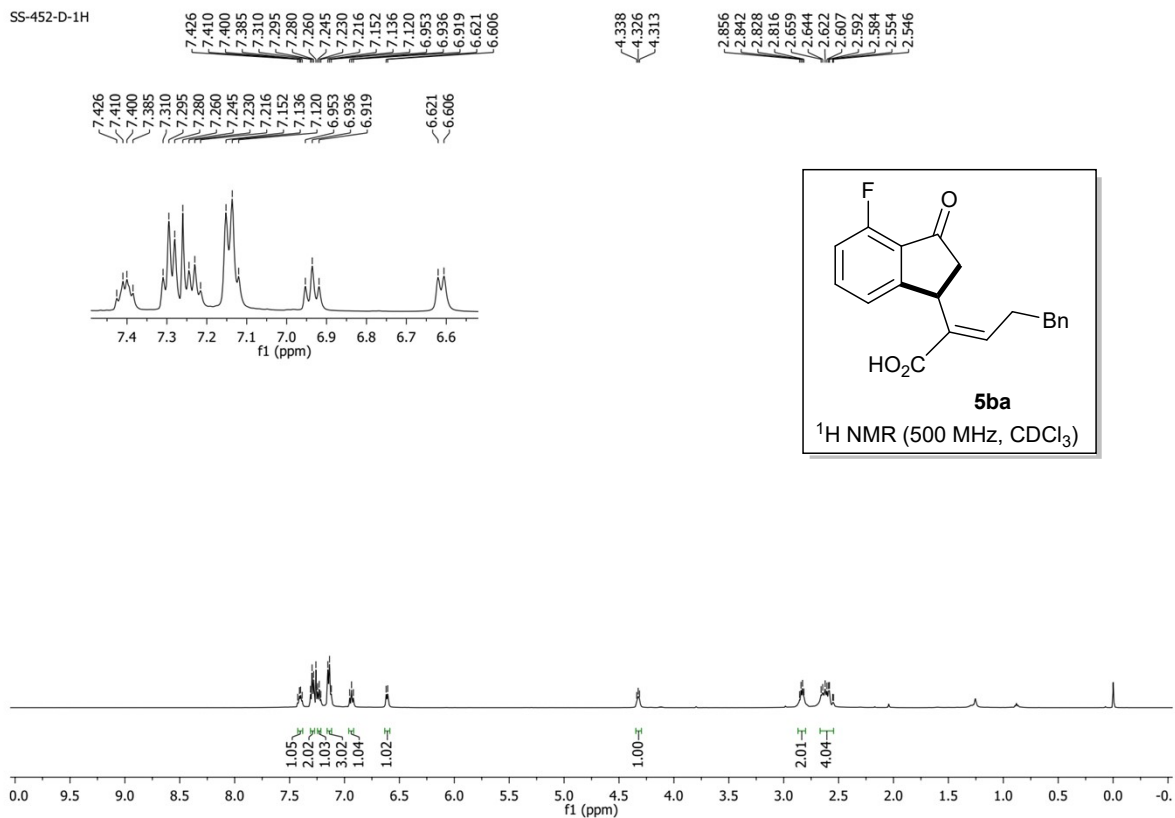

SS-452-13C.3.fid

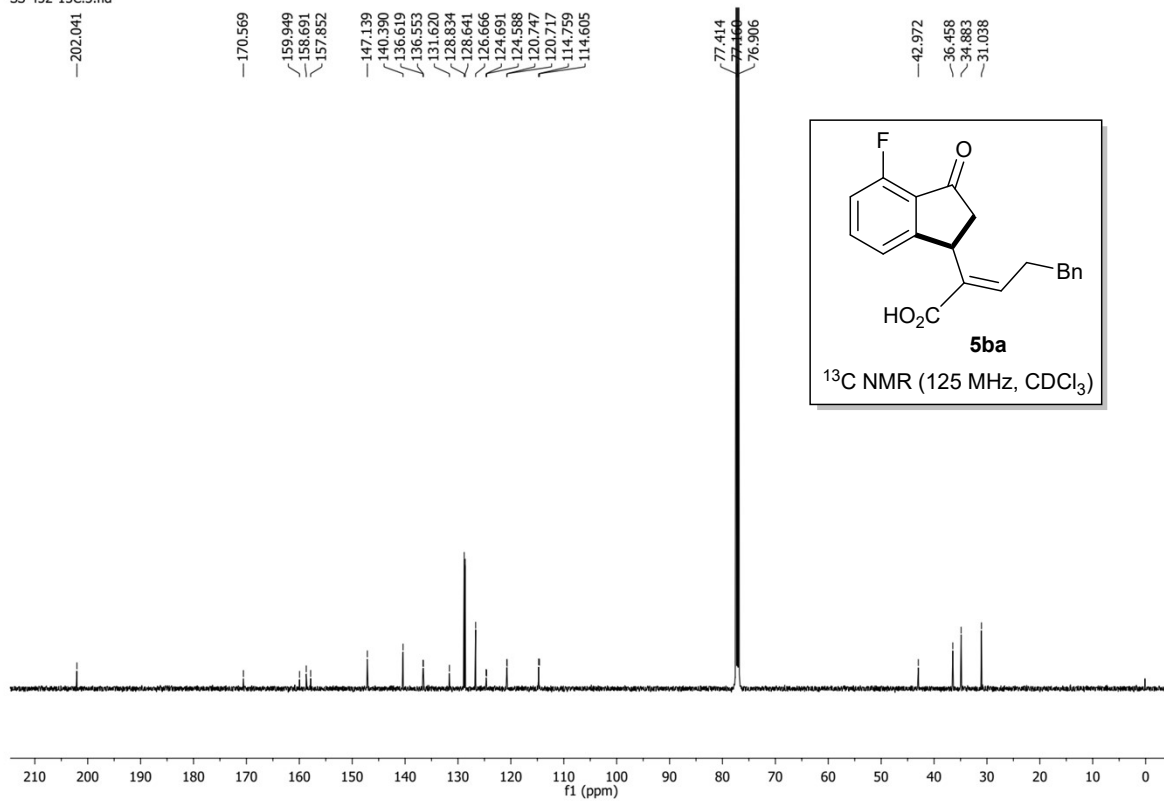

SS-452-19F

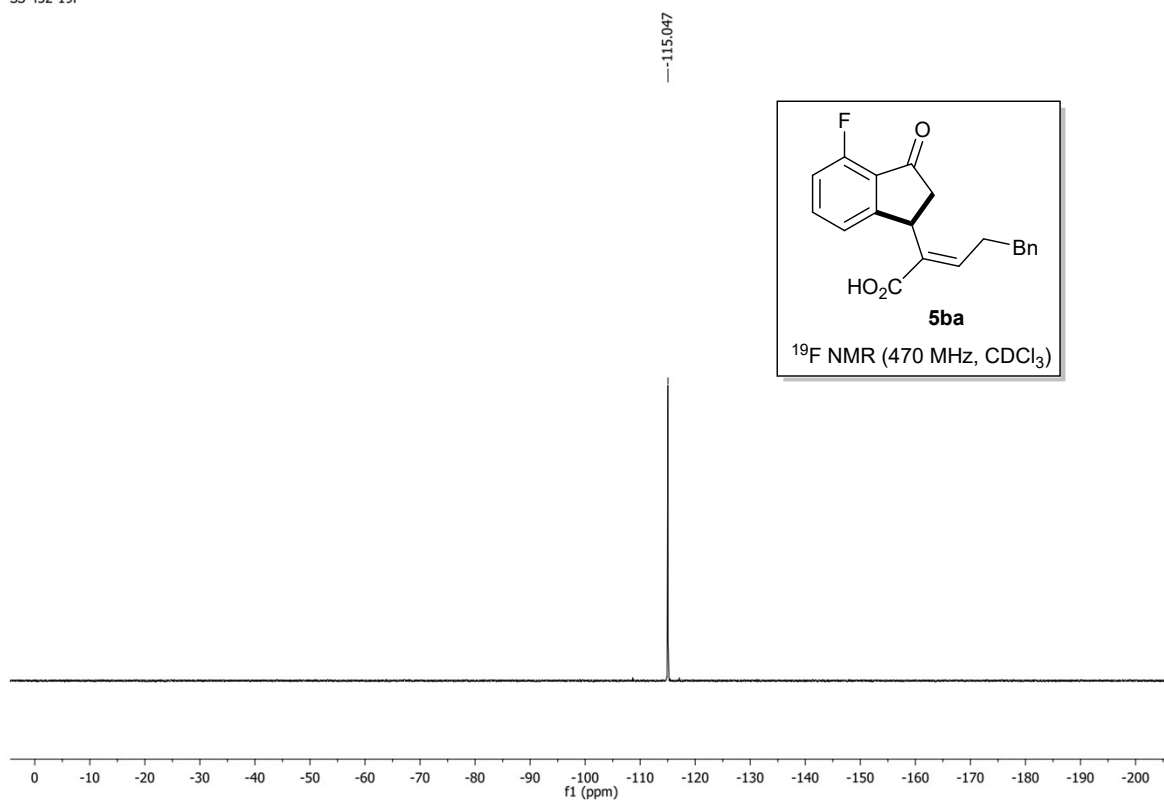







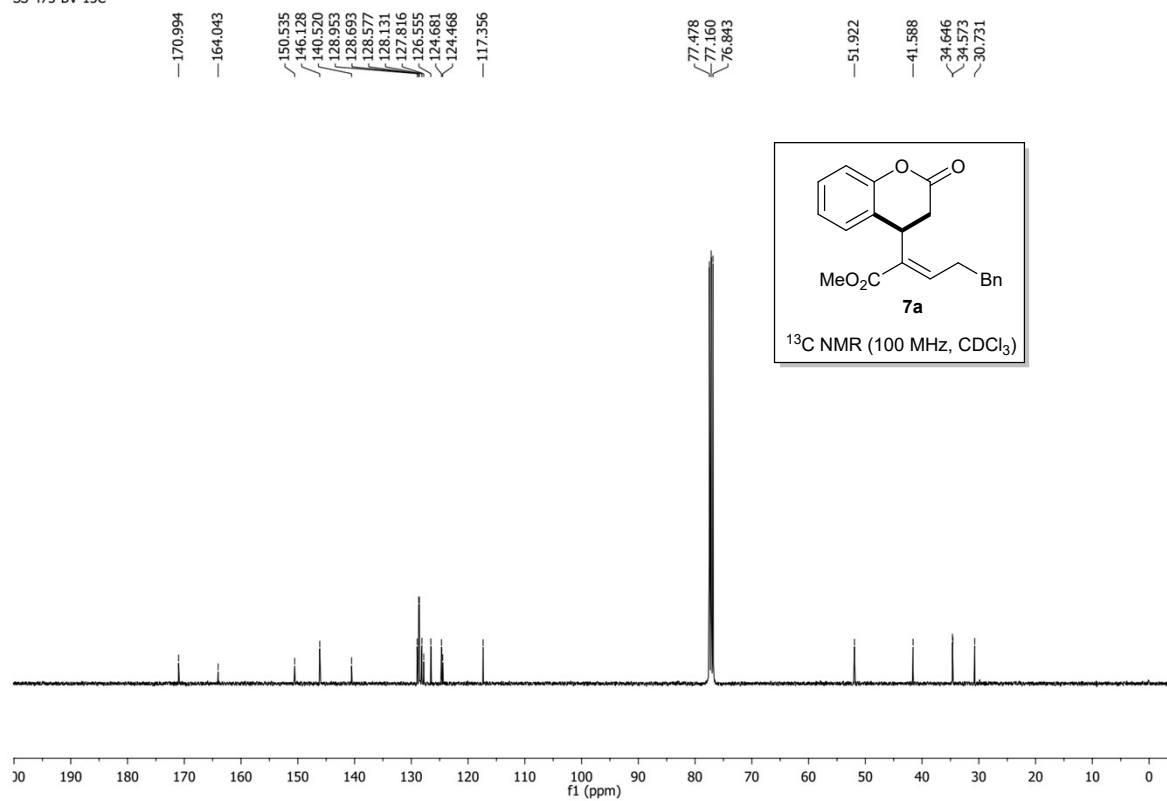

SS-417-ALD-1H

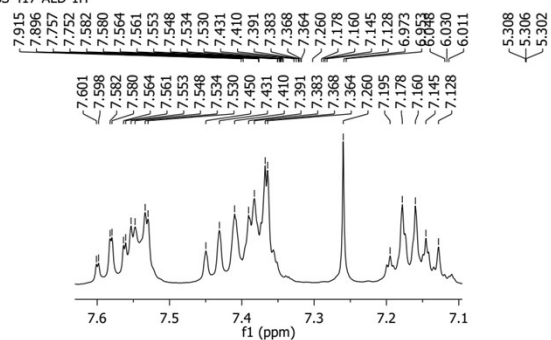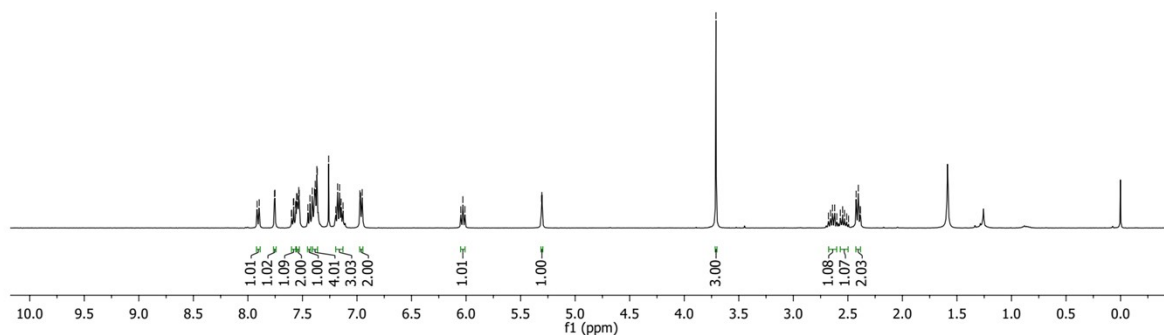

SS-417-ALD-13C

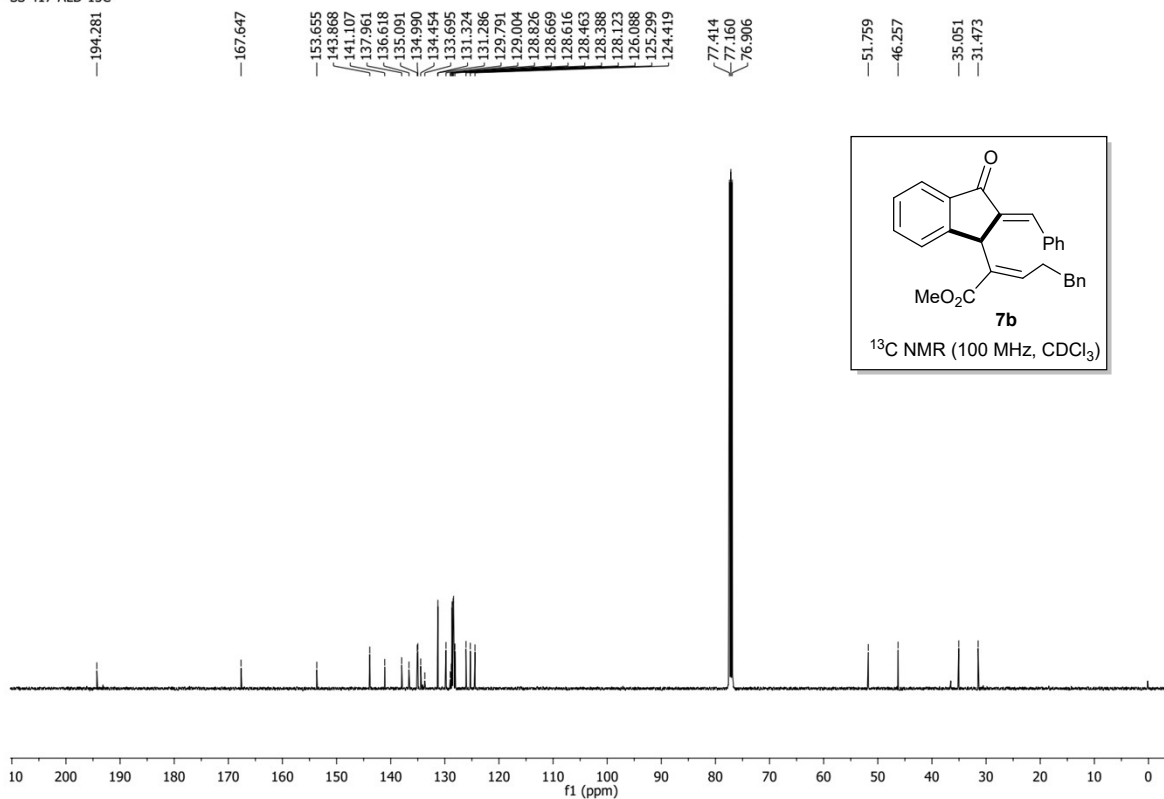

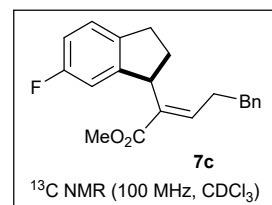

SS-421-ZN-13C

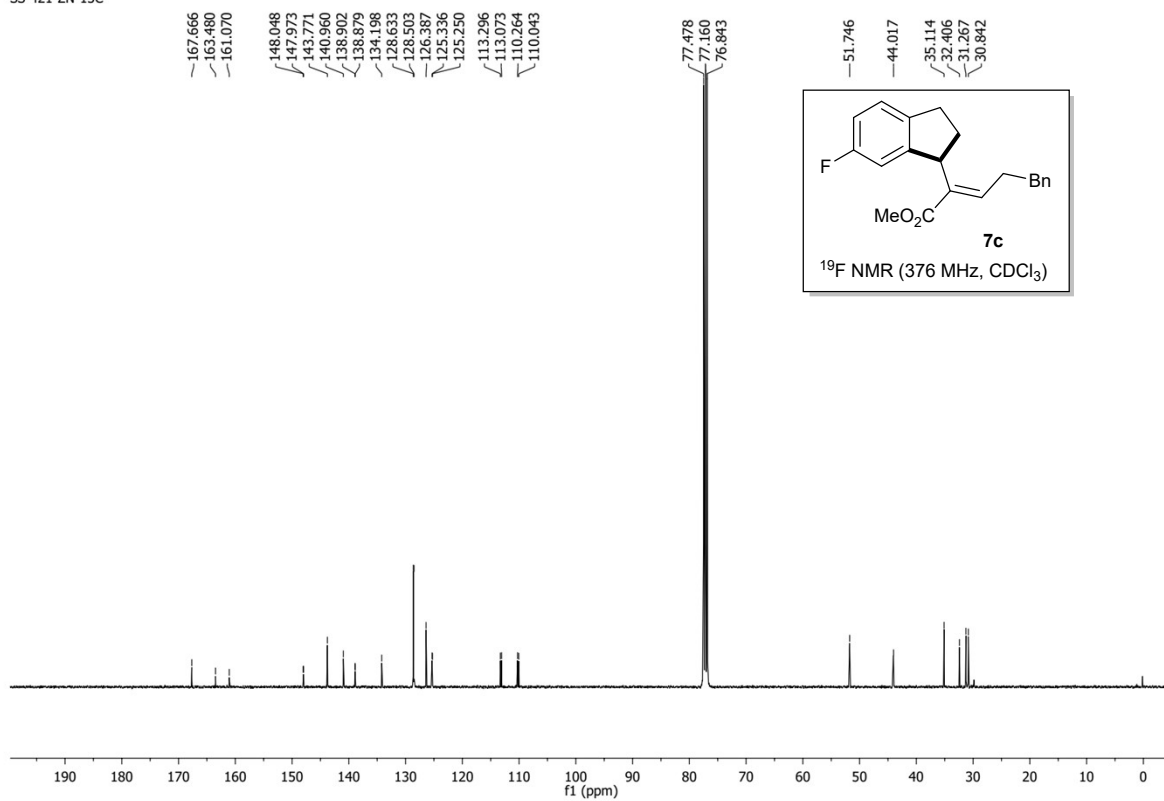

SS-421-ZN-19F

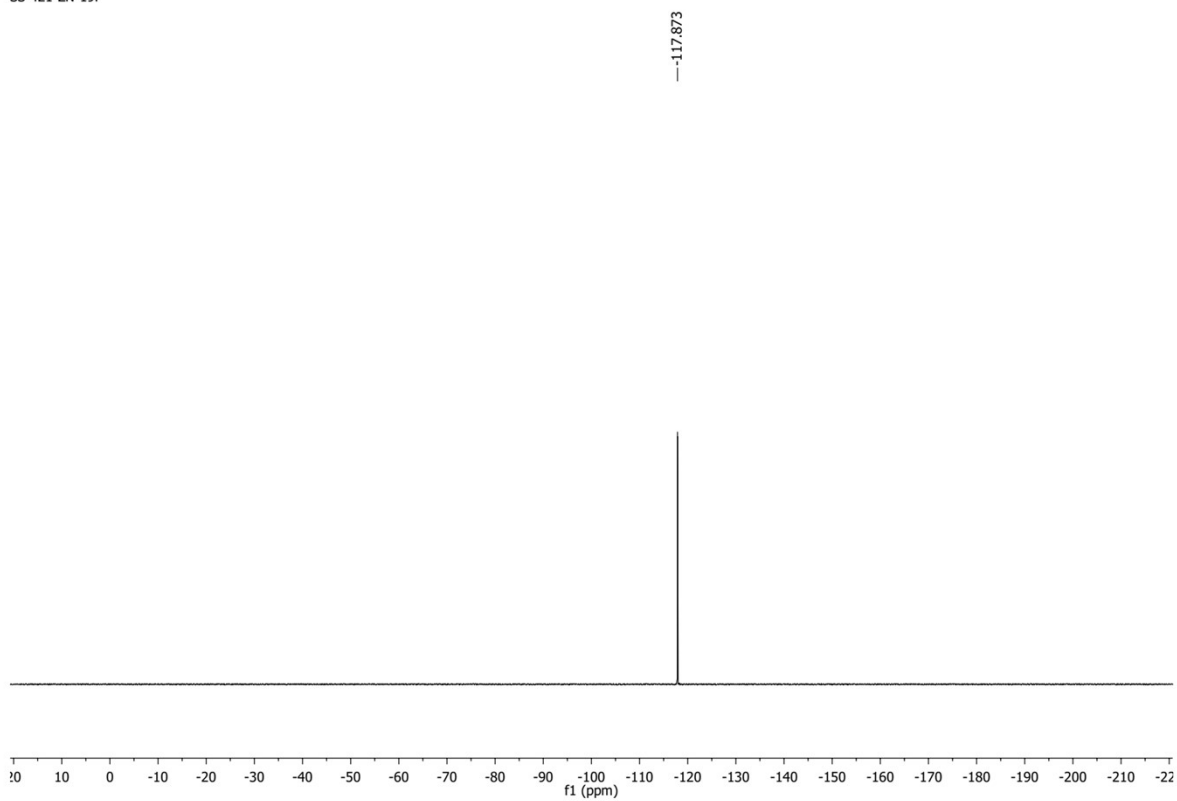

SS-417-SH-1H

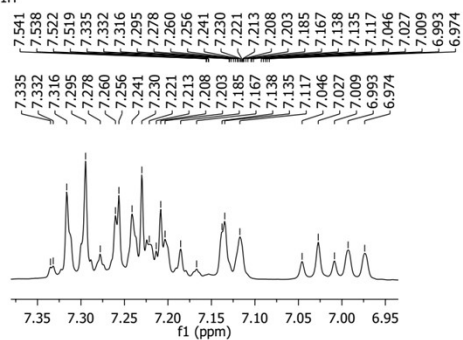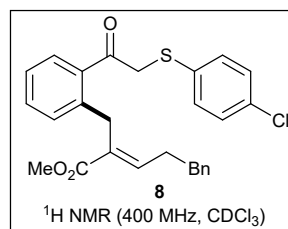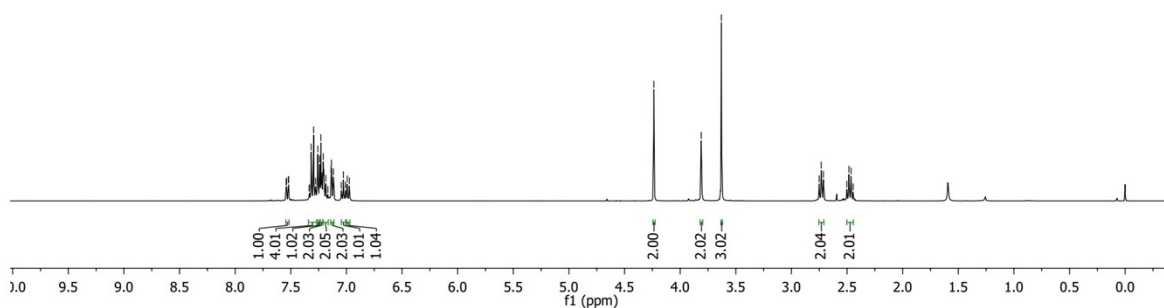

SS-417-SH-13C

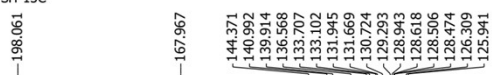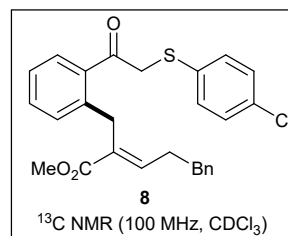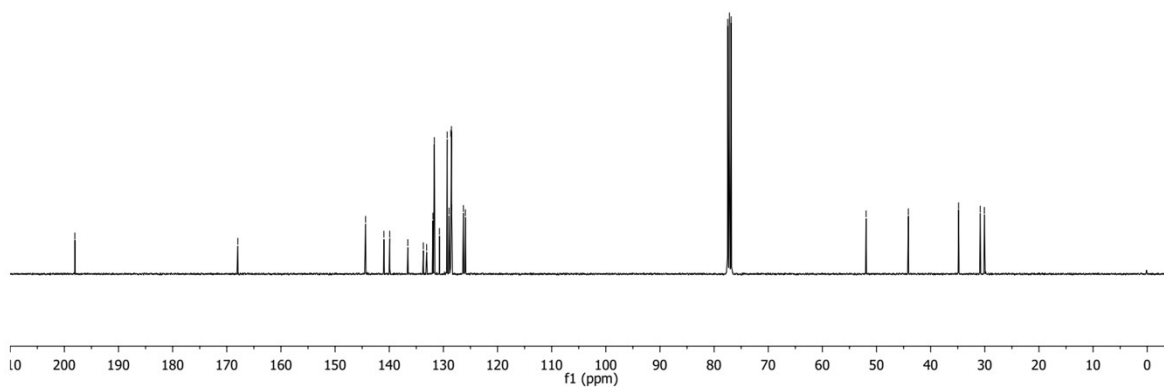

SS-455-ES-1H

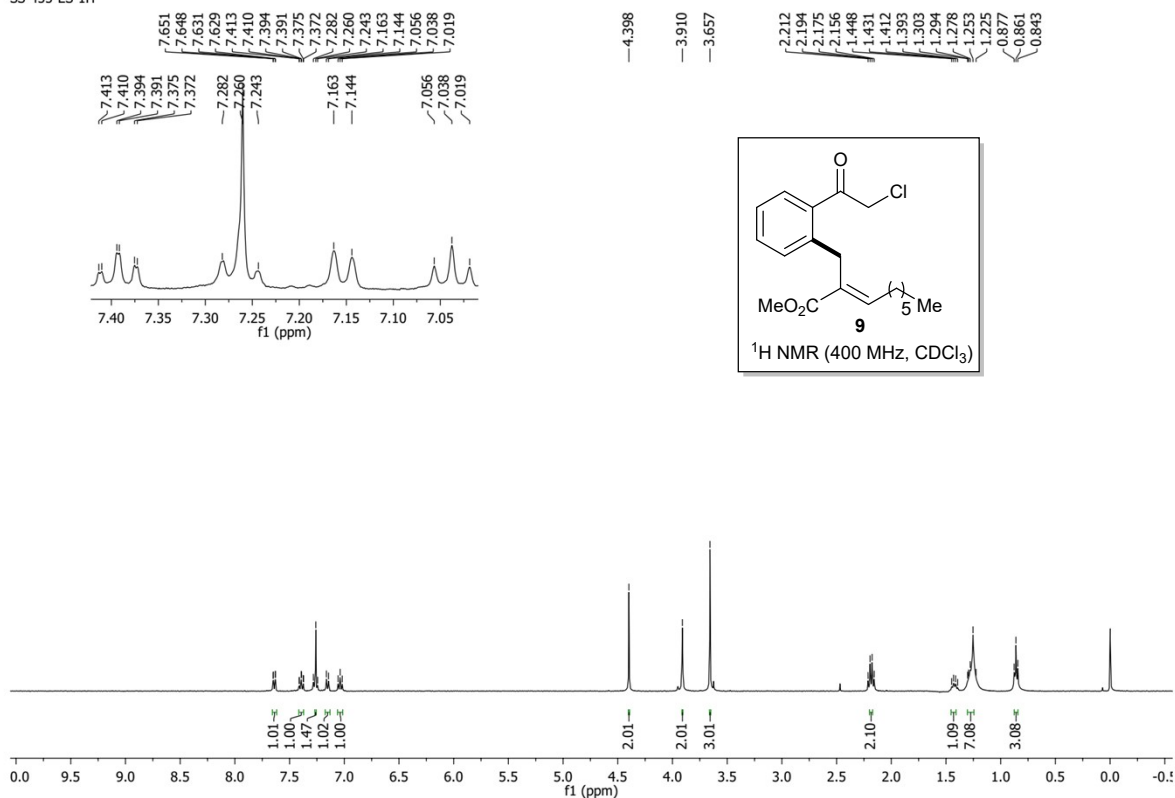

SS-455-ES-13C

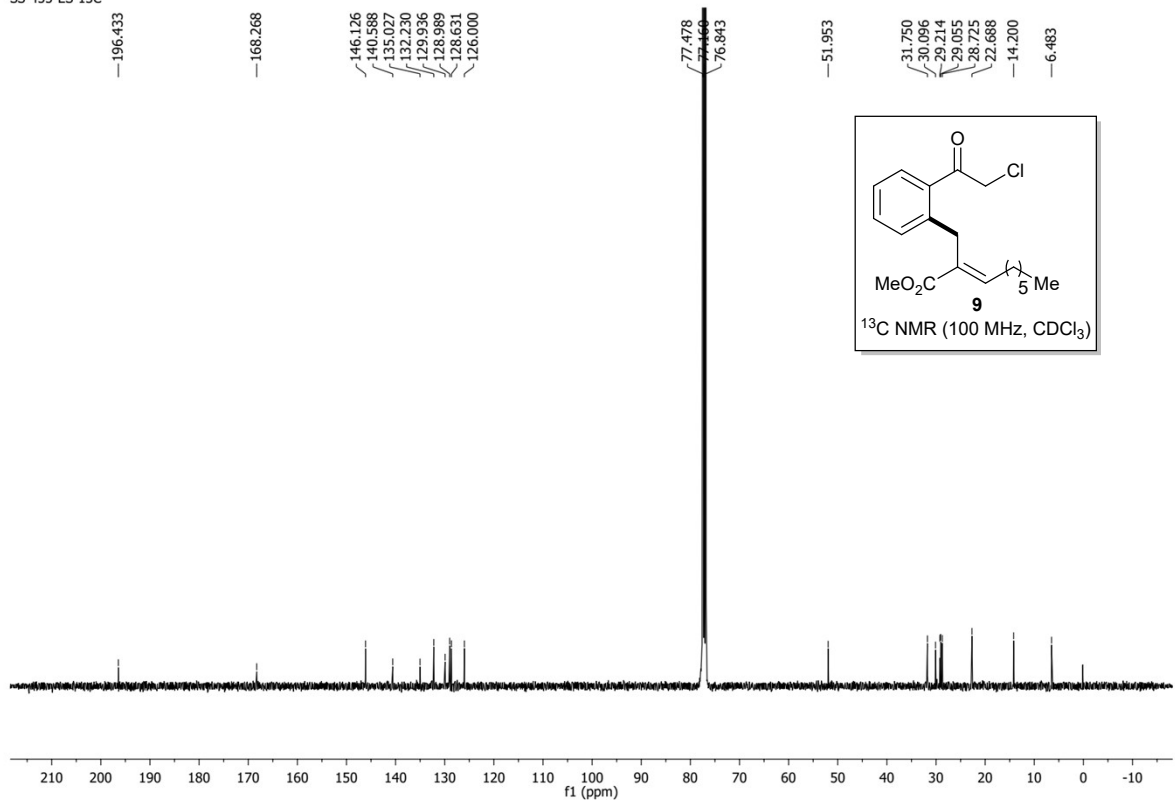

Supplement: d5cc05716g1.pdf [file d5cc05716g1.pdf]
